1                   **Multiple C2 domains and Transmembrane region Proteins (MCTPs)**  
2                   **tether membranes at plasmodesmata**

3  
4 Marie L. Brault<sup>1#</sup>, Jules D. Petit<sup>1,4#</sup>, Françoise Immel<sup>1</sup>, William J. Nicolas<sup>1†</sup>, Lysiane  
5 Brocard<sup>2</sup>, Amélia Gaston<sup>1†</sup>, Mathieu Fouché<sup>1†</sup>, Timothy J. Hawkins<sup>3</sup>, Jean-Marc Crowet<sup>4</sup>,  
6 Magali S. Grison<sup>1</sup>, Max Kraner<sup>5</sup>, Vikram Alva<sup>6</sup>, , Stéphane Claverol<sup>7</sup>, Magali Deleu<sup>4</sup>,  
7 Laurence Lins<sup>4</sup>, Jens Tilsner<sup>8,9\*</sup>, and Emmanuelle M. Bayer<sup>1\*</sup>

8  
9 1. Laboratory of Membrane Biogenesis, UMR5200 CNRS, University of Bordeaux, 71  
10 Avenue Edouard Bourloux, 33883 Villenave d'Ornon, France

11 2. Bordeaux Imaging Centre, Plant Imaging Plateform, UMS 3420, INRA-CNRS-INSERM-  
12 University of Bordeaux, 71 Av Edouard Bourloux, 33883 Villenave-d'Ornon, France

13 3. School of Biological and Biomedical Sciences, University of Durham, South Road,  
14 Durham DH1 3LE, U.K.

15 4. Laboratoire de Biophysique Moléculaire aux Interfaces, GX ABT, Université de Liège, B-  
16 5030 Gembloux, Belgium

17 5. Division of Biochemistry, Department of Biology, Friedrich-Alexander University  
18 Erlangen-Nuremberg, Staudtstr 5, D-91058 Erlangen, Germany

19 6. Department of Protein Evolution, Max Planck Institute for Developmental Biology  
20 Tübingen, Germany

21 7. Proteome Platform, Functional Genomic Center of Bordeaux, University of Bordeaux,  
22 33076 Bordeaux Cedex, France

23 8. Biomedical Sciences Research Complex, University of St Andrews, Fife KY16 9ST, U.K.

24 9. Cell and Molecular Sciences, The James Hutton Institute, Dundee DD2 5DA, U.K.

25  
26 †Present address: A.G and M.F.: UMR 1332 BFP, INRA, University of Bordeaux. W.N.:  
27 Division of Biology and Biological Engineering, California Institute of Technology,  
28 Pasadena, USA

29  
30 # These authors contributed equally to this work

31 \* Correspondence should be addressed to:

32 [emmanuelle.bayer@u-bordeaux.fr](mailto:emmanuelle.bayer@u-bordeaux.fr); Phone: +33 (0) 55712 2539

33 [jt58@st-andrews.ac.uk](mailto:jt58@st-andrews.ac.uk); Phone: +44 (0) 1334 464829

34 ORCID IDs: 0000-0001-8642-5293 (E.M.B); 0000-0003-3873-0650 (J.T.)

35 **ABSTRACT**

36 In eukaryotes, membrane contact sites (MCS) allow direct communication between  
37 organelles. Plants have evolved unique MCS, the plasmodesmata intercellular pores, which  
38 combine endoplasmic reticulum (ER) - plasma membrane (PM) contacts with regulation of  
39 cell-to-cell signalling. The molecular mechanism and function of membrane tethering within  
40 plasmodesmata remains unknown.

41 Here we show that the Multiple C2 domains and Transmembrane region Protein (MCTP)  
42 family, key regulators of cell-to-cell signalling in plants, act as ER - PM tethers specifically at  
43 plasmodesmata. We report that MCTPs are core plasmodesmata proteins that insert into the  
44 ER via their transmembrane region whilst their C2 domains dock to the PM through  
45 interaction with anionic phospholipids. A *mctp3/4* loss-of-function mutant induces plant  
46 developmental defects while MCTP4 expression in a yeast  $\Delta$ tether mutant partially restores  
47 ER-PM tethering. Our data suggest that MCTPs are unique membrane tethers controlling both  
48 ER-PM contacts and cell-cell signalling.

49

50

51

52

53

54

55

56

57

58

59

60

61

62

63

64

65

66

67

68

69

## 70 INTRODUCTION

71 Intercellular communication is essential for the establishment of multicellularity, and  
72 evolution gave rise to distinct mechanisms to facilitate this process. Plants have developed  
73 singular cell junctions -the plasmodesmata- which span the cell wall and interconnect nearly  
74 every single cell, establishing direct membrane and cytoplasmic continuity throughout the  
75 plant body (Tilsner *et al*, 2016). Plasmodesmata are indispensable for plant life. They control  
76 the flux of non-cell-autonomous signals such as transcription factors, small RNAs, hormones  
77 and metabolites during key growth and developmental events (Gallagher *et al*, 2014; Tilsner  
78 *et al*, 2016; Vatén *et al*, 2011; Carlsbecker *et al*, 2010; Benitez-Alfonso *et al*, 2013; Wu *et al*,  
79 2016; Han *et al*, 2014; Daum *et al*, 2014; Nakajima *et al*, 2001; Xu *et al*, 2011; Ross-elliott *et*  
80 *al*, 2017). Over the past few years, plasmodesmata have emerged as key components of plant  
81 defence signalling (Faulkner *et al*, 2013; Wang *et al*, 2013; Lim *et al*, 2016). Mis-regulation of  
82 plasmodesmata function can lead to severe defects in organ growth and tissue patterning but  
83 also generate inappropriate responses to biotic and abiotic stresses (Wu *et al*, 2016; Wong *et al*,  
84 2016; Han *et al*, 2014; Sager & Lee, 2014; Caillaud *et al*, 2014; Faulkner *et al*, 2013).  
85 Plasmodesmata not only serve as conduits, but act as specialised signalling hubs, capable of  
86 generating and/or relaying signals from cell-to-cell through plasmodesmata-associated  
87 receptor activity (Stahl & Faulkner, 2016; Stahl *et al*, 2013; Vaddepalli *et al*, 2014; Lee,  
88 2015).

89 Plasmodesmata are structurally unique (Nicolas *et al*, 2017b; Tilsner *et al*, 2011). They  
90 contain a strand of ER, continuous through the pores, tethered extremely tightly (~10 nm) to  
91 the PM by spoke-like elements (Ding *et al*, 1992; Nicolas *et al*, 2017a) whose function and  
92 identity is unknown. Inside plasmodesmata, specialised subdomains of the ER and the PM co-  
93 exist, each being characterised by a unique set of lipids and proteins, both critical for proper  
94 function (Bayer *et al*, 2014; Grison *et al*, 2015; Thomas *et al*, 2008a; Simpson *et al*, 2009;  
95 Zavaliev *et al*, 2016; Knox *et al*, 2015; Faulkner *et al*, 2013; Benitez-Alfonso *et al*, 2013).  
96 Where it enters the pores, the ER becomes constricted to a 15 nm tube (the desmotubule)  
97 leaving little room for lumenal trafficking. According to current models, transfer of molecules  
98 occurs in the cytoplasmic sleeve between the ER and the PM. Constriction of this gap, by the  
99 deposition of callose, is assumed to be the main regulator of the pore size exclusion limit  
100 (Vatén *et al*, 2011; Zavaliev *et al*, 2011). Recent work however, suggests a more complex  
101 picture where plasmodesmal ER-PM gap is not directly related to the pore permeability and  
102 may play additional roles (Nicolas *et al*, 2017a, 2017b). Newly formed plasmodesmata (type

103 I) exhibit such close contact (~2-3nm) between the PM and the ER, that no electron-lucent  
104 cytoplasmic sleeve is observed (Nicolas *et al*, 2017a). During subsequent cell growth and  
105 differentiation the pore widens, separating the two membranes, which remain connected by  
106 visible electron-dense spokes, leaving a cytosolic gap (type II). This transition has been  
107 proposed to be controlled by protein-tethers acting at the ER-PM interface (Bayer *et al*, 2017;  
108 Nicolas *et al*, 2017b). Counterintuitively, type I plasmodesmata with no apparent cytoplasmic  
109 sleeve are open to macromolecular trafficking and recent data indicate that tight ER-PM  
110 contacts may in fact favour transfer of molecules from cell-to-cell (Nicolas *et al*, 2017a).

111 The close proximity of the PM and ER within the pores, and the presence of tethers qualifies  
112 plasmodesmata as a specialised type of ER-to-PM membrane contact site (MCS) (Tilsner *et al*  
113 *al*, 2016; Bayer *et al*, 2017). MCS are structures found in all eukaryotic cells which function  
114 in direct inter-organelle signalling by promoting fast, non-vesicular transfer of molecules and  
115 allowing collaborative action between the two membranes (Burgoyne *et al*, 2015; Prinz, 2014;  
116 Phillips & Voeltz, 2016; Gallo *et al*, 2016; Eden *et al*, 2010, 2016; Ho *et al*, 2016; Chang *et al*  
117 *al*, 2013; Kim *et al*, 2015; Petkovic *et al*, 2014; Zhang *et al*, 2005; Omnus *et al*, 2016). In  
118 yeast and mammalian, MCS protein tethers are known to physically bridge the two  
119 organelles, to control the intermembrane gap and participate in organelle cross-talk. Their  
120 molecular identity/specificity dictate structural and functional singularity to different types of  
121 MCS (Eisenberg-Bord *et al*, 2016; Henne *et al*, 2015). To date, the plasmodesmal membrane  
122 tethers remain unidentified, but by analogy to other types of MCS it seems likely that they  
123 play important roles in plasmodesmal structure and function, and given their unique position  
124 within a cell-to-cell junction may link intra- and intercellular communication.

125 Here, we have reduced the complexity of the previously published *Arabidopsis* plasmodesmal  
126 proteome (Fernandez-Calvino *et al*, 2011) through the combination of a refined purification  
127 protocol (Faulkner & Bayer, 2017) and semi-quantitative proteomics, to identify ~120  
128 proteins highly enriched in plasmodesmata, and identify tether candidates. Amongst the most  
129 abundant plasmodesmal proteins, members of the Multiple C2 domains and Transmembrane  
130 region Proteins (MCTPs) were enriched in post-cytokinetic plasmodesmata with tight ER-PM  
131 gap compared to mature plasmodesmata with wider gap and sparse spokes, and exhibit the  
132 domain architecture characteristic of membrane tethers, with multiple lipid-binding C2  
133 domains in the N-terminal, and multiple transmembrane domains in the C-terminal region.  
134 Using live cell imaging, molecular dynamics, and yeast complementation, we show that  
135 MCTP properties are consistent with a role in ER-PM membrane tethering at plasmodesmata.  
136 As several MCTP members have been identified as important components of plant

137 intercellular signalling (Liu *et al*, 2012, 2018; Vaddepalli *et al*, 2014), our data suggest a link  
138 between inter-organelle contacts at plasmodesmata and inter-cellular communication in  
139 plants.  
140

## 141 RESULTS

142

### 143 Identification of plasmodesmal ER-PM tethering candidates

144 To identify putative plasmodesmal MCS tethers, we decided to screen the plasmodesmata  
145 proteome for ER-associated proteins (a general trait of ER-PM tethers (Henne *et al*, 2015;  
146 Eisenberg-Bord *et al*, 2016)) with structural features enabling bridging across two  
147 membranes. Published plasmodesmata proteome reported the identification of more than 1400  
148 proteins in *Arabidopsis* (Fernandez-Calvino *et al*, 2011), making the discrimination of true  
149 plasmodesmata-associated from contaminant proteins a major challenge. To reduce the  
150 proteome complexity and identify core plasmodesmata proteins, we used a refined  
151 plasmodesmata purification technique (Faulkner & Bayer, 2017) together with label-free  
152 comparative quantification (Supplementary Fig. 1a). Plasmodesmata and likely contaminant  
153 fractions, namely the PM, microsomal, total cell and cell wall fractions were purified from  
154 six-day old *Arabidopsis* suspension culture cells and simultaneously analysed by liquid-  
155 chromatography tandem mass-spectrometry (LC-MS/MS). For each protein identified, its  
156 relative enrichment in the plasmodesmata fraction versus “contaminant” fractions was  
157 determined (Supplementary Fig. 1b; Supplementary Table 1). Enrichment ratios for selecting  
158 plasmodesmal-candidates was set based on previously characterised plasmodesmal proteins  
159 (see M&M for details). This refined proteome dataset was reduced to 115 unique proteins,  
160 cross-referenced with two published ER-proteomes (Nikolovski *et al*, 2012; Dunkley *et al*,  
161 2006) and used as a basis for selecting MCS-relevant candidates.

162 Alongside, we also analysed changes in protein abundance during the ER-PM tethering  
163 transition from very tight contacts in post-cytokinetic plasmodesmata (type I) to larger ER-  
164 PM gap and sparse tethers in mature plasmodesmata (type II) (Nicolas *et al*, 2017a). For this  
165 we obtained a similar semi-quantitative proteome from four and seven-day old culture cells,  
166 enabling a comparison of plasmodesmata composition during the tethering transition (Nicolas  
167 *et al*, 2017a) (Supplementary Fig. 2).

168 A survey of our refined proteome identified several members of the Multiple C2 domains and  
169 Transmembrane region Proteins (MCTPs) family, namely AtMCTP3-7, 9, 10, 14-16, as both  
170 abundant and highly enriched at plasmodesmata (Supplementary Fig. 1b, Supplementary  
171 Table 1). In addition to being "core" plasmodesmata-associated proteins, our data also  
172 suggests that MCTPs are differentially regulated during the ER-PM tethering transition from  
173 post-cytokinetic to mature plasmodesmata (Nicolas *et al*, 2017a) (Supplementary Fig. 2).  
174 Amongst the 47 plasmodesmal proteins differentially enriched, all MCTPs were more

175 abundant (1.4 to 3.6 times) in type I (tight ER-PM contacts) compared with type II (open  
176 cytoplasmic sleeves) plasmodesmata (Supplementary Fig. 2).

177

178 **MCTPs are ER-associated proteins that stably cluster at plasmodesmata and present**  
179 **structural features of membrane tethers**

180 MCTPs are structurally reminiscent of the ER-PM tether families of mammalian extended-  
181 Synaptotagmins (HsE-Syts) and plant *Arabidopsis* Synaptotagmins (AtSYTs) (Pérez-Sancho  
182 *et al*, 2015b; Giordano *et al*, 2013), possessing lipid-binding C2 domains at one end and  
183 multiple transmembrane domains (TMDs) at the other, a domain organization consistent with  
184 the function of membrane tethers (Supplementary Fig. 3). Unlike HsE-Syts and AtSYTs, the  
185 transmembrane region of MCTPs is located at the C-terminus and three to four C2 domains at  
186 the N-terminus (Fig. 1a; Supplementary Fig. 3). Two members of the *Arabidopsis* MCTP  
187 family, AtMCTP1/Flower locus T Interacting Protein (FTIP) and AtMCTP15/QUIRKY  
188 (QKY) have previously been localised to plasmodesmata in *Arabidopsis* and implicated in  
189 cell-to-cell trafficking of developmental signals (Vaddepalli *et al*, 2014; Liu *et al*, 2012).  
190 However, two recent studies indicate that other MCTP members, including AtMCTP3, 4, 9,  
191 which show high plasmodesmata-enrichment in our proteome, do not associate with the pores  
192 *in vivo* (Liu *et al*, 2017, 2018).

193 We investigated the *in vivo* localisation of MCTPs identified in our proteomic screen by  
194 transiently expressing N-terminal fusions fluorescent proteins in *Nicotiana benthamiana*  
195 leaves. As the MCTP family is conserved in *N. benthamiana* (Supplementary Fig. 4) and to  
196 avoid working in a heterologous system we also examined the localisation of NbMCTP7,  
197 whose closest homolog in *Arabidopsis* was also identified as highly-enriched in  
198 plasmodesmata fractions (AtMCTP7; Supplementary Fig. 1). Confocal imaging showed that  
199 all selected MCTPs, namely AtMCTP3, 4, 6, 9 and NbMCTP7, displayed a similar  
200 subcellular localisation, with a faint ER-like network at the cell surface and a punctate  
201 distribution along the cell periphery at sites of epidermal cell-to-cell junctions (Fig. 1b, c).  
202 Time-lapse imaging showed that peripheral fluorescent punctae were immobile, which  
203 contrasted with the high mobility of the ER-like network (Supplementary Mov. 1). Co-  
204 localisation with RFP-HDEL confirmed MCTPs association with the cortical ER, while the  
205 immobile spots at the cell periphery perfectly co-localised with plasmodesmal markers  
206 (mCherry-PDCB1; (Simpson *et al*, 2009; Grison *et al*, 2015); Fig. 1c). Co-labelling with  
207 general ER-PM tethers such as VAP27.1-RFP and SYT1-RFP (Pérez-Sancho *et al*, 2015a;  
208 Wang *et al*, 2014), showed partial overlap with GFP-NbMCTP7, while co-localisation with

209 mCherry-PDCB1 was significantly higher (Supplementary Fig. 5). To further quantify and  
210 ascertain MCTP association with plasmodesmata, we measured a plasmodesmal enrichment  
211 ratio, hereafter named "plasmodesmata-index". For this we calculated fluorescence intensity  
212 at plasmodesmata pit-fields (indicated by mCherry-PDCB1 or aniline blue) *versus* cell  
213 periphery. All MCTPs tested displayed a high plasmodesmata-index, ranging from 1.85 to  
214 4.15, similar to PDLP1 (1.36) and PDCB1 (1.45) two-well established plasmodesmata  
215 markers (Thomas *et al*, 2008b; Simpson *et al*, 2009) (Fig. 1d), confirming enrichment of  
216 MCTPs at pit-fields. When stably expressed in *Arabidopsis thaliana* under the moderate  
217 promoter UBIQUITIN 10 or 35S promoters AtMCTP4, AtMCTP6 and AtMCTP9 were found  
218 mainly restricted to plasmodesmata (Supplementary Fig. 6a, white arrows), as indicated by an  
219 increase of their plasmodesmata-index compared with transient expression in *N. benthamiana*  
220 (Supplementary Fig. 6b). A weak but consistent ER localisation was also visible in stably  
221 transformed *Arabidopsis* (Supplementary Fig. 6a red stars).

222 To get a better understanding of MCTP distribution within the plasmodesmal pores, we  
223 further analysed transiently-expressed GFP-NbMCTP7 by 3D structured illumination super-  
224 resolution microscopy (3D-SIM) (Fitzgibbon *et al*, 2010) (Fig. 1e). We found that NbMCTP7  
225 is associated with all parts of plasmodesmata including the neck regions and central cavity, as  
226 well as showing continuous fluorescence throughout the pores. In some cases, lateral  
227 branching of plasmodesmata within the central cavity was resolved. The very faint continuous  
228 fluorescent threads connecting neck regions and central cavity correspond to the narrowest  
229 regions of the pores and may indicate association with the central desmotubule (Fig. 1e, white  
230 arrows).

231 Using Fluorescence Recovery After Photobleaching (FRAP) we then assessed the mobility of  
232 NbMCTP7. We found that, when associated with the cortical ER the fluorescence recovery  
233 rate of GFP-NbMCTP7 was extremely fast and similar to RFP-HDEL with half-times of 1.16  
234 sec and 0.99 sec, respectively (Fig. 2). By contrast, when GFP-NbMCTP7 was associated  
235 with plasmodesmata, the recovery rate slowed down to a half-time of 4.09 sec, indicating  
236 restricted mobility, though still slightly faster than for the cell wall-localised plasmodesmal  
237 marker mCherry-PDCB1 (5.98 sec). Overall, these results show that NbMCTP7 mobility is  
238 high at the cortical ER but becomes restricted inside the pores.

239 From our data we concluded that MCTPs are ER-associated proteins, whose members  
240 specifically and stably cluster at plasmodesmata. They display the structural features required  
241 for ER-PM tethering and are differentially associated with the pores during the transition in  
242 ER-PM contacts.



243 **AtMCTP4 is a core plasmodesmata-associated protein and loss-of-function *mctp3/mctp4***  
244 **double mutants show pleiotropic developmental defects**

245 We next focused on AtMCTP4, which according to our proteomic screen qualifies as a core  
246 plasmodesmal constituent considering that it is one of the most abundant proteins in our  
247 refined proteome (Supplementary Table 1). The implication of AtMCTP4 association with  
248 plasmodesmata is that the protein contributes functionally to cell-to-cell signalling. Given the  
249 importance of plasmodesmata in tissue patterning and organ growth, a loss-of-function mutant  
250 is expected to show defects in plant development. We first obtained T-DNA insertion lines for  
251 AtMCTP4 and its closest homolog AtMCTP3, which share 92.8% identity and 98.7%  
252 similarity in amino acids with AtMCTP4, but both single knockouts showed no apparent  
253 phenotypic defects (data not shown). We therefore generated an *Atmctp3/Atmctp4* double  
254 mutant, which presented pleiotropic developmental defects with a severely dwarfed and bushy  
255 phenotype, twisted leaves with increased serration (Fig. 3 a-d), and multiple inflorescences  
256 (not shown). Whilst preparing this manuscript another paper describing the *Atmctp3/Atmctp4*  
257 mutant was published (Liu *et al*, 2018), reporting similar developmental defects. We noted  
258 additional phenotypic defects in particular aberrant pattern in the root apical meristem  
259 organisation specifically within the quiescent center (QC) (Fig. 3e). Instead of presenting the  
260 typical four-cell layer organisation, we observed aberrant cell division pattern in  
261 *Atmctp3/Atmctp4* mutant with asymmetrical division in the QC, suggesting that both proteins  
262 may play a general role in cell stem niche maintenance (Liu *et al*, 2018).

263 AtMCTP4 has recently been reported as an endosomal-localised protein (Liu *et al*, 2018),  
264 which is in conflict with our data indicating plasmodesmata association. To further check  
265 AtMCTP4 localisation, we expressed the protein as a GFP N-terminal fusion protein under its  
266 own promoter and analysed its localisation in *Arabidopsis* stable lines. Similar to transient  
267 expression experiments (Fig. 1), we found that pMCTP4:GFP-AtMCTP4 was located at  
268 stable punctate spots at the cell periphery (Fig. 3f white arrows; Suppl movie 2), in all tissues  
269 examined, *i.e.* leaf epidermal and spongy mesophyll cells, hypocotyl epidermis, lateral root  
270 primordia, root tip, and inflorescence shoot apical meristem. These immobile dots co-  
271 localised perfectly with aniline blue indicating plasmodesmata association (Fig.3f top row),  
272 which was also evident in leaf spongy mesophyll cells where the dotted pattern of  
273 pMCTP4:GFP-AtMCTP4 was present on adjoining walls (containing plasmodesmata), but  
274 absent from non-adjoining walls (without plasmodesmata) (Fig.3f white arrowheads). We also  
275 observed a weak but consistent ER-association of AtMCTP4 (Fig.3f, red stars).

276 In summary we concluded that whatever the tissue and organ considered, AtMCTP4 is  
277 strongly and consistently associated with plasmodesmata but also presents a steady  
278 association with the ER and that *Atmctp3/Atmctp4* loss-of-function is detrimental for normal  
279 plant development, including previously uncovered defect in the root apical meristem.

280

### 281 **The C-terminal transmembrane regions of MCTPs serve as ER-anchors**

282 A requirement for tethers is that they physically bridge two membranes. Often this is achieved  
283 through lipid-binding module(s) at one terminus of the protein, and transmembrane domain(s)  
284 at the other (Eisenberg-Bord *et al*, 2016; Henne *et al*, 2015). All sixteen *Arabidopsis* MCTPs  
285 contain two to three predicted TMDs near their C-terminus (collectively referred to as the  
286 transmembrane region, TMR). To test whether the MCTP TMRs are determinants of ER-  
287 insertion, we generated truncation mutants lacking the C2 domains for NbMCTP7,  
288 AtMCTP3, AtMCTP4, AtMCTP6, AtMCTP9 as well as AtMCTP1/FTIP and  
289 AtMCTP15/QKY (Fig. 4a). When fused to YFP at their N-terminus, all truncated mutants  
290 retained ER-association, as demonstrated by co-localisation with RFP-HDEL (Fig. 4b left  
291 panels). Meanwhile plasmodesmata association was completely lost and the plasmodesmata-  
292 index of all truncated MCTP\_TMRs dropped below one, comparable to RFP-HDEL (Fig. 4b  
293 right panels and c), quantitatively confirming the loss of plasmodesmata association when the  
294 C2 modules were deleted. We therefore concluded that, similar to the HsE-Syt and AtSYT  
295 ER-PM tether families (Giordano *et al*, 2013; Levy *et al*, 2015; Pérez-Sancho *et al*, 2015b),  
296 MCTPs insert into the ER through their TMRs, but the TMR is not sufficient for MCTP  
297 plasmodesmal localisation.

298

### 299 **MCTP C2 domains can bind membranes in an anionic lipid-dependent manner**

300 Members of the HsE-Syt and AtSYT tether families bridge across the intermembrane gap and  
301 dock to the PM via their C2 domains (Pérez-Sancho *et al*, 2015b; Pérez-sancho *et al*, 2016;  
302 Giordano *et al*, 2013; Saheki *et al*, 2016). *Arabidopsis* MCTPs contain three to four C2  
303 domains, which may also drive PM-association through interactions with membrane lipids.  
304 C2 domains are independently folded structural and functional modules with diverse modes of  
305 action, including membrane docking, protein-protein interactions and calcium sensing  
306 (Corbalan-Garcia & Gómez-Fernández, 2014).

307 To investigate the function of MCTP C2 modules, we first searched for homologs of  
308 AtMCTP individual C2 domains (A, B, C, and D) amongst all human and *A. thaliana* proteins  
309 using the HHpred webserver (Zimmermann *et al*, 2018) for remote homology detection. The

310 searches yielded a total of 1790 sequence matches, which contained almost all human and *A.*  
311 *thaliana* C2 domains. We next clustered the obtained sequences based on their all-against-all  
312 pairwise similarities in CLANS (Frickey & Lupas, 2018). In the resulting map  
313 (Supplementary Fig. 7a), the C2 domains of *Arabidopsis* MCTPs (AtMCTPs, coloured cyan)  
314 most closely match the C2 domains of membrane-trafficking and -tethering proteins,  
315 including human MCTPs (HsMCTPs, green), human Synaptotagmins (HsSyts, orange),  
316 human Ferlins (HsFerlins, blue), human HsE-Syts (HsE-Syts, magenta) and *Arabidopsis*  
317 SYTs (AtSYTs, red), most of which dock to membranes through direct interaction with  
318 anionic lipids (Giordano *et al*, 2013; Saheki *et al*, 2016; Pérez-Lara *et al*, 2016; Abdullah *et*  
319 *al*, 2014; Marty *et al*, 2014). By comparison to the C2 domains of these membrane-trafficking  
320 and -tethering proteins, the C2 domains of most other proteins do not make any connections  
321 to the C2 domains of AtMCTPs at the *P-value* cut-off chosen for clustering ( $1e-10$ ). Thus,  
322 based on sequence similarity, the plant AtMCTP C2 domains are expected to bind  
323 membranes.

324 We next asked whether the C2 modules of MCTPs are sufficient for PM association *in vivo*.  
325 Fluorescent protein fusions of the C2A-D or C2B-D modules without the TMR were  
326 generated for NbMCTP7, AtMCTP3, AtMCTP4, AtMCTP6, AtMCTP9 as well as  
327 AtMCTP1/FTIP and AtMCTP15/QKY and expressed in *N. benthamiana*. We observed a  
328 wide range of sub-cellular localisations from cytosolic to PM-associated and in all cases  
329 plasmodesmata association was lost (Supplementary Fig. 7b-d).

330 To further investigate the potential for MCTP C2 domains to interact with membranes, we  
331 employed molecular dynamics modelling. We focussed on AtMCTP4, as a major  
332 plasmodesmal constituent and whose loss-of-function in conjunction with AtMCTP3, induces  
333 severe plant development defects (Liu *et al*, 2018) (Fig. 3). We first generated the 3D  
334 structures of all three C2 domains of AtMCTP4 using 3D homology modelling, and then  
335 tested the capacity of individual C2 to dock to membrane bilayers using coarse-grained  
336 dynamic simulations (Fig. 5a; Suppl movie 3). Molecular dynamics modelling was performed  
337 on three different membranes; 1) a neutral membrane composed of phosphatidylcholine (PC),  
338 2) a membrane with higher negative charge composed of PC and phosphatidylserine (PS; 3:1)  
339 and 3) a PM-mimicking lipid bilayer, containing PC, PS, sitosterol and the anionic  
340 phosphoinositide phosphatidyl inositol-4-phosphate (PI4P; 57:19:20:4). The simulations  
341 showed that all individual C2 domains of AtMCTP4 can interact with lipids and dock on the  
342 membrane surface when a "PM-like" lipid composition was used (Fig. 5a). The PC-only  
343 membrane showed only weak interactions, whilst the PC:PS membrane allowed only partial

344 docking (Fig. 5a). Docking of AtMCTP4 C2 domains arose mainly through electrostatic  
345 interactions between lipid polar heads and basic amino acid residues at the protein surface.  
346 We further tested two other MCTP members, namely AtMCTP15/QKY and NbMCTP7,  
347 which possess four rather than three C2 domains. We found that similar to AtMCTP4, the  
348 individual C2 domains of AtMCTP15/QKY and NbMCTP7 exhibited membrane interaction  
349 in the presence of the negatively charged lipids (Supplementary Fig. 8).

350 Our molecular dynamics data thus suggests that membrane docking of the AtMCTP4 C2  
351 domains depends on the electrostatic charge of the membrane and more specifically on the  
352 presence of PI4P, a negatively-charged lipid which has been reported as controlling the  
353 electrostatic field of the PM in plants (Simon *et al*, 2016).

354 To confirm the importance of PI4P for MCTP membrane interactions and thus, potentially  
355 subcellular localisation, we used a short-term treatment with phenylarsine oxide (PAO), an  
356 inhibitor of PI4-kinases (Simon *et al*, 2016). We focused on *Arabidopsis* root tips where  
357 effects of PAO have been thoroughly characterised (Simon *et al*, 2016). In control-treated  
358 roots of *Arabidopsis* plants stably expressing UB10:YFP-AtMCTP4, the fluorescent signal  
359 was most prominent at the apical-basal division plane of epidermal root cells, where  
360 numerous plasmodesmata are established during cytokinesis (Grison *et al*, 2015) (Fig. 5b  
361 white arrowheads). The YFP-AtMCTP4 fluorescence pattern was punctate at the cell  
362 periphery, each spot of fluorescence corresponding to a single or group of plasmodesmata  
363 (Fig. 5c, white arrows). We found that 40 min treatment with PAO (60  $\mu$ M) induced a loss in  
364 the typical spotty plasmodesmata-associated pattern and instead AtMCTP4 became more  
365 homogeneously distributed along the cell periphery (Fig.5b-c). To confirm the effect of PAO  
366 on the cellular PI4P pool, we used a PI4P-biosensor (1XPH FAPP1) which showed a clear  
367 shift from PM-association to cytosolic localisation upon treatment with PAO (Simon *et al*,  
368 2016) (Fig. 5b). This control not only demonstrates that the PAO treatment was successful,  
369 but also highlights that the majority of PI4P was normally found at the PM, rather than the  
370 ER, of *Arabidopsis* root cells. Therefore, the effect of PAO on YFP-AtMCTP4 localisation is  
371 likely related to a perturbation of PM docking by the MCTP4 C2 domains.

372 Altogether, our data suggest that the C2 domains of plant MCTPs can dock to membranes in  
373 the presence of negatively charged phospholipids, and that PI4P depletion reduced AtMCTP4  
374 stable association with plasmodesmata.

375

376

377

378 **AtMCTP4 expression is sufficient to partially restore ER-PM contacts in yeast**

379 To further test the ability of MCTPs to physically bridge across membranes and tether the ER  
380 to the PM, we used a yeast  $\Delta$ tether mutant line deleted in six ER-PM tethering proteins  
381 resulting in the separation of the cortical ER (cER) from the PM (Manford *et al*, 2012) and  
382 expressed untagged AtMCTP4. To monitor recovery in cortical ER, and hence, ER-PM  
383 contacts, upon AtMCTP4 expression, we used Sec63-RFP (Metzger *et al*, 2008) as an ER  
384 marker combined with confocal microscopy. In wild-type cells, the ER was organised into  
385 nuclear (nER) and cER. The cER was visible as a thread of fluorescence along the cell  
386 periphery, covering a large proportion of the cell circumference (Fig. 6a white arrows). By  
387 contrast and as previously reported (Manford *et al*, 2012), we observed a substantial reduction  
388 of cER in the  $\Delta$ tether mutant, with large areas of the cell periphery showing virtually no  
389 associated Sec63-RFP (Fig. 6a). When AtMCTP4 was expressed into the  $\Delta$ tether mutant line,  
390 we observed partial recovery of cER, visible as small regions of Sec63-RFP closely apposed  
391 to the cell cortex. We further quantified the extent of cER in the different lines by measuring  
392 the ratio of the length of cER (Sec63-RFP) against the cell perimeter (through calcofluor wall  
393 staining) and confirmed that AtMCTP4 expression induced an increase of cER from 7.3 % to  
394 23.1% when compared to the  $\Delta$ tether mutant (Fig. 6b). This partial complementation is  
395 similar to results obtained with yeast deletion mutants containing only a single endogenous  
396 ER-PM tether, IST2, or all three isoforms of the tricalbin (yeast homologs of HsE-Syts)  
397 (Manford *et al*, 2012), supporting a role of AtMCTP4 as ER-PM tether.

398

399 **DISCUSSION**

400 In plants, communication between cells is facilitated and regulated by plasmodesmata, ~50  
401 nm diameter pores that span the cell wall and provide cell-to-cell continuity of three different  
402 organelles: the PM, cytoplasm, and ER. The intercellular continuity of the ER and the  
403 resulting architecture of the pores make them unique amongst eukaryotic cellular junctions,  
404 and qualify plasmodesmata as a specialised type of ER-PM MCS (Bayer *et al*, 2017; Tilsner  
405 *et al*, 2016). Like other types of MCS, the membranes within plasmodesmata are physically  
406 connected but so far the molecular components and function of the ER-PM tethering  
407 machinery remain an enigma.

408 Here, we provide evidence that members of the MCTP family, some of which have been  
409 described as key regulators of intercellular trafficking and cell-to-cell signalling (Vaddepalli  
410 *et al*, 2014; Liu *et al*, 2018, 2012), also act as ER-PM tethers inside the plasmodesmata pores.

411

## 412 **MCTPs as core plasmodesmal components**

413 Whilst several MCTPs have previously been characterised as regulators of cell-to-cell  
414 trafficking or signalling (Liu *et al*, 2012, 2018; Vaddepalli *et al*, 2014; Liu *et al*, 2017), only  
415 some have also been localised to plasmodesmata, whilst other studies reported alternative  
416 localisations which include PM, ER, Golgi, endosomes and cytoplasm (Trehin *et al*, 2013;  
417 Liu *et al*, 2017, 2018, 2012; Kraner *et al*, 2017; Vaddepalli *et al*, 2014), perhaps depending on  
418 the isoform, orientation of fluorescent protein fusions and expression context. Here, we have  
419 identified several MCTPs (6-10 out of 16) as belonging to the most abundant proteins at  
420 plasmodesmata through both *in vivo* and proteomic data. This includes AtMCTP3 and  
421 AtMCTP4 recently identified as modulators of SHOOTMERISTEMLESS trafficking (Liu *et*  
422 *al*, 2018), for which we find that a *Atmctp3/Atmctp4* loss-of-function mutant displays a severe  
423 developmental phenotype, including defects in the root QC, that agrees with the findings of  
424 Liu *et al*, 2018. Whereas Liu *et al*. (2018) observed endosomal-localisation of AtMCTP3 and  
425 AtMCTP4, our data suggest they are primarily plasmodesmata-associated. We therefore  
426 propose that MCTPs are core plasmodesmata-constituents and that AtMCTP3 and AtMCTP4  
427 may possibly regulate the transport of SHOOTMERISTEMLESS, at the pores.

428

## 429 **MCTPs as plasmodesmata-specific ER-PM tethers**

430 While ER-PM contacts within plasmodesmata have been observed for decades (Ding *et al*,  
431 1992; Tilsner *et al*, 2011; Tilney *et al*, 1991; Nicolas *et al*, 2017b), the molecular identity of  
432 the tethers has remained elusive. Here we propose that MCTPs are prime plasmodesmal  
433 membrane tethering candidates as they possess all required features: 1) strong association  
434 with plasmodesmata; 2) structural similarity to known ER-PM tethers such as HsE-Syts and  
435 AtSYTs (Levy *et al*, 2015; Pérez-Sancho *et al*, 2015b; Giordano *et al*, 2013) possessing an  
436 ER-inserted TMR at one end and multiple lipid-binding C2 domains at the other for PM  
437 docking; 3) the ability to partially restore ER-PM tethering in a yeast  $\Delta$ tether mutant.

438 Similarly to other ER-PM tethers (Eisenberg-Bord *et al*, 2016; Wong *et al*, 2016; Henne *et al*,  
439 2015; Giordano *et al*, 2013), MCTP C2 domains dock to the PM through electrostatic  
440 interaction with anionic lipids, especially PI4P and to a lesser extent PS. In contrast with  
441 animal cells, PI4P is found predominantly at the PM in plant cells and defines its electrostatic  
442 signature (Simon *et al*, 2016). Although plasmodesmata are MCS, they are also structurally  
443 unique: both the ER and the PM display extreme, and opposing membrane curvature inside  
444 the pores; the ER tubule is linked to the PM on all sides; and the membrane apposition is  
445 unusually close (2-3 nm in type I post-cytokinetic pores (Nicolas *et al*, 2017a)). So while

446 structurally related to known tethers, MCTPs are also expected to present singular properties.  
447 For instance, similar to the human MCTP2, MCTPs could favour ER membrane curvature  
448 through their TMR (Joshi *et al*, 2017). Plasmodesmata also constitute a very confined  
449 environment, which together with the strong negative curvature of the PM, may require the  
450 properties of MCTP C2 domains to differ from that of HsE-Syts or AtSYTs. All of these  
451 aspects will need to be investigated in the future.

452

### 453 **Inter-organellar signalling at the plasmodesmal MCS?**

454 In yeast and animals, MCS have been shown to be privileged sites for inter-organelle  
455 signalling by promoting fast, non-vesicular transfer of molecules such as lipids (Gallo *et al*,  
456 2016; Saheki *et al*, 2016; Wong *et al*, 2016). Unlike the structurally analogous tethering  
457 proteins AtSYTs and HsE-Syts, MCTPs do not harbour known lipid-binding domains that  
458 would suggest that they participate directly in lipid transfer between membranes. However,  
459 MCTPs are likely to act in complex with other proteins (Fulton *et al*, 2009; Trehin *et al*,  
460 2013) which may include lipid shuttling proteins. For instance, AtSYT1, which contains a  
461 lipid-shuttling SMP (synaptotagmin-like mitochondrial-lipid binding protein) domain  
462 (Reinisch & De Camilli, 2016), is recruited to plasmodesmata during virus infection and  
463 promotes virus cell-to-cell movement (Levy *et al*, 2015). MCS tethers typically interact with  
464 other MCS components and locally regulate their activity, act as Ca<sup>2+</sup> sensors, or modulate  
465 membrane spacing to turn lipid shuttling on or off (Eden *et al*, 2010, 2016; Ho *et al*, 2016;  
466 Chang *et al*, 2013; Kim *et al*, 2015; Giordano *et al*, 2013; Idevall-Hagren *et al*, 2015a;  
467 Petkovic *et al*, 2014; Zhang *et al*, 2005; Fernández-Busnadiego *et al*, 2015; Omnus *et al*,  
468 2016; Saheki *et al*, 2016). Similar activities could be performed by MCTPs at plasmodesmata.  
469 To date however, ER-PM cross-talk at plasmodesmata remains hypothetical.

470

### 471 **Combining organelle tethering and cell-to-cell signalling functions**

472 Several members of the MCTP family have previously been implicated in regulating either  
473 macromolecular trafficking or intercellular signalling through plasmodesmata.  
474 AtMCTP1/FTIP interacts with, and is required for phloem entry of the Flowering Locus T  
475 (FT) protein, triggering transition to flowering at the shoot apical meristem (Liu *et al*, 2012).  
476 Similarly, AtMCTP3/AtMCTP4 regulate trafficking of SHOOTMERISTEMLESS in the  
477 shoot apical meristem, however in this case they prevent cell-to-cell trafficking (Liu *et al*,  
478 2018). AtMCTP15/QKY promotes the transmission of an unidentified non-cell-autonomous  
479 signal through interaction with the plasmodesmata/PM-located receptor-like kinase

480 STRUBBELIG (Vaddepalli *et al*, 2014). Thus, previously characterised MCTP proteins  
481 regulate intercellular trafficking/signalling either positively or negatively.  
482 Whilst the mechanisms by which these MCTP proteins regulate intercellular  
483 transport/signalling have not been elucidated, MCTP physical interaction with mobile factors  
484 or receptor is critical for proper function (Vaddepalli *et al*, 2014; Liu *et al*, 2017, 2018, 2012).  
485 In AtMCTP1/FTIP, the interaction is mediated by the C2 domain closest to the TMR (Liu *et*  
486 *al*, 2017). For the C2 domains of HsE-Syts, conditional membrane docking is critical for their  
487 function and depends on intramolecular interactions, cytosolic  $Ca^{2+}$  and the presence of  
488 anionic lipids (Idevall-Hagren *et al*, 2015b; Fernández-Busnadiego *et al*, 2015; Saheki *et al*,  
489 2016; Bian *et al*, 2018; Giordano *et al*, 2013). With three to four C2 domains, it is  
490 conceivable that MCTPs assume different conformations within the cytoplasmic sleeve in  
491 response to changes in the plasmodesmal PM composition,  $Ca^{2+}$ , and the presence of  
492 interacting mobile signals (Fig.7), which could link membrane tethering to cell-cell signalling.  
493 Understanding in detail how MCTPs function in the formation and regulation of the  
494 plasmodesmal MCS will be an area of intense research in the coming years.  
495  
496  
497



498 MAIN FIGURE

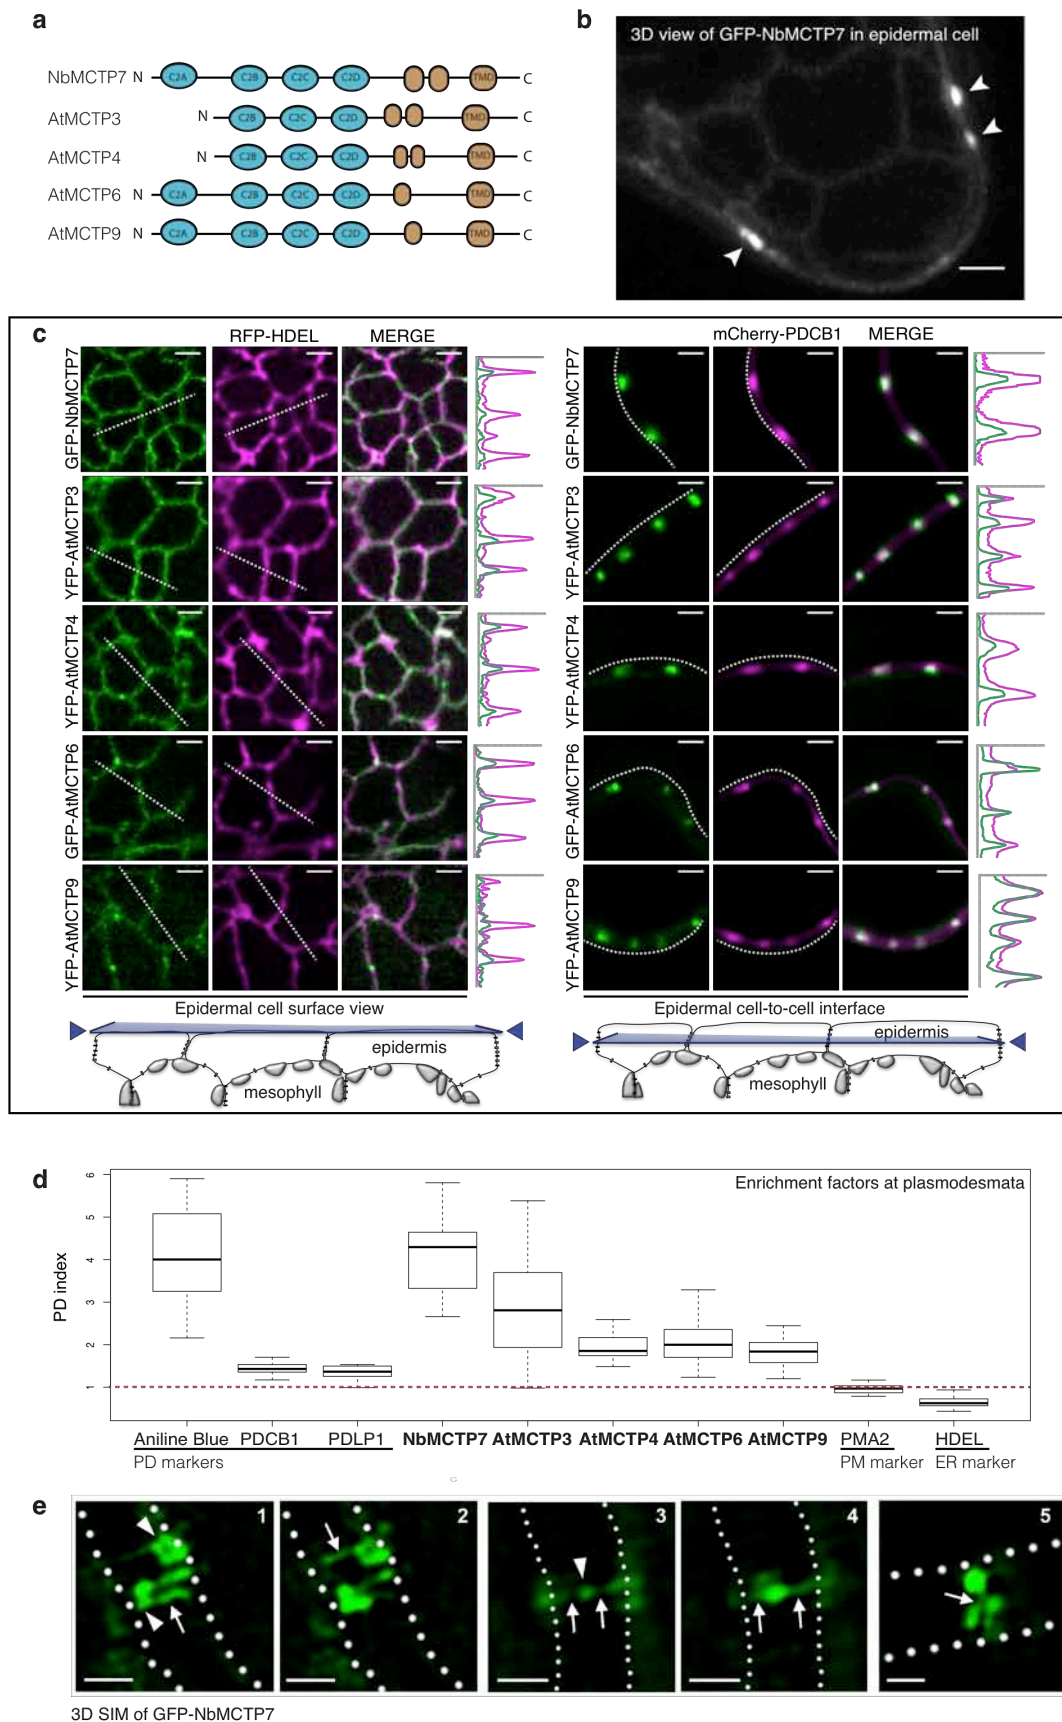

499 **Figure 1 | MCTPs are ER-associated proteins that cluster at plasmodesmata.**  
500 Localisation of AtMCTP3, 4, 6, 9 and NbMCTP7 in *N. benthamiana* epidermal cells  
501 visualised by confocal microscopy. MCTPs were tagged at their N-terminus with YFP or GFP  
502 and expressed transiently under 35S (NbMCTP7) or UBIQUITIN10 promoters (AtMCTP3, 4,  
503 6 and 9). **a**, Schematic representation of MCTP domain organisation, with three to four C2  
504 domains in N-terminal and multiple transmembrane domains (TMD) at the C-terminus. **b**,  
505 GFP-NbMCTP7 associates with punctae at the cell periphery (white arrowheads) and labels a  
506 reticulated network at the cell surface resembling the cortical ER. Maximum projection of z-  
507 stack. Scale bar, 2  $\mu\text{m}$  **c**, Single optical sections at cell surface (left) or cell-to-cell interface  
508 (right), showing the co-localisation between MCTPs and the ER-marker RFP-HDEL (left)  
509 and the plasmodesmata marker mCherry-PDCB1 (right). Intensity plots along the white  
510 dashed lines are shown for each co-localisation pattern. Scale bars, 2  $\mu\text{m}$ . **d**, The  
511 plasmodesmata (PD) index of individual MCTPs is above 1 (red dashed line), and similar to  
512 known plasmodesmata markers (aniline blue, PDCB1, PDLP1) confirming enrichment at  
513 plasmodesmata. By comparison the PM-localised proton pump ATPase PMA2 and the ER  
514 marker HDEL that are not enriched at plasmodesmata and have a PD-index below 1. **e**, 3D-  
515 SIM images (individual z-sections) of GFP-NbMCTP7 within three different pit fields (panels  
516 1-2, 3-4 and 5, respectively) showing fluorescence signal continuity throughout the pores,  
517 enrichment at plasmodesmal neck regions (1-2, arrowheads in 1), central cavity (3-4,  
518 arrowhead in 3) and branching at central cavity (5, arrow). Dashed lines indicate position of  
519 cell wall borders. Scale bars, 500 nm.

520  
521  
522  
523  
524  
525  
526  
527  
528

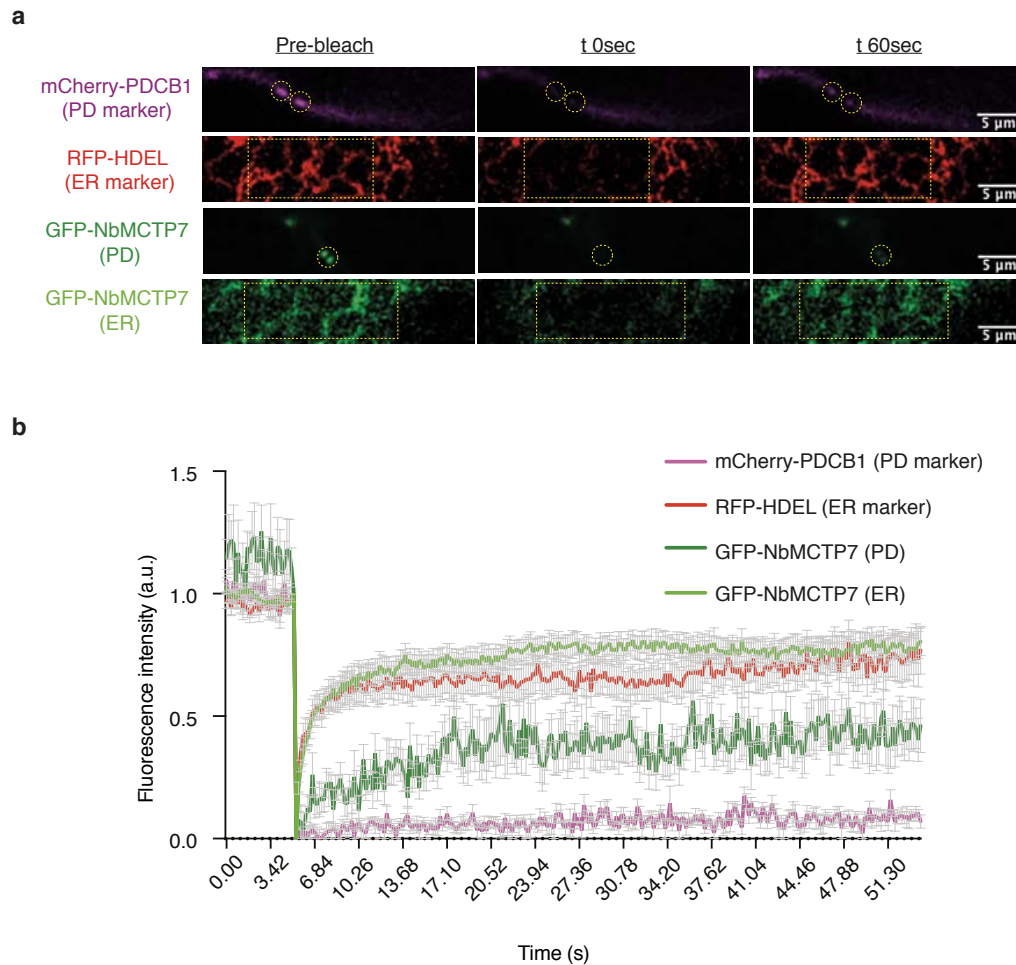

529

530 **Figure 2 | NbMCTP7 mobility at plasmodesmata is reduced compared to cortical ER.**

531 FRAP analysis of NbMCTP7 in *N. benthamiana* leaf epidermal cells. **a**, Representative  
532 prebleach and postbleach images for mCherry-PDCB1 (purple; plasmodesmata marker), RFP-  
533 HDEL (red; ER marker) and GFP-NbMCTP7 at plasmodesmata (dark green) and at the  
534 cortical ER (light green). Yellow dashed boxes or circles indicate the bleach region. **b**, FRAP  
535 comparing the mobility of GFP-NbMCTP7 at plasmodesmata (dark green) and at the cortical  
536 ER (light green) to that of RFP-HDEL (red) and mCherry-PDCB1 (purple). NbMCTP7 is  
537 highly mobile when associated with the ER as indicated by fast fluorescent recovery but  
538 shows reduced mobility when associated with plasmodesmata. Data are averages of at least 3  
539 separate experiments, and error bars indicate standard error.

540

541

542

543

544

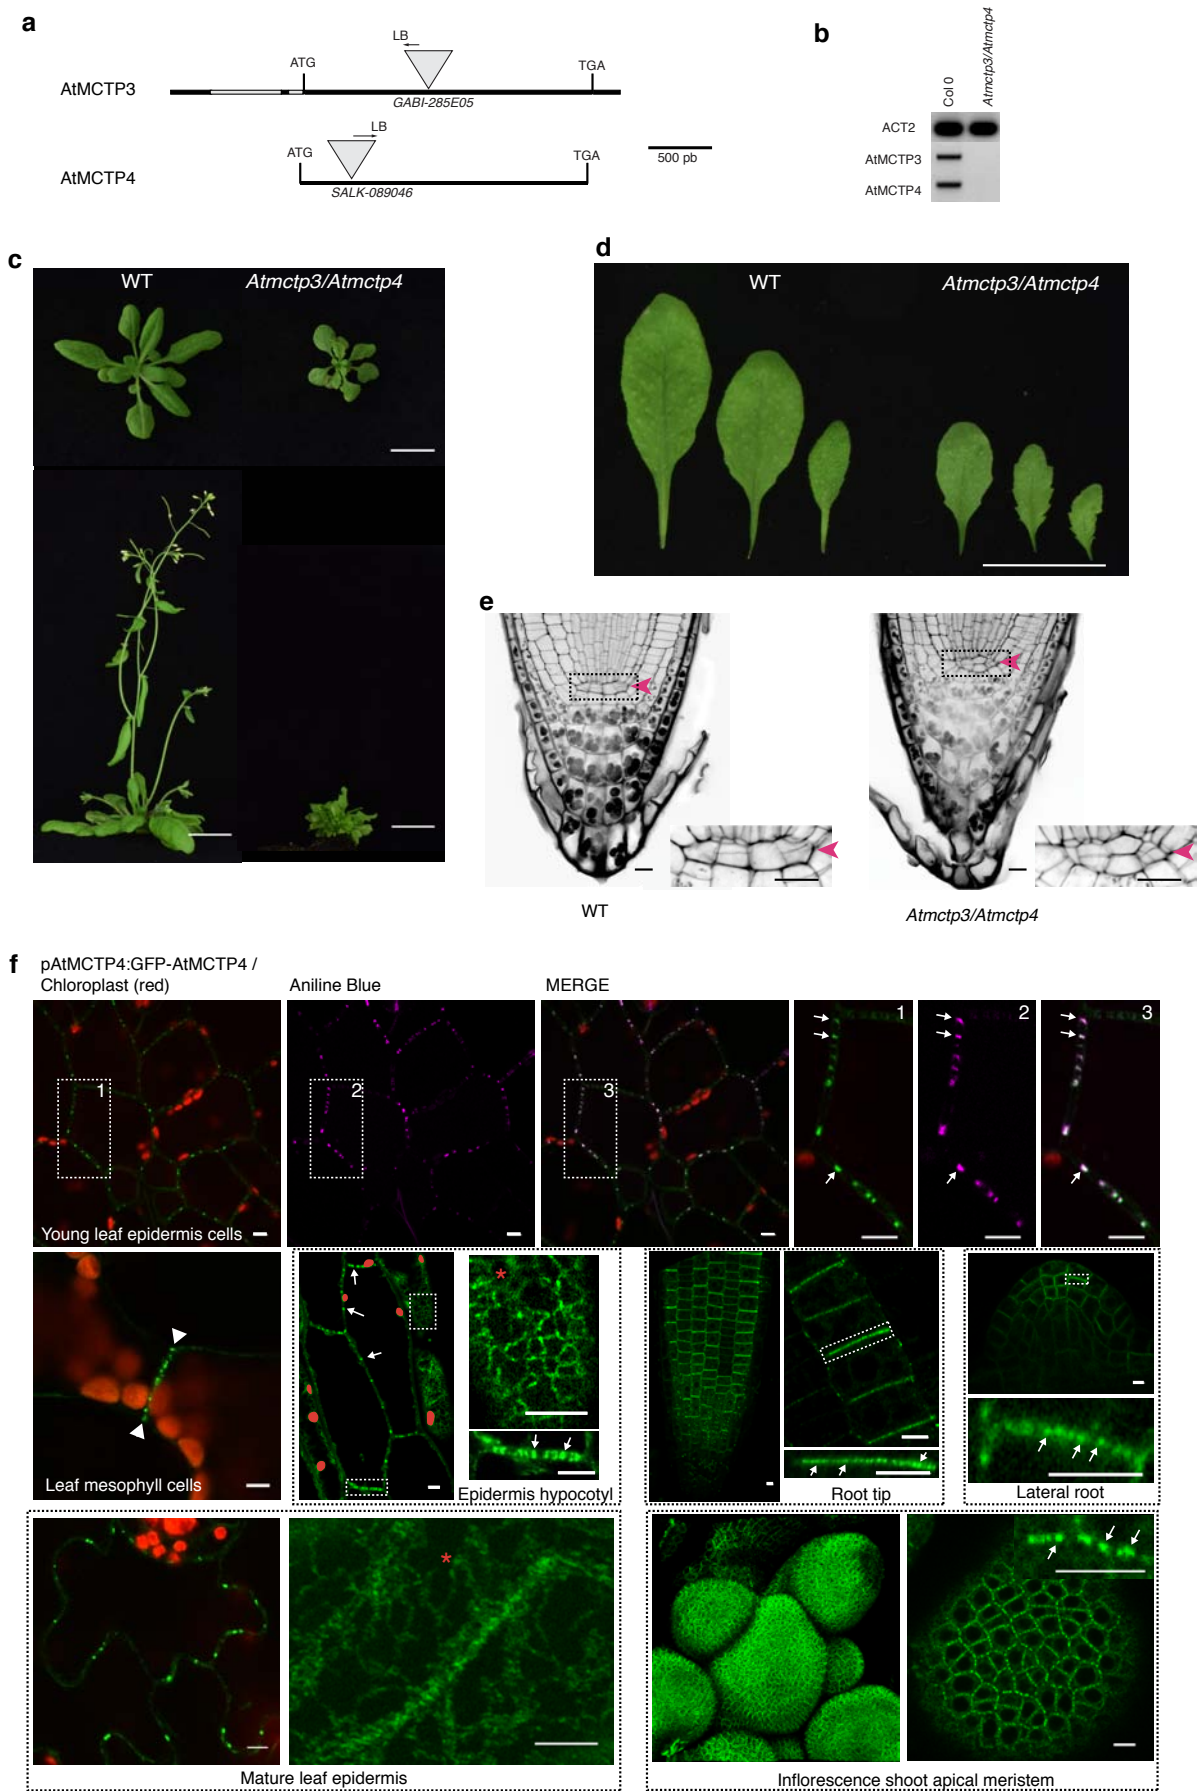

546 **Figure 3 | AtMCTP4 is a core plasmodesmal protein and *Atmctp3/Atmctp4* loss-of-**  
547 **function double mutant shows severe defects in development.**

548 **a-e**, Characterisation of *Atmctp3/Atmctp4* double mutant in *Arabidopsis*. **a**, Schematic  
549 representation of T-DNA insertions in *AtMCTP3* and *AtMCTP4*. LB, left border. **b**, RT-PCR  
550 analysis of *AtMCTP3*, *AtMCTP4* and *Actin2* (*ACT2*) transcripts in Col-0 wild type (WT) and  
551 *Atmctp3/Atmctp4* double mutant showing the absence of full-length transcripts in the  
552 *Atmctp3/Atmctp4* double mutant. **c**, Rosette and inflorescence stage phenotypes of  
553 *Atmctp3/Atmctp4* double mutant compared to Col-0 WT. Scale bar, 2 cm **d**, Leaf phenotypes  
554 of *Atmctp3/Atmctp4* double mutant compared to WT. Scale bar, 2 cm. **e**, Pseudo-Schiff-  
555 Propidium iodide method-stained root tips of WT and *Atmctp3/Atmctp4* double mutant.  
556 Defect in quiescent center (QC, red arrowheads) cell organisation was observed in 20 out of  
557 20 plants examined. Scale bars, 10  $\mu$ m. **f**, Subcellular localisation of GFP-*AtMCTP4* under  
558 *MCTP4* native promoter in *Arabidopsis* transgenic lines visualised by confocal microscopy.  
559 In all tissues examined GFP-*MCTP4* shows a typical punctate distribution of plasmodesmata  
560 at the cell boundaries (indicated by white arrows). In leaf spongy mesophyll GFP-*MCTP4*  
561 punctate pattern was visible only on adjoining walls (arrowheads), which contain  
562 plasmodesmata but absent from non-adjoining walls. GFP-*MCTP4* dots at the cell periphery  
563 are immobile (see Suppl movie2) and co-localise perfectly with aniline blue (top row)  
564 confirming plasmodesmata localisation. In most tissues examined an ER-reticulated pattern  
565 was also observable (red stars). Boxed regions are magnified in adjacent panels. Please note  
566 that optical scan of epidermis hypocotyl were imaged in the airy scan mode and chloroplasts  
567 were manually outlined in red. Scale bars, 5  $\mu$ m.

568

569

570

571

572

573

574

575

576

577

578

579

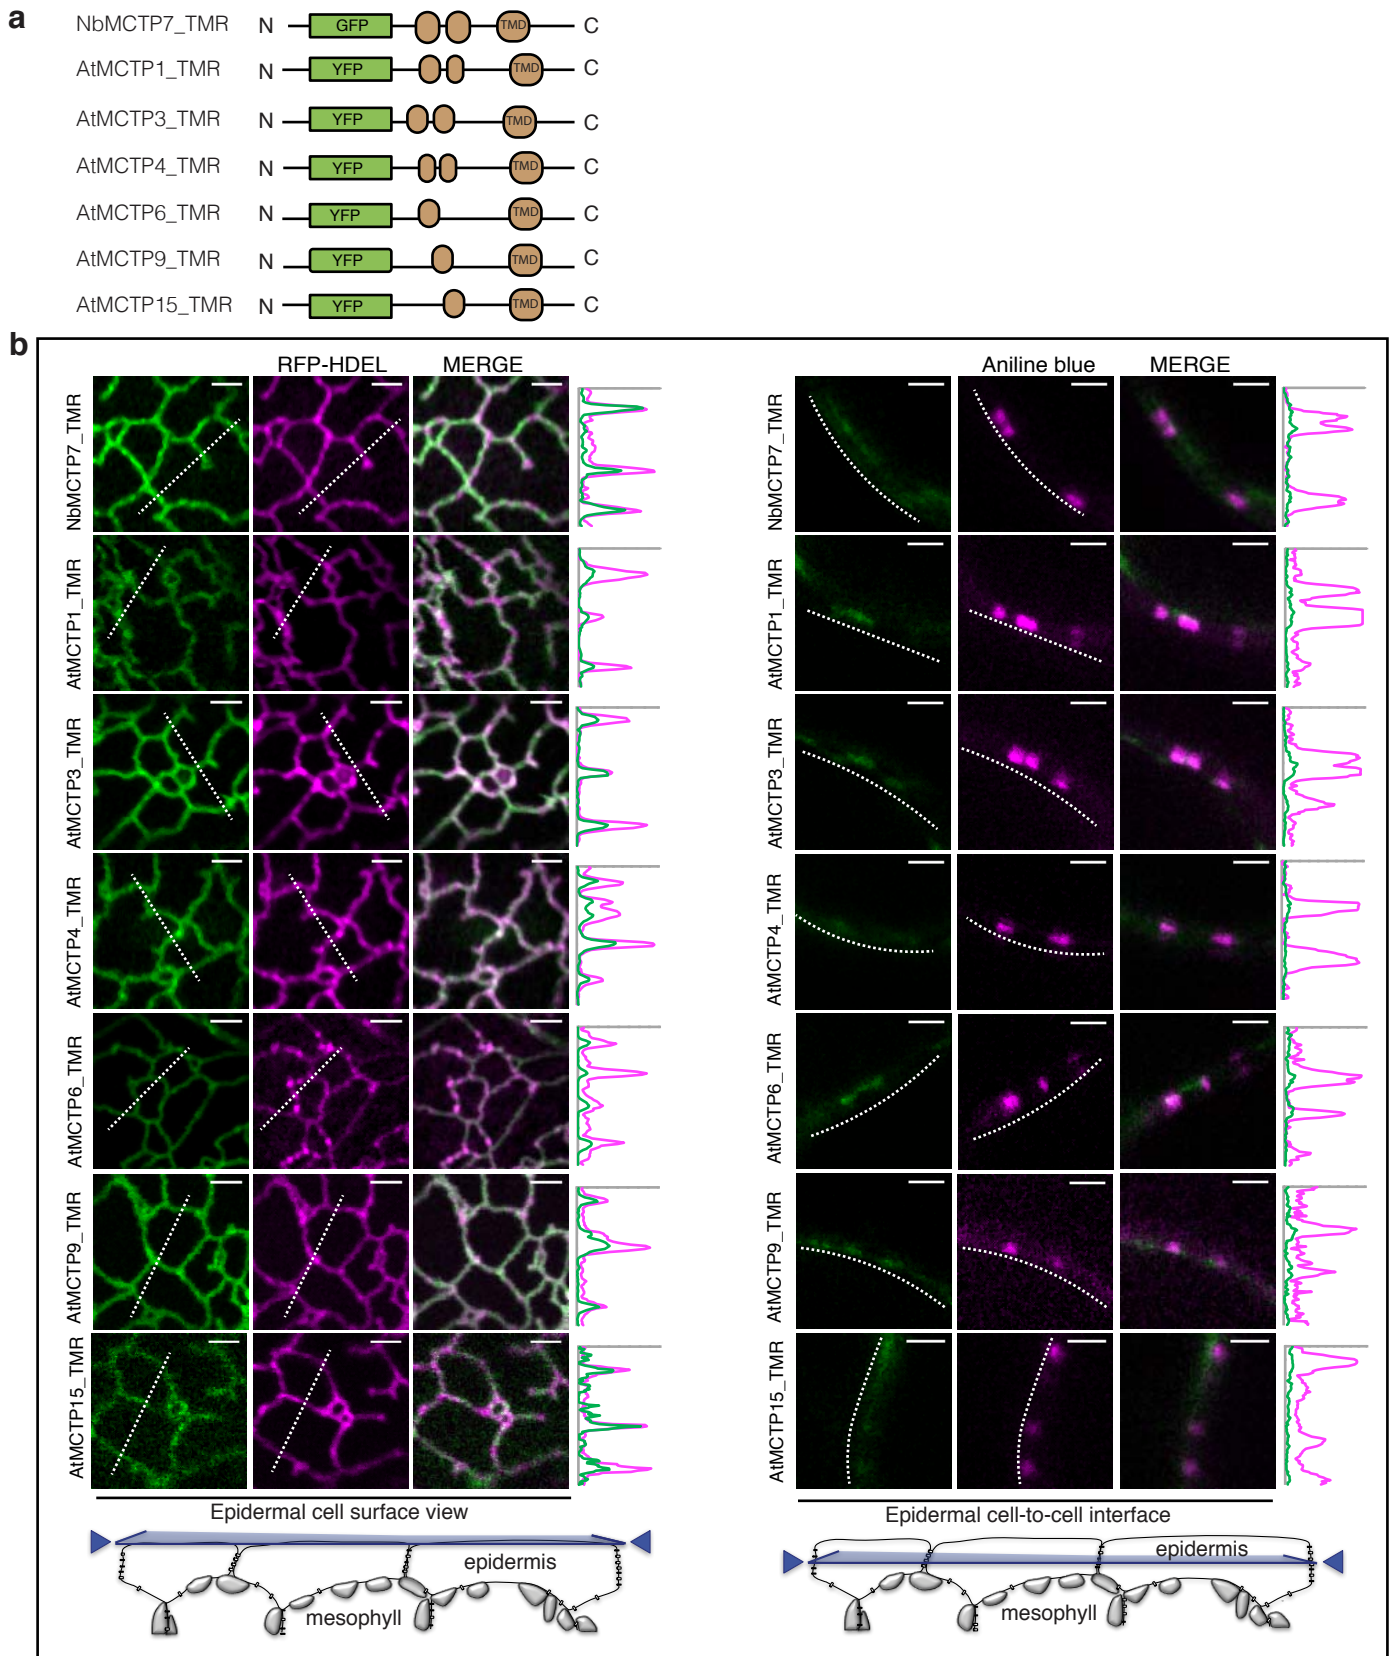

581 **Figure 4 | MCTPs insert into the ER membrane *via* their C-terminal transmembrane**  
582 **region.**

583 Localisation of truncated AtMCTP1, 3, 4, 6, 9, 15 and NbMCTP7 transmembrane regions  
584 (TMR) in *N. benthamiana* leaf epidermal cells. TMRs were tagged at their N-terminus with  
585 GFP/YFP and expressed transiently under moderate UBIQUITIN10 promoter. **a**, Schematic  
586 representation of truncated MCTPs tagged with GFP/YFP. **b**, Optical sections at cell surface  
587 (left) and cell-to-cell interface (right) showing the co-localisation between GFP/YFP-  
588 MCTP\_TMR constructs and the ER-marker RFP-HDEL (left) and the plasmodesmata marker  
589 aniline blue (right). Intensity plots along the white dashed lines are shown for each co-  
590 localisation pattern. When expressed in epidermal cells, GFP/YFP-MCTP\_TMR constructs  
591 associate with the ER but plasmodesmata association is lost. Scale bars, 2  $\mu$ m. **c**, The PD  
592 index of individual truncated MCTP\_TMR constructs is below 1 (red dashed line), similar to  
593 the ER marker RFP-HDEL confirming loss of plasmodesmata localisation.

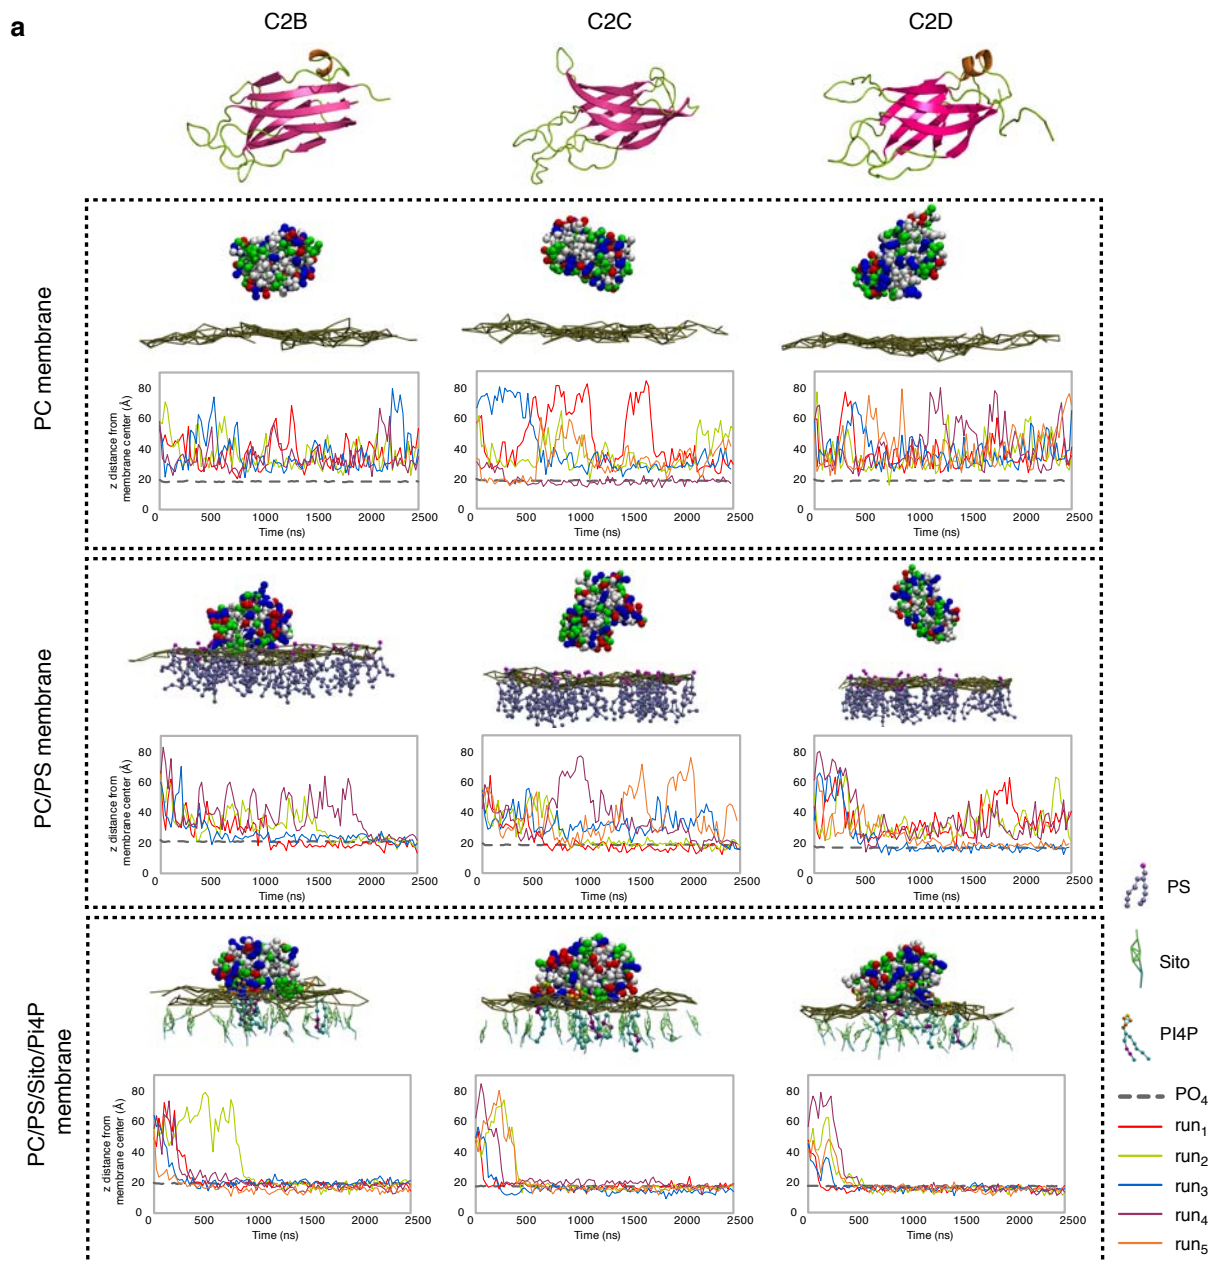



595 **Figure 5 | Anionic lipid-dependant membrane docking of AtMCTP4 C2 domains.**

596 **a**, Top: 3D-atomistic model of the individual AtMCTP4 C2 domains. Beta strands are shown  
597 in pink, loops in green and alpha helices in orange. Bottom: molecular dynamics of individual  
598 AtMCTP4 C2 domains with different biomimetic lipid bilayer compositions:  
599 phosphatidylcholine (PC) alone, with phosphatidylserine (PS)(PC/PS 3:1), and with PS,  
600 sitosterol (Sito) and phosphoinositol-4-phosphate (PI4P)(PC/PS/Sito/PI4P 57:19:20:4). The  
601 plots show the distance between the protein's closest residue to the membrane and the  
602 membrane center, over time. The membrane's phosphate plane is represented by a PO<sub>4</sub> grey  
603 line on the graphs and a dark green meshwork on the simulation image captures (above  
604 graphs). For individual C2 domain and a given lipid composition, the simulations were  
605 repeated four to five times (runs 1-5). C2 membrane docking was only considered as positive  
606 when a minimum of four independent repetitions showed similarly stable interaction with the  
607 membrane. All C2 domains of AtMCTP4 show membrane interaction when anionic lipid, and  
608 in particular PI4P, are present. The amino acid colour code is as follow: red, negatively  
609 charged (acidic) residues; blue, positively charged (basic) residues; green, polar uncharged  
610 residues; and white, hydrophobic residues. **b-c**, Confocal microscopy of *Arabidopsis* root  
611 epidermal cells of UB10:YFP-AtMCTP4 transgenic lines after 40 min treatment with DMSO  
612 (mock) and PAO (60 μM), an inhibitor of PI4 kinase. To confirm PI4P depletion upon PAO  
613 treatment we used the PI4P *Arabidopsis* sensor line 1xPH(FAPP1)(Simon *et al*, 2016). PAO  
614 treatment leads to a loss of plasmodesmal punctate signal at the cell periphery (apical-basal  
615 boundary is highlighted by white arrowheads in b) for YFP-AtMCTP4, and redistribution of  
616 PM-localised 1xPH(FAPP1) to the cytoplasm (b). c, Magnified boxed-regions from b and  
617 profile plot along the cell wall after DMSO (1) or PAO (2) treatment, respectively (arrows:  
618 plasmodesmal punctae). Scale bars, 5 μm in b and 2.5μm in c.

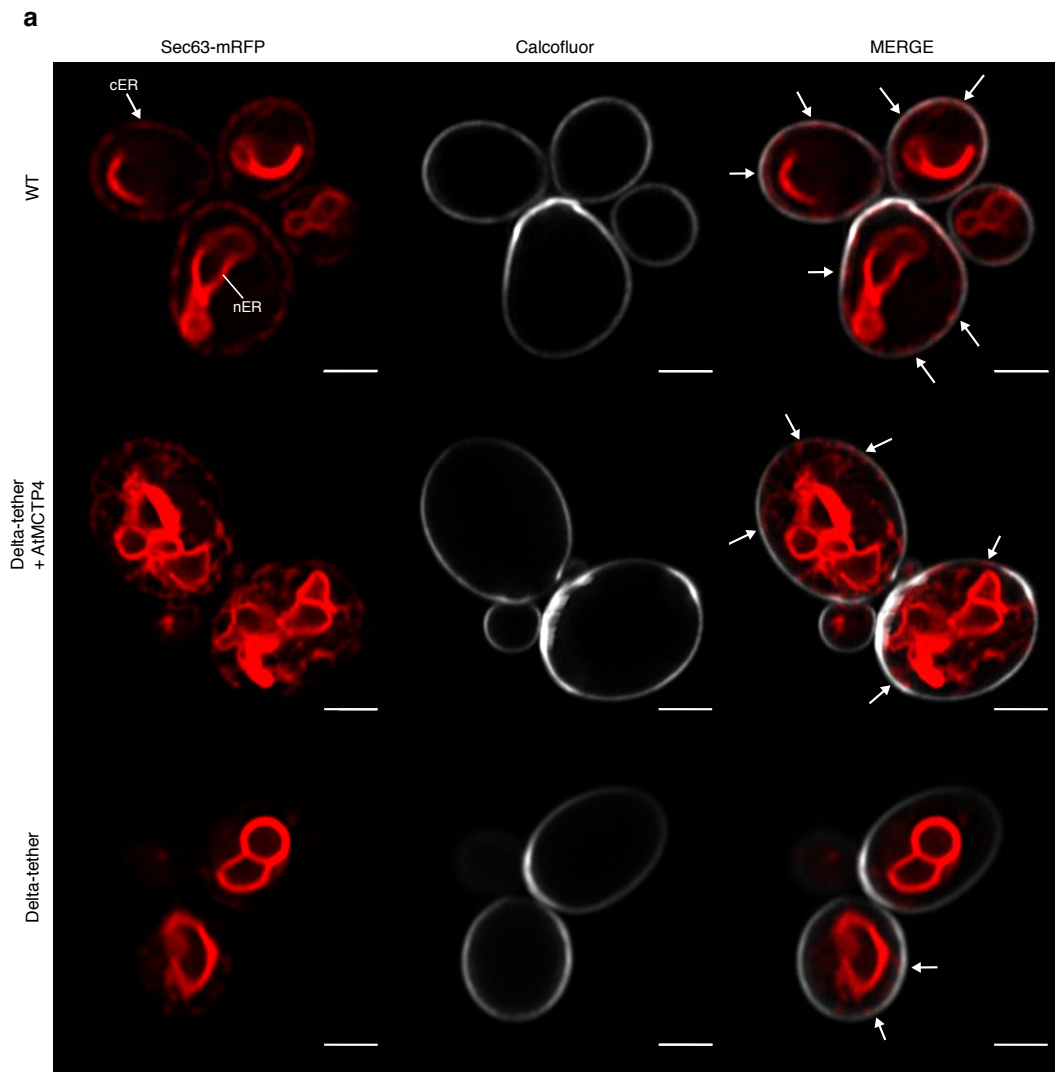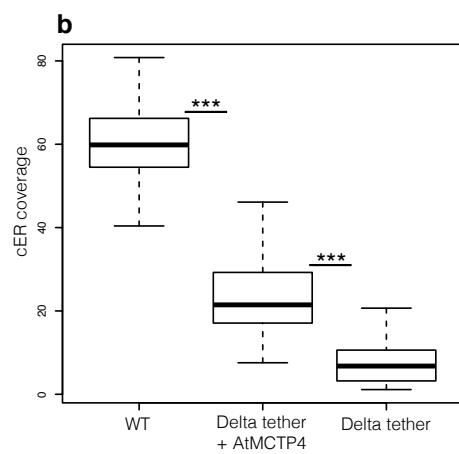

620 **Figure 6 | AtMCTP4 expression in yeast partially restores ER-PM membrane contact**  
621 **sites.**

622 Expression of AtMCTP4 in yeast  $\Delta$ tether cells (*ist2* $\Delta$ , *scs2/22* $\Delta$ , and *tcb1/2/3* $\Delta$ ) (Manford *et*  
623 *al*, 2012) followed by confocal microscopic analysis of cortical ER. **a**, Top to bottom: Wild  
624 type (WT) cell,  $\Delta$ tether expressing untagged AtMCTP4 and  $\Delta$ tether cells, respectively. The  
625 cortical ER (cER) and nuclear ER (nER) are labelled by the ER marker Sec63-RFP (red),  
626 while the cell periphery is stained by calcofluor (white). In WT cells, both nER and cER are  
627 visible, whereas in  $\Delta$ tether cell only remains of the cER are visible (arrows), due to the loss of  
628 ER-PM tethering factors. When AtMCTP4 is expressed in the yeast  $\Delta$ tether, partial recovery  
629 of cER is observable (arrows). Scale bars, 2  $\mu$ m. **b**, Quantification of cER expressed as a ratio  
630 of the length of cER to length of the PM in WT,  $\Delta$ tether+AtMCTP4 and  $\Delta$ tether cells.  
631 Numbers of cells used for quantifying the cER: n = 39 for WT, n=49 for  $\Delta$ tether+AtMCTP4  
632 and n=61 for  $\Delta$ tether strains. Wilcoxon test was used to compare the extent of cER between  
633 the different strains i.e. WT *versus*  $\Delta$ tether+AtMCTP4 and  $\Delta$ tether+AtMCTP4 *versus*  
634  $\Delta$ tether (\*\**p-value* < 0.001).

635

636

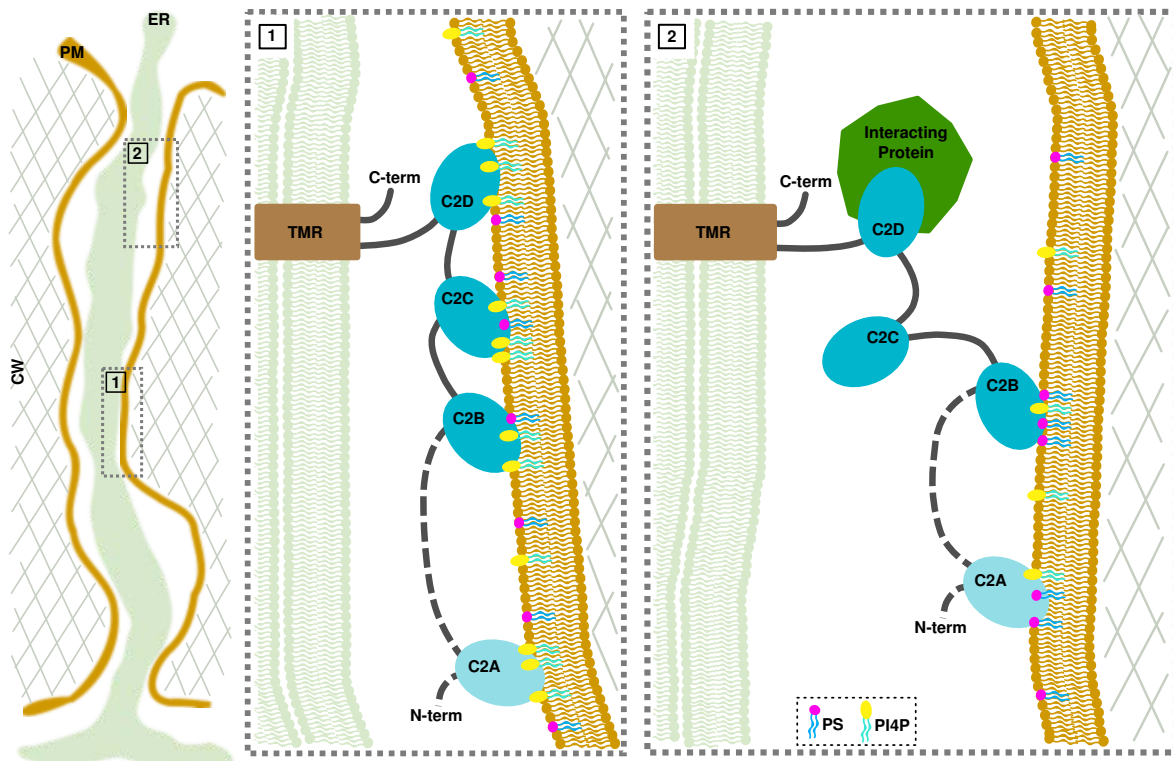

637

638 **Figure 7 | Model of MCTP arrangement within plasmodesmata and hypothetical**  
639 **conditional docking events.**

640 Inside plasmodesmata, MCTPs insert into the ER *via* their transmembrane regions (TMR),  
641 while docking to the PM by interacting with the negatively-charged phospholipids, PS and  
642 PI4P *via* their C2 domains. In condition of high PI4P/PS levels, all C2 domains interact with  
643 the PM, maintaining the ER close to the PM (panel 1). Decrease in the PI4P pool and/or  
644 protein interaction causes a detachment of some but not all C2 domains, which then modulate  
645 the space between the two membranes and the properties of the cytoplasmic sleeve. Please  
646 note that the exact topology of the TMR is not currently known.

**SUPPLEMENTARY DATA**

**a**

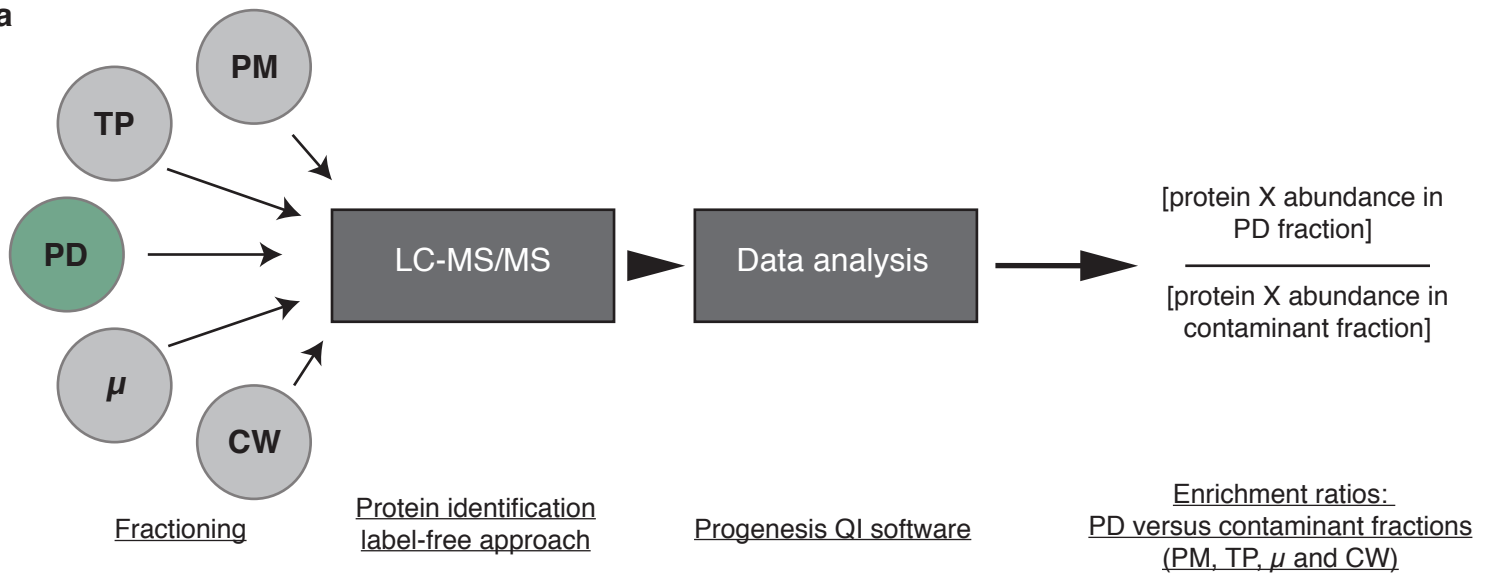

**b**

| Description                                                                          | Abundance         | Enrichment ratios |              |              |              | ER proteomes |    | PD association in <i>Arabidopsis</i> references |
|--------------------------------------------------------------------------------------|-------------------|-------------------|--------------|--------------|--------------|--------------|----|-------------------------------------------------|
|                                                                                      |                   | PD/PM             | PD/TP        | PD/ $\mu$    | PD/CW        | 1.           | 2. |                                                 |
| <b>Multiple C2 domains and Transmembrane region Protein 4,10,14 (MCTP4,10,14)</b>    | <b>2093561645</b> | <b>351,0</b>      | <b>223,6</b> | <b>360,1</b> | <b>70,2</b>  | x            | x  | —                                               |
| Beta-1-3-glucanase (AtBG_PAPP)                                                       | 1638015771        | 164,0             | 247,2        | 580,8        | 45,0         |              |    | 3.                                              |
| <b>Multiple C2 domains and Transmembrane region Protein 6,9 (MCTP6,9)</b>            | <b>776007012</b>  | <b>315,5</b>      | <b>115,1</b> | <b>285,3</b> | <b>61,7</b>  |              |    | —                                               |
| Plasmodesmata callose-binding protein 1 (PDCB1)                                      | 328259264         | 219,2             | 1052,3       | 623,0        | 48,0         |              |    | 4.                                              |
| Plasmodesmata-located protein 1 (PDLP1)                                              | 311480268         | <b>309,0</b>      | <b>119,0</b> | <b>307,6</b> | 46,4         |              |    | 5.                                              |
| Glucan synthase-like 12 (CALS3)                                                      | 257637656         | 14,5              | 56,4         | 67,3         | 65,2         |              |    | 6.                                              |
| O-Glycosyl hydrolases family 17 protein (beta1-3 glucanase, PdBG2)                   | 232481254         | 26,9              | 73,3         | 89,6         | 48,4         |              |    | 7.                                              |
| Plasmodesmata-located protein 6 (PDLP6)                                              | 159384568         | <b>193,7</b>      | <b>126,1</b> | <b>637,9</b> | 52,3         |              |    | 5.                                              |
| Plasmodesmata callose-binding protein 3 (PDCB3)                                      | 100145419         | 101,4             | 63,2         | 76,5         | 46,8         |              |    | 4.                                              |
| Plasmodesmata callose-binding protein 4 (PDCB4)                                      | 79562157          | 107,9             | 133,1        | 129,2        | 47,5         |              |    | 4.                                              |
| O-Glycosyl hydrolases family 17 protein (beta1-3 glucanase, PdBG3)                   | 71917917          | 32,9              | 204,2        | 237,4        | 59,5         |              |    | 7.                                              |
| Plasmodesmata-located protein 3 (PDLP3)                                              | 71730983          | <b>251,4</b>      | <b>90,8</b>  | <b>325,4</b> | 60,7         |              |    | 5.                                              |
| O-Glycosyl hydrolases family 17 protein (beta1-3 glucanase, PdBG1)                   | 65897722          | 42,7              | 148,4        | 287,3        | 52,3         |              |    | 7.                                              |
| LysM domain-containing GPI-anchored protein 2 (LYM2)                                 | 40630549          | 2,7               | 18,3         | 10,3         | 35,9         |              |    | 8.                                              |
| Plasmodesmata-located protein 2 (PDLP2)                                              | 38475248          | <b>172,0</b>      | 78,7         | 74,5         | 44,9         |              |    | 5.                                              |
| Callose synthase 1 (CALS1, GSL6)                                                     | 29840182          | 14,0              | 39,5         | 40,0         | 69,2         |              |    | 9.                                              |
| <b>Multiple C2 domains and Transmembrane region Protein 16 (MCTP16)</b>              | <b>23482273</b>   | <b>59,7</b>       | <b>33,5</b>  | <b>126,7</b> | <b>34,9</b>  | x            | x  | —                                               |
| <b>Multiple C2 domains and Transmembrane region Protein 3,7 (MCTP3,7)</b>            | <b>20441820</b>   | <b>47,5</b>       | <b>44,3</b>  | <b>96,9</b>  | <b>81,7</b>  | x            | x  | —                                               |
| <b>Multiple C2 domains and Transmembrane region Protein 15 (MCTP15, QUIRKY, QKY)</b> | <b>15148937</b>   | <b>79,0</b>       | <b>47,9</b>  | <b>82,9</b>  | <b>73,1</b>  |              |    | 10.                                             |
| <b>Multiple C2 domains and Transmembrane region Protein 5 (MCTP5)</b>                | <b>9974540</b>    | <b>102,5</b>      | <b>516,4</b> | <b>171,4</b> | <b>152,6</b> |              |    | —                                               |
| Leucine-rich repeat protein kinase family protein (SUB)                              | 6660962           | 31,8              | 40,7         | 68,3         | 55,6         |              |    | 10.                                             |
| Plasmodesmata-located protein 8 (PDLP8)                                              | 2101866           | <b>365,8</b>      | 32,1         | 214,6        | 48,5         |              |    | 5.                                              |

**References**

- Nikolovski, N. et al. Putative glycosyltransferases and other plant golgi apparatus proteins are revealed. *Plant Physiol.* 160, 1037–1051 (2012).
- Dunkley, T. P. J. et al. Mapping the Arabidopsis organelle proteome. *PNAS* 103, 6518–6523 (2006).
- Levy, A., Erlanger, M., Rosenthal, M. & Epel, B. L. A plasmodesmata-associated beta-1,3-glucanase in Arabidopsis. *Plant J.* 49, 669–682 (2007).
- Simpson, C., Thomas, C., Findlay, K., Bayer, E. & Maule, A. J. An Arabidopsis GPI-anchor plasmodesmal neck protein with callose binding activity and potential to regulate cell-to-cell trafficking. *Plant Cell* 21, 581–594 (2009).
- Thomas, C. L., Bayer, E. M., Ritzenthaler, C., Fernandez-Calvino, L. & Maule, A. J. Specific targeting of a plasmodesmal protein affecting cell-to-cell communication. *PLoS Biol.* 6, 0180–0190 (2008).
- Vatén, A. et al. Callose biosynthesis regulates symplastic trafficking during root development. *Dev. Cell* 21, 1144–1155 (2011).
- Benitez-Alfonso, Y. et al. Symplastic intercellular connectivity regulates lateral root patterning. *Dev. Cell* 26, 136–147 (2013).
- Faulkner, C. et al. LYM2-dependent chitin perception limits molecular flux via plasmodesmata. *Proc. Natl. Acad. Sci. U. S. A.* 110, 9166–70 (2013).
- Cui, W. & Lee, J.-Y. Arabidopsis callose synthases CalS1/8 regulate plasmodesmal permeability during stress. *Nat. Plants* 2, 16034 (2016).
- Vaddepalli, P. et al. The C2-domain protein QUIRKY and the receptor-like kinase STRUBBELIG localize to plasmodesmata and mediate tissue morphogenesis in *Arabidopsis thaliana*. *Development* 141, 4139–4148 (2014).

648 **Supplementary Figure 1.**

649 MCTP members are highly enriched in the *Arabidopsis* plasmodesmata core proteome.

650 (a) Label-free quantitation strategy was used to determine the relative abundance of proteins  
651 in the plasmodesmata (PD) fraction *versus* contaminant subcellular fractions namely, the PM,  
652 total extract (TP), microsomes ( $\mu$ ) and cell wall (CW).

653 (b) Selected set of proteins from the plasmodesmata core proteome (see Supplementary  
654 Table1 for the complete list) showing the abundance and enrichment ratios of known  
655 plasmodesmal proteins (reference to published papers is indicated below the table) and MCTP  
656 members (in bold). MCTP members are present in the plasmodesmal core proteome being  
657 both abundant and highly enriched (from 47.5- to 351-folds compared to the PM) similar to  
658 known plasmodesmata proteins. Please note that in some cases, the identified peptides did not  
659 permit unambiguous identification of MCTP isoforms due to high sequence homology  
660 between several members. The different shades (light to dark) of brown represent different  
661 enrichment levels (0-10; 10-20; 20-100 and above 100).

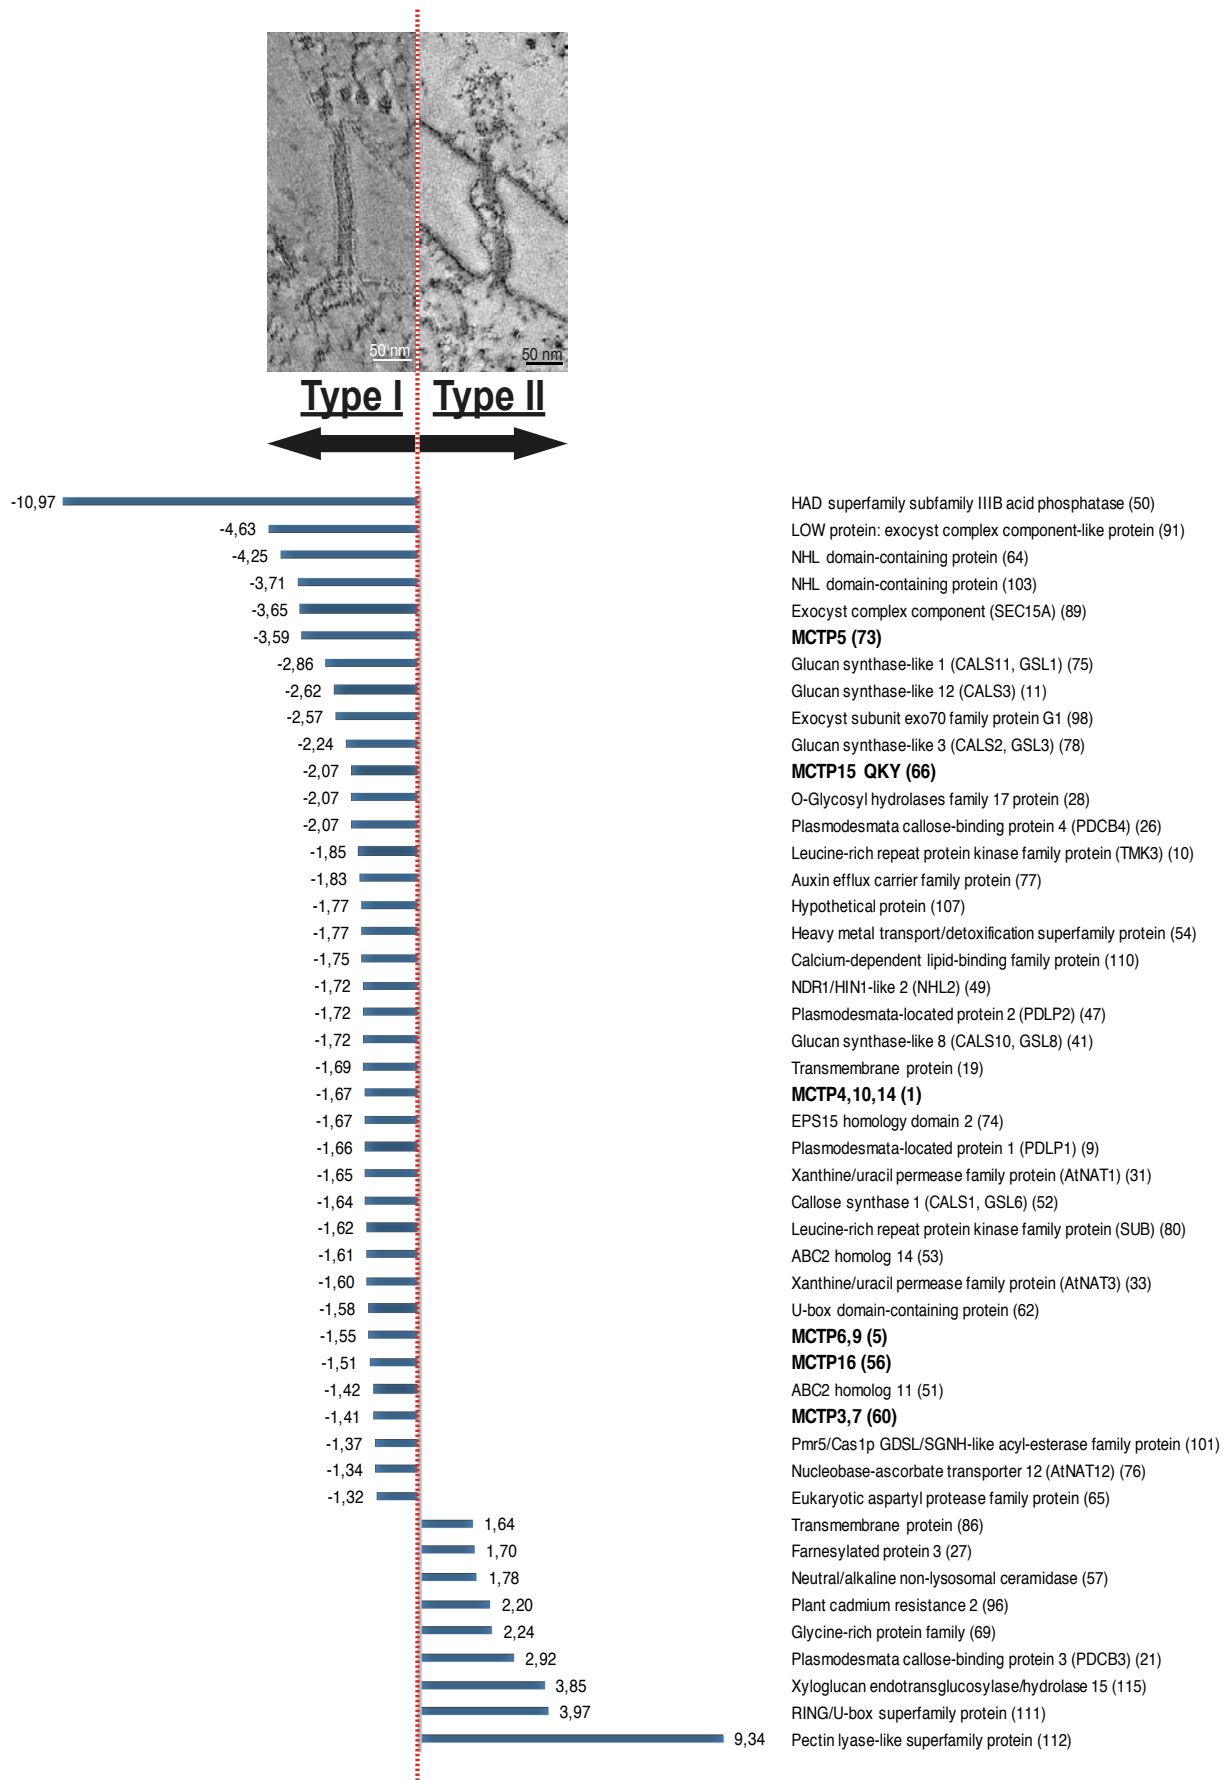

662

663

664 **Supplementary Figure 2.**

665 Differential abundance of core *Arabidopsis* plasmodesmal proteins in type I (four day old  
666 cultured cells) versus type II (seven day old cells) plasmodesmata.

667 In *Arabidopsis* cultured cells, transition from type I to type II plasmodesmata is associated  
668 with a change in ER-PM contact site architecture, from very tight contact (~3 nm) with no  
669 visible cytoplasmic sleeve (type I) to larger ER-PM distance (10 nm to more) with an electron  
670 lucent cytosolic sleeve and sparse spoke-like elements (type II)(Nicolas *et al*, 2017a). We  
671 analysed the plasmodesmata proteome from four days old cultured cells where type I  
672 plasmodesmata represent 70% of the total plasmodesmata population and at seven days where  
673 this proportion is reversed and type II become predominant(Nicolas *et al*, 2017a). Results  
674 show that 47 proteins from the plasmodesmata core proteome are differentially enriched at  
675 either type I or type II plasmodesmata, including all members of MCTPs (in bold), which are  
676 more abundant (1.4 to 3.6 folds) in type I plasmodesmata. Numbers in brackets correspondent  
677 to the protein numbering in Suppl. Table 1.

678

679

680

681

682

683

684

685

686

687

688

689

690

691

692



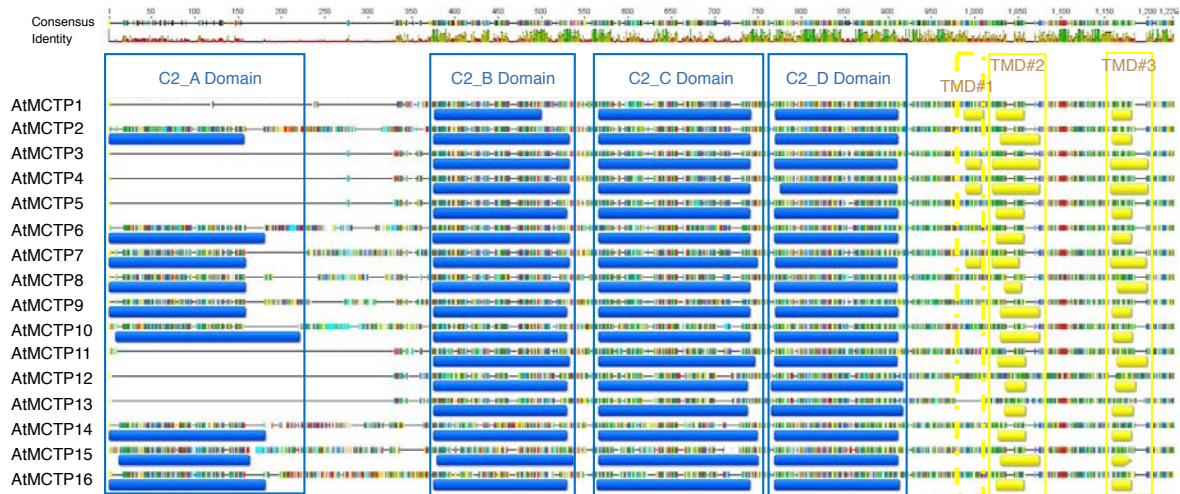

693

694

### 695 **Supplementary Figure 3.**

696 Domain organisation of the *Arabidopsis* MCTP protein family.

697 Alignment of the 16 MCTP proteins of *A. thaliana*. C2 domains are represented in blue and  
698 transmembrane domains (TMD) in yellow. Each coloured vertical bars represents specific  
699 amino acid. The consensus sequence and the percentage of identity are represented on the top  
700 of the alignment. Note that for every MCTP member the C2 domains were individually  
701 delimited using a combination of prediction methods (see M&M for details).

702

703

704

705

706

707

708

709

710

711

712

713

714

715

716

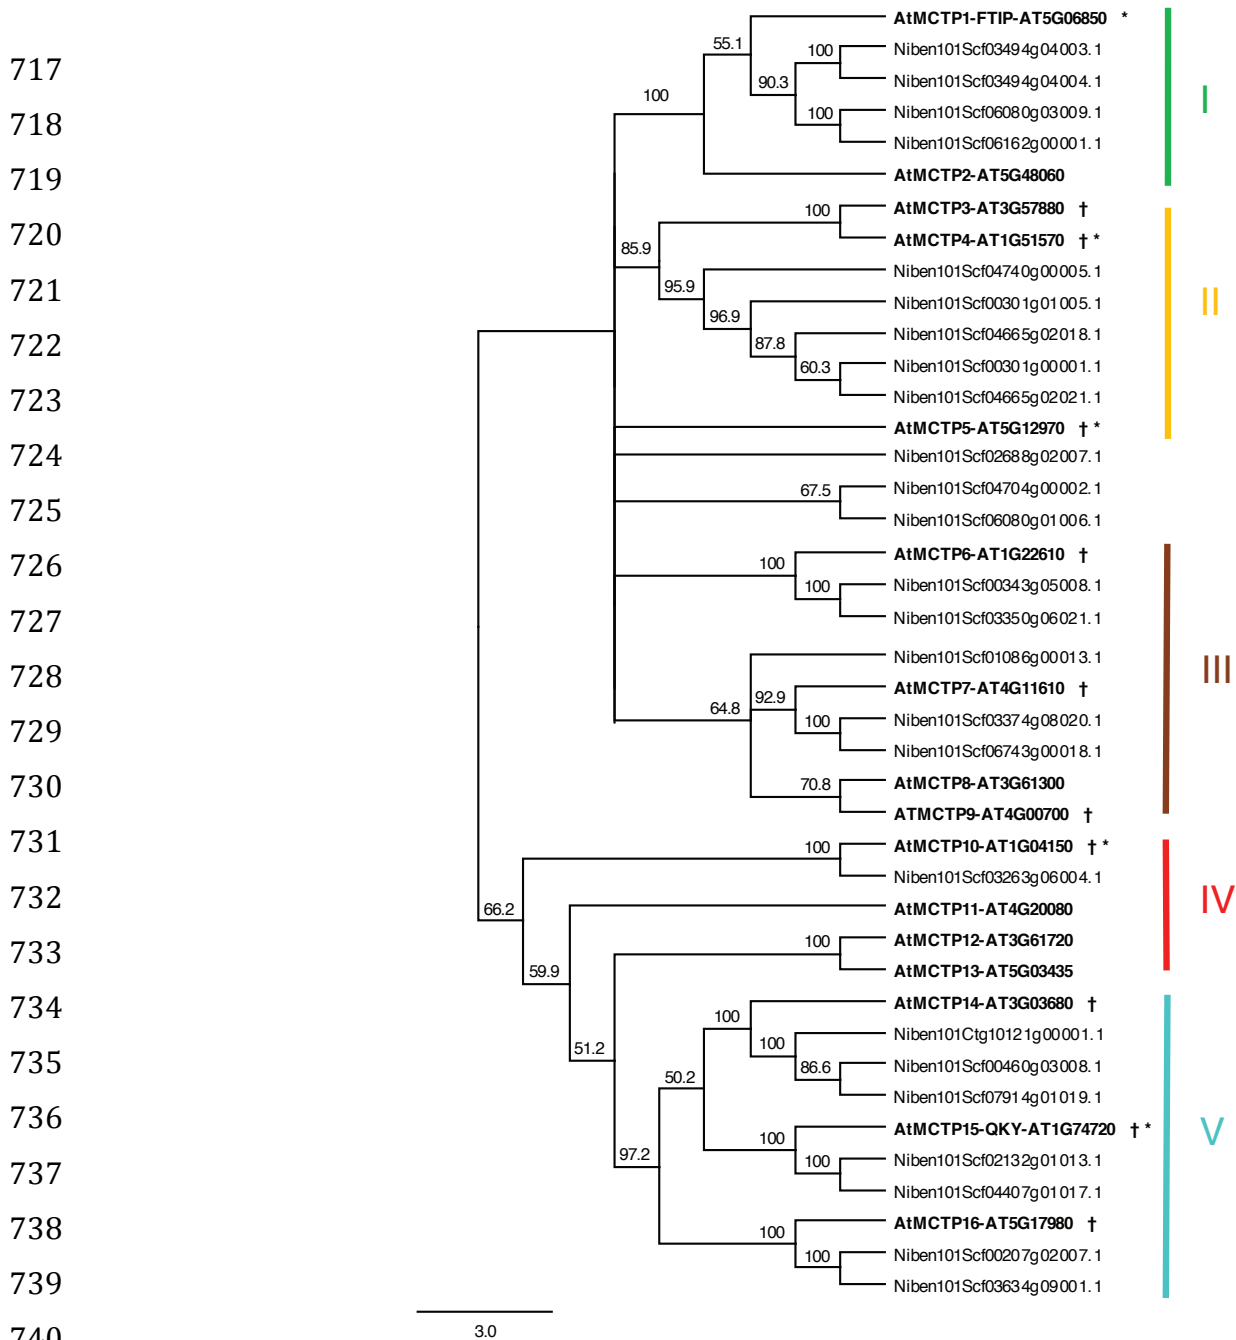

#### 742 **Supplementary Figure 4.**

743 Phylogenetic tree of *A. thaliana* and *N. benthamiana* MCTP proteins. Amino acid sequences  
744 of MCTP family from *A. thaliana* and *N. benthamiana* were aligned with  
745 CLUSTALW(Thompson *et al*, 1997). The resulting alignment was adjusted manually and  
746 used to construct an unrooted phylogenetic tree using the neighbour-joining algorithm with  
747 Geneious 8.0.5 (<https://www.geneious.com>). Bootstrap values for 1000 re-samplings are  
748 shown on each branch. † indicates the MCTP members enriched in the plasmodesmata  
749 proteome and \* indicates the MCTP members enriched in type I plasmodesmata. The five  
750 clades defined in Liu *et al.* 2017(Liu *et al.*, 2017) are indicated from I to V.

751

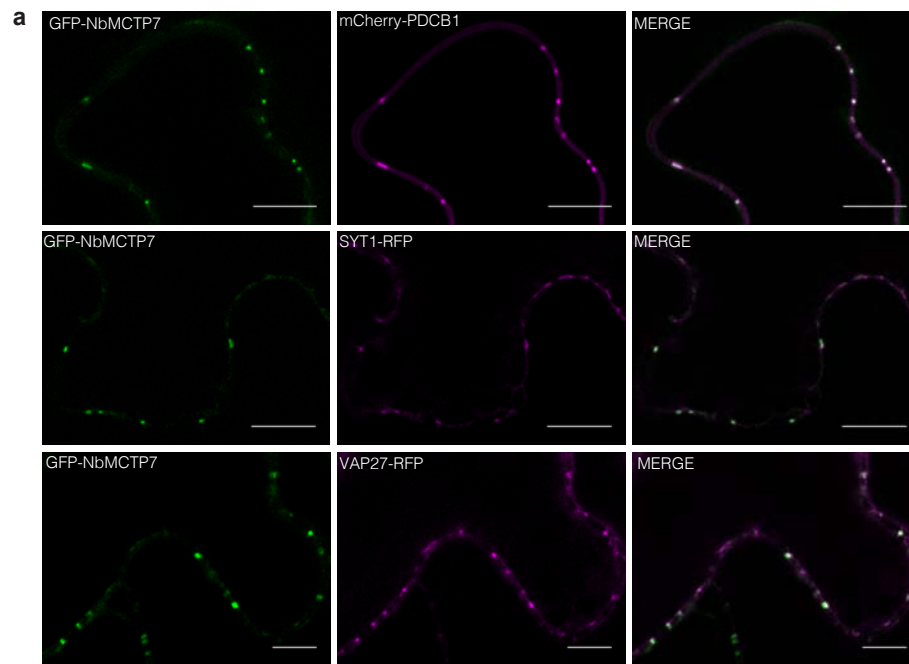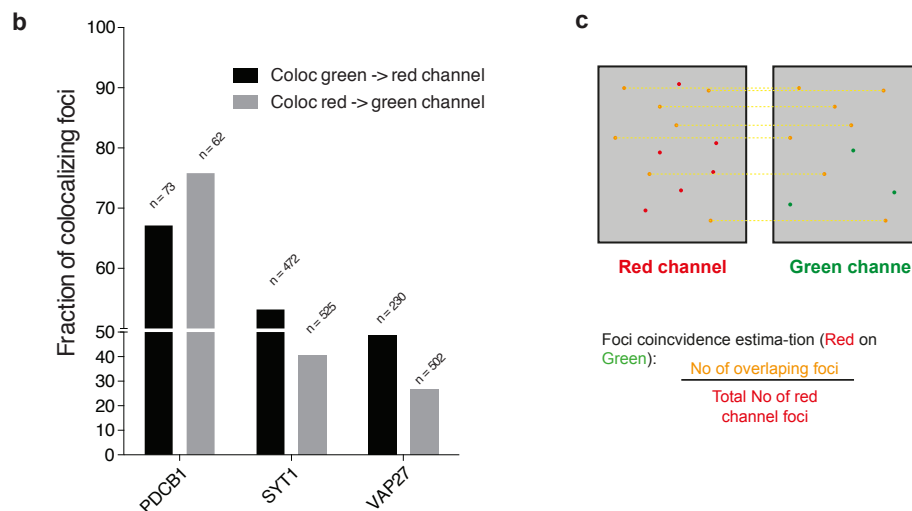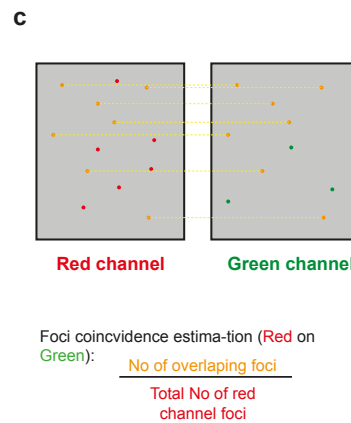

752 **Supplementary Figure 5.**

753 NbMCTP7 only partially co-localise with peripheral ER-PM contact sites.

754 (a) Co-localisation between GFP-NbMCTP7 with mCHERRY-PDCB1 and two well-  
 755 established markers of peripheral ER-PM contact sites, VAP27.1(Wang *et al*, 2016) and  
 756 SYT1(Pérez-Sancho *et al*, 2015a; Levy *et al*, 2015), in *N. benthamiana* epidermal cells  
 757 visualised by confocal microscopy. Scale bars, 10  $\mu$ m.

758 (b) Plot of the coincidence ratios. “Coloc green -> red channel” depicts the proportion of foci  
 759 in the green channel overlapping with foci of the red channel over the total number of foci in  
 760 the green channel. “Coloc red -> green channel” depicts this same proportion but of the red  
 761 foci over the green foci. Coefficients range from 0 (complete exclusion) to 100% (complete  
 762 colocalization of all foci). N indicated is the number of foci counted over 10 images of a  
 763 given condition acquired over multiple co-expression/imaging sessions.

764 (c) Cartoon schematic on how the Coincidence ratio is calculated.

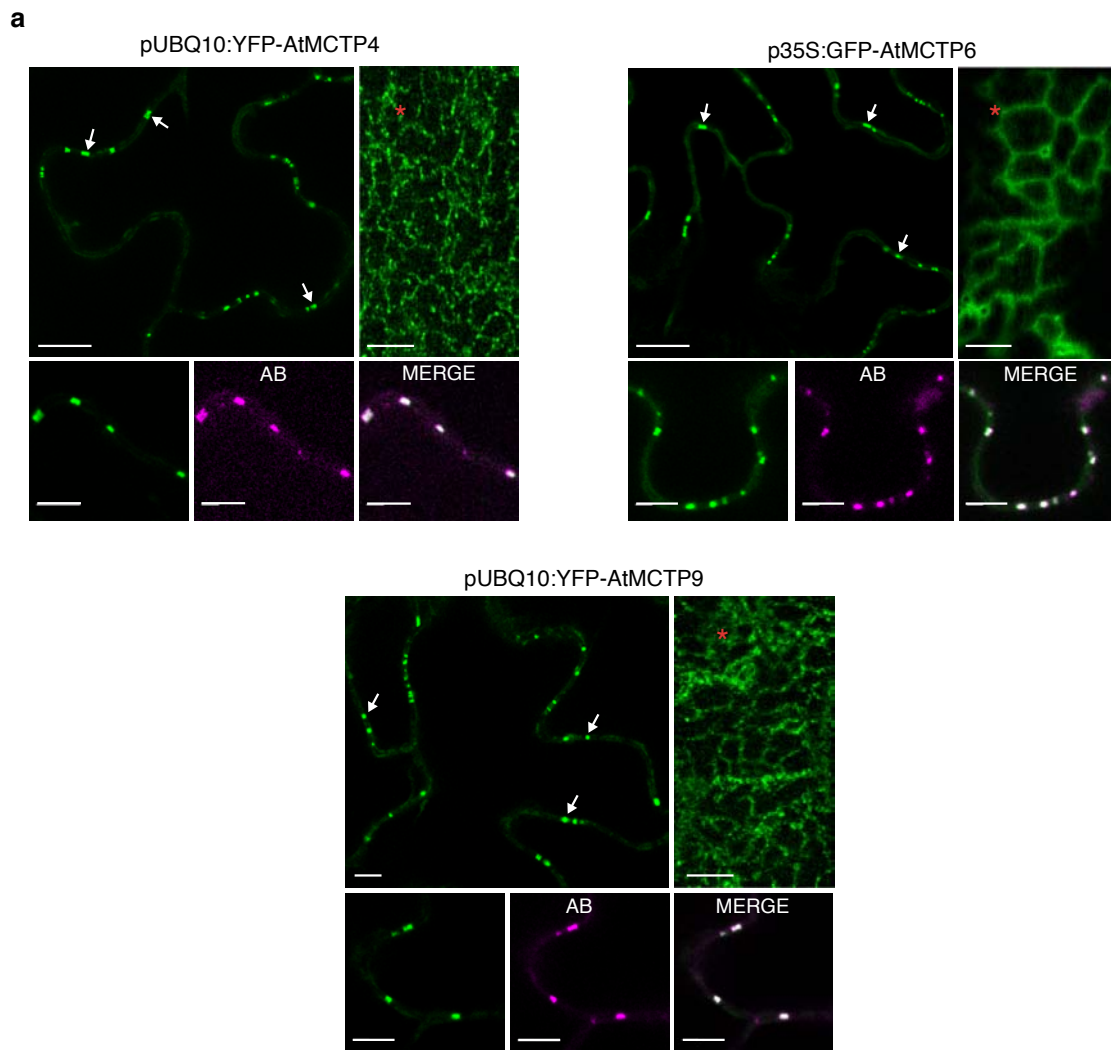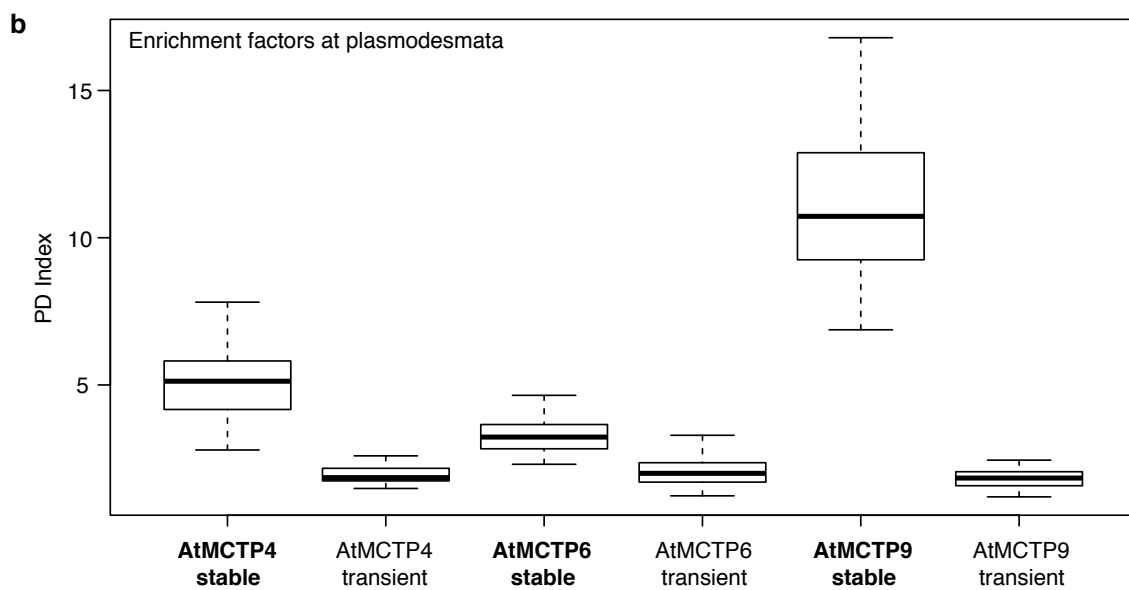

765

766

767 **Supplementary Figure 6.**

768 Subcellular localisation pattern of AtMCTP4, AtMCTP6 and AtMCTP9 when stably  
769 expressed in *Arabidopsis*.

770 (a) Subcellular localisation of pUB10:YFP-AtMCTP4, 35S:GFP-MCTP6 and pUB10:YFP-  
771 AtMCTP9 in transgenic *Arabidopsis* epidermal cells showing typical plasmodesmata punctate  
772 pattern at the cell periphery (white arrows) and reticulated ER pattern at the cell surface (red  
773 stars). Plasmodesmal localisation was confirmed by aniline blue (AB) co-staining. Scale bars,  
774 5  $\mu\text{m}$ .

775 (b) Plasmodesmata (PD) index of *Arabidopsis* MCTPs when either stably expressed  
776 transgenic *Arabidopsis*, or transiently expressed in *N. benthamiana*, showing consistently  
777 increased plasmodesmata association in transgenic lines.

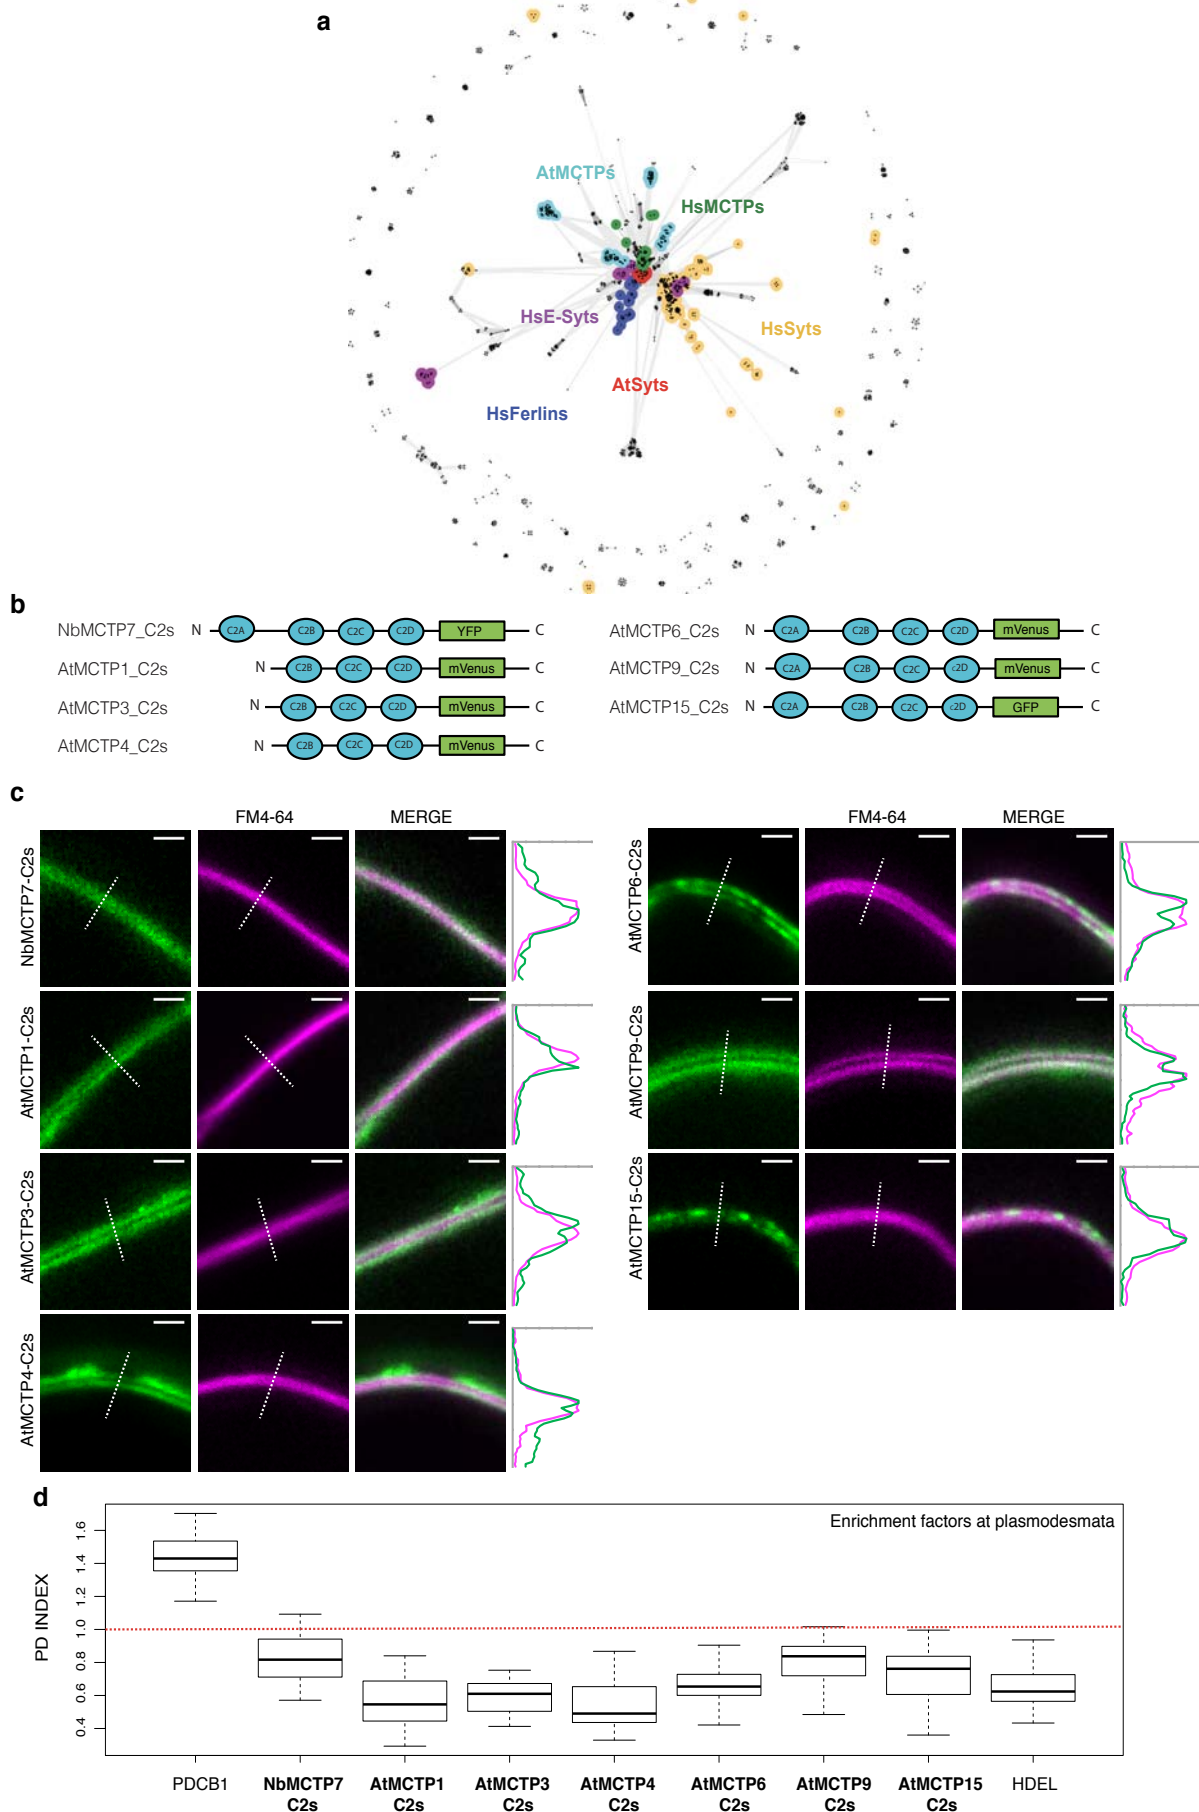

779 **Supplementary Figure 7.**

780

781 (a) Cluster map of human and *A. thaliana* C2 domains. Homologs of the four *A. thaliana*  
782 MCTP C2 domains were searched for in the human and *A. thaliana* proteomes using HHpred  
783 with a probability cut-off of 50% and with 'No. of target sequences' set to 10000. The  
784 obtained sequences were filtered to a maximum pairwise sequence identity of 100%, at a  
785 length coverage of 70%, using MMseqs2 (cite PMID: 29035372) to eliminate redundant  
786 sequences. The sequences in the filtered set, comprising almost all human and *A. thaliana* C2  
787 domains, were next clustered in CLANS based on their all-against-all pairwise sequence  
788 similarities as evaluated by BLAST P-values (PMID: 9254694). Clustering was done to  
789 equilibrium in 2D at a P-value cutoff of e-10 using default settings. In the map, dots represent  
790 sequences and line coloring reflects the strength of sequence similarity between them; the  
791 darker a line, the lower the P-value. Proteins not discussed in the manuscript are not colored.

792 (b-d) The C2 blocks (C2A-D or C2B-D) of AtMCTP1, 3, 4, 6, 9, 15 and NbMCTP7 were  
793 tagged at their C-terminus with a fluorescent tag and expressed transiently in *N. benthamiana*  
794 leaves under moderate ubiquitin 10 promoter. b, Schematic representation of truncated  
795 MCTPs tagged with a fluorescent tag. c, Localisation of truncated AtMCTP1, 3, 4, 6, 9, 15  
796 and NbMCTP7 C2 blocks (MCTP-C2s) in *N. benthamiana* epidermal cells by confocal  
797 microscopy. The PM was stained using short-term (up to 15 min) FM4-64 staining (magenta).  
798 Intensity plots are shown for each co-localisation pattern. When expressed in epidermal cells,  
799 MCTP-C2s-YFP constructs only partially associate with the PM and cytosolic localisation is  
800 also apparent. Scale bars, 5  $\mu$ m. d, The PD index of individual truncated MCTP\_C2s  
801 constructs is below 1 (red dashed line), indicating loss of plasmodesmata localisation.

**a NbMCTP7**

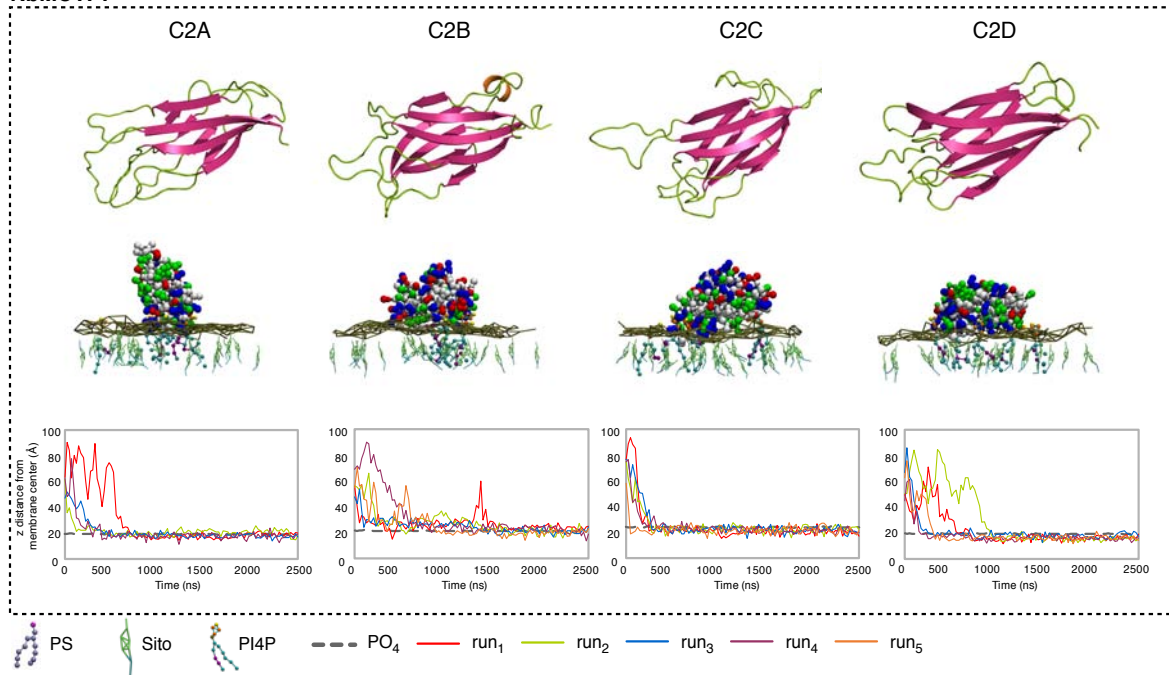

**b AtMCTP15 (QUIRKY)**

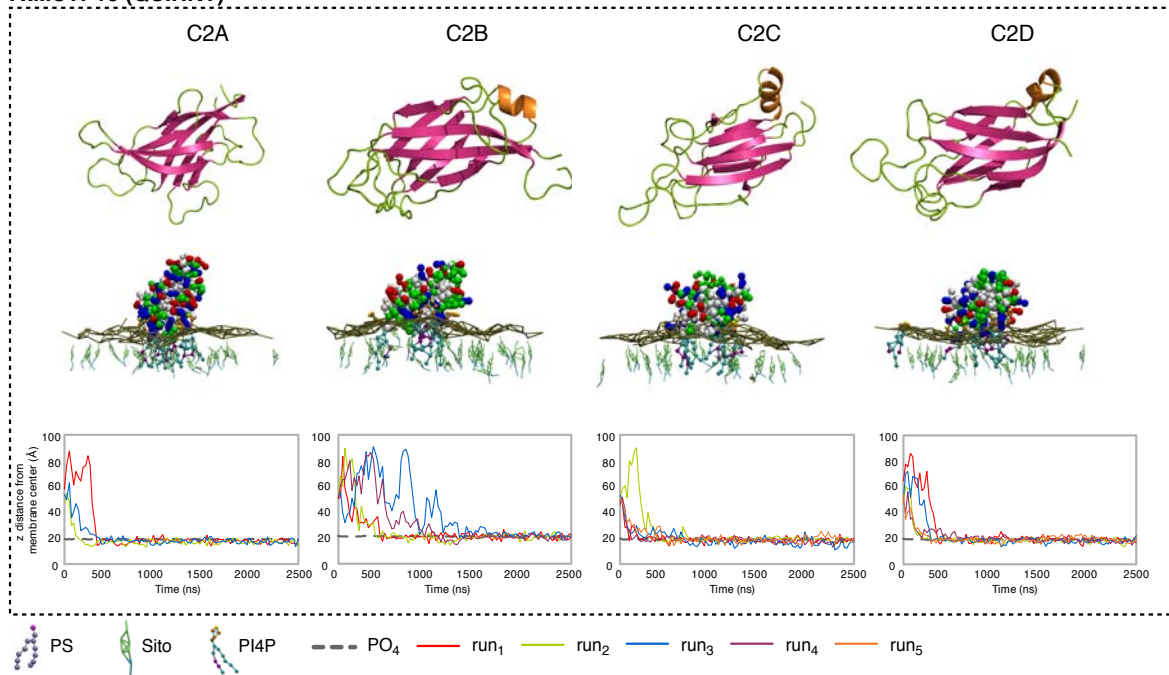

802

803 **Supplementary Figure 8.**

804 Membrane docking of NbMCTP7 and AtMCTP15/QKY C2 domains on a PM-like  
805 membrane.

806 In (a) and (b); Top: 3D-atomistic model of the individual AtMCTP4 C2 domains. Beta strands  
807 are shown in pink, loops in green and alpha helices in orange. Bottom: molecular dynamics of  
808 individual NbMCTP7 (a) and AtMCTP15/QKY (b) C2 domains with phosphatidylcholine



809 (PC), phosphatidylserine (PS), sitosterol (Sito) and phosphoinositol-4-phosphate (PI4P)  
810 (PC/PS/Sito/PI4P 57:19:20:4) biomimetic lipid bilayer. The plots show the minimal distance  
811 between the protein's closest residue to the membrane and the membrane center, over time.  
812 The membrane's phosphate plane is represented by a PO<sub>4</sub> grey line on the graphs and a dark  
813 green meshwork on the simulation image captures (above graphs). For individual C2 domain,  
814 the simulations were repeated three to five times (runs 1-5). C2 membrane docking was only  
815 considered as positive when a minimum of three independent repetitions showed similarly  
816 stable interaction with the membrane. All C2 domains of NbMCTP7 and AtMCTP15/QKY  
817 show membrane interaction with a "PM-like" membrane composition, mainly due to the  
818 presence of PI4P. The amino acid colour code is as follow: red, negatively charged (acidic)  
819 residues; blue, positively charged (basic) residues; green, polar uncharged residues; and  
820 white, hydrophobic residues.

821

822

| Candidat number | Primary Accession | Secondary Accessions                                                    | Description                                                                    | Abundance  | Enrichment ratios |       |        |       | Presence in published ER proteomes |                  | PD association in Arabidopsis references |
|-----------------|-------------------|-------------------------------------------------------------------------|--------------------------------------------------------------------------------|------------|-------------------|-------|--------|-------|------------------------------------|------------------|------------------------------------------|
|                 |                   |                                                                         |                                                                                |            | PDP/M             | PD/P  | PD//   | PD/CW | Nikolovski et al. 1                | Dunkley et al. 2 |                                          |
| 1               | AT1G51570.1       | AT1G51570.1;AT1G04150.1;AT1G03680.1;AT5G43740.1;AT5G44760.1             | Multiple C2 domains and Transmembrane region Protein 4,10,14 (MCTP4,10,14)     | 2093561645 | 351.0             | 223.6 | 360.1  | 70.2  |                                    | x                |                                          |
| 2               | AT5G42100.2       | AT5G42100.2;AT5G42100.1                                                 | Beta-1,3-glucanase (AIBG_PAPP)                                                 | 1638015771 | 164.0             | 247.2 | 580.8  | 70.2  |                                    |                  | 3                                        |
| 3               | AT4G16380.1       | AT4G16380.1;AT4G16380.2;AT4G16380.3;AT4G16380.4                         | Heavy metal transport/detoxification superfamily protein                       | 1355301110 | 1022.7            | 478.1 | 1318.4 | 42.8  |                                    |                  |                                          |
| 4               | AT5G62890.1       | AT5G62890.1;AT5G62890.4                                                 | Xanthine/uracil permease family protein (AINAT6)                               | 1135511813 | 772.6             | 730.3 | 1308.9 | 61.0  |                                    | x                |                                          |
| 5               | AT1G2610.1        | AT1G2610.1;AT1G00700.1                                                  | Multiple C2 domains and Transmembrane region Protein 6.9 (MCTP6.9)             | 776007012  | 315.5             | 115.1 | 285.3  | 96.7  |                                    |                  |                                          |
| 6               | AT3G52470.1       | AT3G52470.1;AT3G52470.2;AT3G52470.3                                     | Late embryogenesis abundant (LEA) hydroxyproline-rich glycoprotein family      | 6433356656 | 123.3             | 137.5 | 323.3  | 97.4  |                                    |                  |                                          |
| 7               | AT5G16510.1       | AT5G16510.1                                                             | Alpha-1-4-glucanase family protein                                             | 494288348  | 89.2              | 206.1 | 772.3  | 89.8  |                                    |                  |                                          |
| 8               | AT5G61920.1       | AT5G61920.1                                                             | Plasmodesmata-callose-binding protein 1 (PDCB1)                                | 3382552094 | 219.3             | 105.3 | 620.1  | 48.0  |                                    |                  | 4                                        |
| 9               | AT5G43980.1       | AT5G43980.1                                                             | Plasmodesmata-callose-binding protein 1 (PDCB1)                                | 311489258  | 209.0             | 112.0 | 307.6  | 64.4  |                                    |                  | 5                                        |
| 10              | AT2G01820.1       | AT2G01820.1                                                             | Leucine-rich repeat protein kinase family protein (TMK3)                       | 285891910  | 28.9              | 60.4  | 137.5  | 241.7 |                                    |                  |                                          |
| 11              | AT5G13000.1       | AT5G13000.1;AT3G14570.1;AT3G14570.2;AT3G14570.3;AT3G14780.1;AT5G13000.2 | Glucan synthase-like 12 (CALSS)                                                | 257837656  | 14.5              | 56.4  | 67.3   | 65.2  |                                    |                  | 6                                        |
| 12              | AT5G06320.1       | AT5G06320.1                                                             | NDRI/HHN1-like 3 (NHL3)                                                        | 251025320  | 47.8              | 104.2 | 95.4   | 41.6  |                                    |                  |                                          |
| 13              | AT3G051740.1      | AT3G051740.1;AT3G56100.1                                                | Infinorecose meristem receptor-like kinase 2 (IMK2)                            | 245842528  | 17.5              | 43.5  | 57.1   | 52.5  |                                    |                  |                                          |
| 14              | AT2G01630.1       | AT2G01630.1;AT2G01630.2;AT2G01630.3                                     | D-Glycosyl hydrolases family 17 protein (beta1-3 glucanase, PUBG2)             | 232481254  | 26.9              | 73.3  | 89.6   | 48.4  |                                    |                  | 7                                        |
| 15              | AT5G48450.1       | AT5G48450.1;AT5G48450.2                                                 | SKUS similar 3                                                                 | 204842485  | 62.4              | 42.9  | 75.0   | 52.7  |                                    |                  |                                          |
| 16              | AT5G46700.1       | AT5G46700.1                                                             | Tetraspanin family protein (TNP2, TET1)                                        | 190712794  | 92.2              | 278.8 | 253.8  | 286.1 |                                    |                  |                                          |
| 17              | AT1G60300.1       | AT1G60300.1                                                             | Nucleoside-ascorbate transporter 7 (ANAT7)                                     | 175342944  | 29.0              | 54.6  | 48.1   | 42.0  |                                    |                  |                                          |
| 18              | AT2G01660.1       | AT2G01660.1;AT2G01660.2;AT2G01660.3                                     | Plasmodesmata-callose-binding protein 6 (PDC6)                                 | 155384558  | 163.7             | 126.1 | 637.9  | 52.3  |                                    |                  | 5                                        |
| 19              | AT2G25270.1       | AT2G25270.1                                                             | Transmembrane protein                                                          | 139593159  | 152.4             | 156.1 | 198.2  | 74.8  |                                    |                  |                                          |
| 20              | AT1G20900.1       | AT1G20900.1;AT1G62320.1;AT1G62320.2;AT1G62320.3;AT1G62320.4             | Early-responsive to dehydration stress protein (ERD4)                          | 111499705  | 17.7              | 40.0  | 82.5   | 68.4  |                                    |                  |                                          |
| 21              | AT1G18650.1       | AT1G18650.1;AT1G18650.2                                                 | Plasmodesmata callose-binding protein 3 (PDC3)                                 | 100145419  | 101.4             | 63.2  | 76.5   | 65.6  |                                    |                  | 4                                        |
| 22              | AT2G23810.1       | AT2G23810.1                                                             | Tetraspanin 8 (TET8)                                                           | 97572093   | 98.9              | 73.8  | 180.3  | 60.9  |                                    |                  |                                          |
| 23              | AT3G11660.1       | AT3G11660.1                                                             | NDRI/HHN1-like 1 (NHL1)                                                        | 83423848   | 57.1              | 62.0  | 70.9   | 77.1  |                                    |                  |                                          |
| 24              | AT3G54200.1       | AT3G54200.1                                                             | Late embryogenesis abundant (LEA) hydroxyproline-rich glycoprotein family      | 81984458   | 116.8             | 197.0 | 89.5   | 48.8  |                                    |                  |                                          |
| 25              | AT1G02960.1       | AT1G02960.1;AT1G62360.2                                                 | D-Glycosyl hydrolases family 17 protein                                        | 79706149   | 63.0              | 70.0  | 155.8  | 47.5  |                                    |                  |                                          |
| 26              | AT1G09295.1       | AT1G09295.1;AT1G26450.1;AT1G69295.2                                     | Plasmodesmata-callose-binding protein 4 (PDC4)                                 | 75521217   | 107.8             | 133.1 | 129.2  | 47.5  |                                    |                  | 4                                        |
| 27              | AT5G63530.2       | AT5G63530.2;AT5G63530.1                                                 | Farnesylated protein 3                                                         | 76840500   | 153.5             | 83.4  | 157.5  | 41.7  |                                    |                  |                                          |
| 28              | AT1G66250.1       | AT1G66250.1                                                             | D-Glycosyl hydrolases family 17 protein (beta1-3 glucanase, PUBG3)             | 71817917   | 32.9              | 204.2 | 237.4  | 59.5  |                                    |                  | 7                                        |
| 29              | AT2G33330.1       | AT2G33330.1                                                             | Plasmodesmata-callose-binding protein 3 (PDC3)                                 | 71730983   | 251.4             | 90.8  | 325.4  | 60.7  |                                    |                  | 5                                        |
| 30              | AT1G32060.1       | AT1G32060.1                                                             | Phosphoribulokinase                                                            | 71318252   | 19.8              | 76.5  | 134.0  | 78.0  |                                    |                  |                                          |
| 31              | AT2G05760.1       | AT2G05760.1                                                             | Xanthine/uracil permease family protein (AINAT1)                               | 69482508   | 274.8             | 452.3 | 702.1  | 46.0  |                                    |                  |                                          |
| 32              | AT4G34150.1       | AT4G34150.1                                                             | Calcium-dependent lipid-binding family protein Soc C-term domain charged block | 67987684   | 270.2             | 32.9  | 225.9  | 178.7 |                                    |                  |                                          |
| 33              | AT2G2610.1        | AT2G2610.1;AT2G2610.2;AT2G2610.3                                        | Xanthine/uracil permease family protein (AINAT3)                               | 66787643   | 87.1              | 54.6  | 41.8   | 67.5  |                                    |                  |                                          |
| 34              | AT2G12400.1       | AT2G12400.1                                                             | Plasma membrane fusion protein                                                 | 86230046   | 25.3              | 80.9  | 107.0  | 91.4  |                                    |                  |                                          |
| 35              | AT5G49980.1       | AT5G49980.1                                                             | Xanthine/uracil permease family protein (AINAT4)                               | 66145014   | 112.2             | 171.7 | 277.7  | 77.3  |                                    |                  |                                          |
| 36              | AT3G13560.1       | AT3G13560.1                                                             | D-Glycosyl hydrolases family 17 protein (beta1-3 glucanase, PUBG1)             | 65897722   | 4.27              | 148.4 | 287.3  | 52.3  |                                    |                  | 7                                        |
| 37              | AT1G64760.1       | AT1G64760.1;AT3G04010.1;AT5G18220.1                                     | D-Glycosyl hydrolases family 17 protein                                        | 64825238   | 12.3              | 63.2  | 48.9   | 38.1  |                                    |                  |                                          |
| 38              | AT5G58090.1       | AT5G58090.1                                                             | D-Glycosyl hydrolases family 17 protein                                        | 62858626   | 27.8              | 88.9  | 96.6   | 45.0  |                                    |                  |                                          |
| 39              | AT2G31810.1       | AT2G31810.1;AT2G31810.2;AT2G31810.3                                     | ACT domain-containing small subunit of acetylactolactate synthase protein      | 61594943   | 74.3              | 34.3  | 223.6  | 46.6  |                                    |                  |                                          |
| 40              | AT4G25240.1       | AT4G25240.1                                                             | SKUS similar 1                                                                 | 58338994   | 17.3              | 61.9  | 94.1   | 60.9  |                                    |                  |                                          |
| 41              | AT2G33650.1       | AT2G33650.1                                                             | Glucan synthase-like 8 (CALS10, GSL8)                                          | 53455867   | 0.8               | 20.8  | 26.4   | 23.8  |                                    |                  |                                          |
| 42              | AT4G43960.1       | AT4G43960.1;AT3G45600.2;AT5G60220.1                                     | Tetraspanin 9 (TET9)                                                           | 47769346   | 65.3              | 128.4 | 242.7  | 51.0  |                                    |                  |                                          |
| 43              | AT5G61030.1       | AT5G61030.1                                                             | Glycine-rich RNA-binding protein 3                                             | 45125284   | 185.8             | 40.8  | 211.6  | 189.0 |                                    |                  | 10                                       |
| 44              | AT1G69700.1       | AT1G69700.1                                                             | HVA22 homologue C                                                              | 43597164   | 222.7             | 137.1 | 204.2  | 86.5  |                                    |                  |                                          |
| 45              | AT2G17120.1       | AT2G17120.1                                                             | LyM domain-containing GPI-anchored protein 2 (LYM2)                            | 40630549   | 2.7               | 18.3  | 10.3   | 35.9  |                                    |                  | 8                                        |
| 46              | AT3G53780.2       | AT3G53780.2;AT3G53780.1;AT3G53780.3                                     | RHOMBoid-like protein 4                                                        | 40497867   | 103.2             | 104.2 | 195.7  | 57.7  |                                    |                  |                                          |
| 47              | AT1G04520.1       | AT1G04520.1                                                             | Plasmodesmata-callose-binding protein 2 (PDC2)                                 | 38475248   | 172.0             | 78.7  | 74.5   | 44.9  |                                    |                  | 5                                        |
| 48              | AT4G31140.1       | AT4G31140.1;AT5G20870.1                                                 | D-Glycosyl hydrolases family 17 protein                                        | 36993093   | 21.7              | 75.7  | 127.0  | 48.3  |                                    |                  |                                          |
| 49              | AT3G11850.1       | AT3G11850.1                                                             | NDRI/HHN1-like 2 (NHL2)                                                        | 34803344   | 308.4             | 86.8  | 306.7  | 50.7  |                                    |                  |                                          |
| 50              | AT1G04940.1       | AT1G04940.1;AT5G56380.1                                                 | HAD superfamily subfamily IIB acid phosphatase                                 | 33114051   | 62.9              | 119.8 | 264.1  | 378.2 |                                    |                  |                                          |
| 51              | AT5G61730.2       | AT5G61730.2;AT5G61690.1;AT5G61730.1                                     | ABC2 homolog 11                                                                | 32595047   | 107.3             | 38.3  | 51.4   | 83.3  |                                    |                  |                                          |
| 52              | AT1G05570.1       | AT1G05570.1;AT1G05570.2;AT1G05570.3                                     | Callose synthase 1 (CALS1, GSL6)                                               | 29840182   | 14.0              | 39.5  | 40.0   | 69.2  |                                    |                  |                                          |
| 53              | AT5G61740.1       | AT5G61740.1;AT3G47750.1;AT3G47750.2;AT3G47750.3                         | ABC2 homolog 14                                                                | 26706448   | 9.6               | 43.5  | 63.1   | 69.4  |                                    |                  |                                          |
| 54              | AT4G35060.1       | AT4G35060.1                                                             | Heavy metal transport/detoxification superfamily protein                       | 26431305   | 20.7              | 138.7 | 137.9  | 57.9  |                                    |                  |                                          |
| 55              | AT2G35960.1       | AT2G35960.1                                                             | NDRI/HHN1-like 12 (NHL12)                                                      | 25582331   | 198.4             | 46.8  | 186.0  | 66.5  |                                    |                  |                                          |
| 56              | AT5G17880.1       | AT5G17880.1                                                             | Multiple C2 domains and Transmembrane region Protein 16 (MCTP16)               | 23482273   | 59.7              | 33.5  | 126.7  | 34.9  |                                    | x                | x                                        |
| 57              | AT2G38010.1       | AT2G38010.1;AT1G07380.1;AT1G07380.2;AT2G38010.2;AT2G38010.3             | Neutral/alkaline non-lysosomal ceramidase                                      | 22529457   | 107.4             | 68.4  | 68.5   | 44.4  |                                    |                  |                                          |
| 58              | AT1G10160.1       | AT1G10160.1                                                             | Calcium-dependent phosphotriesterase superfamily protein                       | 21457368   | 133.0             | 61.0  | 237.8  | 75.2  |                                    |                  |                                          |
| 59              | AT5G03900.1       | AT5G03900.1;AT5G03900.2                                                 | Adenosine kinase 2                                                             | 21310606   | 185.4             | 34.8  | 149.8  | 88.8  |                                    |                  |                                          |
| 60              | AT5G23900.1       | AT5G23900.1;AT1G16101.1;AT1G16101.2;AT1G16101.3                         | Multiple C2 domains and Transmembrane region Protein 3,7 (MCTP3,7)             | 20441830   | 47.5              | 44.3  | 96.9   | 91.7  |                                    | x                | x                                        |
| 61              | AT2G01800.1       | AT2G01800.1                                                             | Late embryogenesis abundant (LEA) hydroxyproline-rich glycoprotein family      | 20127878   | 91.7              | 33.8  | 112.7  | 45.3  |                                    |                  |                                          |
| 62              | AT5G15400.1       | AT5G15400.1                                                             | U-box domain-containing protein                                                | 18414944   | 237.2             | 33.9  | 256.6  | 232.3 |                                    |                  |                                          |
| 63              | AT2G42010.1       | AT2G42010.1;AT2G42010.2;AT4G00240.1;AT4G00240.2;AT4G00240.3;AT4G18380.1 | Phospholipase D beta 1 (PLDBETA1)                                              | 18250506   | 189.7             | 46.1  | 149.7  | 35.4  |                                    |                  |                                          |
| 64              | AT1G23880.1       | AT1G23880.1;AT1G23880.2                                                 | NHL domain-containing protein                                                  | 16952398   | 189.3             | 52.5  | 134.8  | 107.1 |                                    |                  |                                          |
| 65              | AT1G08210.1       | AT1G08210.1;AT1G08210.2;AT1G08210.3;AT1G08210.4                         | Eukaryotic aspartyl protease family protein                                    | 15438618   | 182.9             | 132.8 | 172.9  | 50.4  |                                    |                  |                                          |
| 66              | AT1G07920.1       | AT1G07920.1                                                             | Multiple C2 domains and Transmembrane region Protein 15 (MCTP15, QUIRKY, QKI)  | 15188597   | 73.0              | 47.8  | 82.9   | 73.1  |                                    |                  | 11                                       |
| 67              | AT5G61130.1       | AT5G61130.1                                                             | PLC-like zeta protein superfamily protein                                      | 15255293   | 22.9              | 43.0  | 64.9   | 52.0  |                                    |                  |                                          |
| 68              | AT5G55050.1       | AT5G55050.1                                                             | GDSL-like Lipase/Acyl-protease superfamily protein                             | 14212548   | 87.9              | 56.2  | 236.3  | 83.1  |                                    |                  |                                          |
| 69              | AT1G64450.1       | AT1G64450.1                                                             | Glycine-rich protein family                                                    | 14151663   | 201.6             | 104.5 | 418.2  | 93.4  |                                    |                  |                                          |
| 70              | AT1G74320.1       | AT1G74320.1                                                             | HVA22 homologue A                                                              | 14058943   | 144.1             | 36.6  | 76.2   | 78.5  |                                    |                  |                                          |
| 71              | AT4G25550.1       | AT4G25550.1                                                             | Cleavage/polyadenylation specificity factor 25kDa subunit                      | 12069569   | 553.7             | 56.8  | 222.5  | 41.0  |                                    |                  |                                          |
| 72              | AT2G20850.1       | AT2G20850.1;AT2G20850.2                                                 | STRUBBELIG-receptor family 1 (SFR1)                                            | 11280786   | 8.0               | 60.7  | 63.0   | 60.8  |                                    |                  |                                          |
| 73              | AT5G12970.1       | AT5G12970.1                                                             | Multiple C2 domains and Transmembrane region Protein 5 (MCTP5)                 | 9974540    | 102.5             | 516.4 | 171.4  | 152.6 |                                    |                  |                                          |
| 74              | AT4G05520.1       | AT4G05520.1;AT4G05520.2                                                 | EPS15 homology domain 2                                                        | 9228287    | 24.2              | 63.0  | 91.8   | 57.6  |                                    |                  |                                          |
| 75              | AT1G04970.1       | AT1G04970.1                                                             | Glucan synthase-like 1 (CALS11, GSL1)                                          | 8134750    | 53.8              | 55.1  | 63.8   | 52.0  |                                    |                  |                                          |
| 76              | AT2G27810.1       | AT2G27810.1;AT2G27810.2;AT2G27810.3;AT2G27810.4                         | Nucleoside-ascorbate transporter 12 (ANAT12)                                   | 8121544    | 18.2              | 50.9  | 109.0  | 57.2  |                                    |                  |                                          |
| 77              | AT1G37590.1       | AT1G37590.1                                                             | Auxin efflux carrier family protein                                            | 7752624    | 12.8              | 160.1 | 59.8   | 156.8 |                                    |                  |                                          |
| 78              | AT2G31960.1       | AT2G31960.1;AT2G31960.2;AT2G31960.3                                     | Glucan synthase-like 3 (CALS2, GSL3)                                           | 7719612    | 24.4              | 81.2  | 57.1   | 88.2  |                                    |                  |                                          |
| 79              | AT2G27080.1       | AT2G27080.1                                                             | Late embryogenesis abundant (LEA) hydroxyproline-rich glycoprotein family      | 7372988    | 128.1             | 106.0 | 288.0  | 89.6  |                                    |                  |                                          |
| 80              | AT1G11310.1       | AT1G11310.1;AT1G11310.2                                                 | Leucine-rich repeat protein kinase family protein (SUB)                        | 6650692    | 31.8              | 40.7  | 68.3   | 55.7  |                                    |                  | 11                                       |
| 81              | AT3G17350.1       | AT3G17350.1;AT3G17350.2                                                 | Wall-associated receptor kinase carboxy-terminal protein                       | 6495607    | 48.3              | 38.0  | 86.7   | 75.5  |                                    |                  |                                          |
| 82              | AT4G27080.1       | AT4G27080.1;AT3G20560.1;AT4G27080.2                                     | PDH-like 5-4                                                                   | 6261964    | 227.2             |       |        |       |                                    |                  |                                          |

824 **Table S1. Proteins of the core *Arabidopsis* plasmodesmata proteome**

825 Label-free quantitation strategy was used to determine the relative abundance of proteins in  
826 the plasmodesmata (PD) fraction *versus* contaminant subcellular fractions namely, the PM,  
827 total extract (TP), microsomes ( $\mu$ ) and cell wall (CW), see Methods for details. Only proteins  
828 presenting minimum enrichment ratios of 8, 40, 30 and 30 in plasmodesmata *versus* PM, TP,  
829 microsomal and CW fractions, respectively were selected. Previously characterised  
830 plasmodesmal proteins are in orange and MCTP members in green. First row indicates the  
831 main accession and second row all possible isoforms potentially identified. The different  
832 shades (light to dark) of brown represent different enrichment levels (0-10; 10-20; 20-100 and  
833 above 100)

834

835

836  
837

|                       | CLONING | construction                | plasmid   | primers Forward/ right border                              | primers Reverse / left border                              |
|-----------------------|---------|-----------------------------|-----------|------------------------------------------------------------|------------------------------------------------------------|
| NbMCTP7               |         | p35S::GFP::NbMCTP7          | pGWB406   | GGGGACAAAGTTTGTACAAAAGAGGCTbaATGCTTAAGTAATCTGAAGCTAGGTGTGC | GGGGACCACTTTGTACAAAGAGCTGGGTTCACAACATACATCTGTTTGGAGCAGGAAG |
| AMCTP3                |         | PUBO10:eYFP::AMCTP3         | pK7m34GW  | GGGGACAAAGTTTGTACAAAAGAGGCTbaATGCTTAAGTAATCTGAAGCTAGGTGTGC | GGGGACCACTTTGTACAAAGAGCTGGGTTCACAACATACATCTGTTTGGAGCAGGAAG |
| AMCTP4                |         | PUBO10:eYFP::AMCTP4         | pRBar-OCS | CGTGGAGCAAGGATCCATGCTGGAGCAAGGAGGCGGAGGA                   | TAACATGTTGGATGCTGCTCCAGAGCATGCATCAGTTCTGTGCT               |
| AMCTP9                |         | P35S::eGFP::AMCTP6          | pB7m34GW  | GGGGACAAAGTTTGTACAAAAGAGGCTbaATGCTTAAGTAATCTGAAGCTAGGTGTGC | GGGGACCACTTTGTACAAAGAGCTGGGTTCACAACATACATCTGTTTGGAGCAGGAAG |
| MCTP_TMR              |         | PUBO10:eYFP::AMCTP9         | pB7m34GW  | GGGGACAAAGTTTGTACAAAAGAGGCTbaATGCTTAAGTAATCTGAAGCTAGGTGTGC | GGGGACCACTTTGTACAAAGAGCTGGGTTCACAACATACATCTGTTTGGAGCAGGAAG |
| NbMCTP7_TMR           |         | p35S::GFP::NbMCTP7 TMD      | pK7WYG2   | GGGGACAAAGTTTGTACAAAAGAGGCTbaATGCTTAAGTAATCTGAAGCTAGGTGTGC | GGGGACCACTTTGTACAAAGAGCTGGGTTCACAACATACATCTGTTTGGAGCAGGAAG |
| ATMCTP3_TMR           |         | PUBO10:eYFP::AMCTP1 TMD     | pB7m34GW  | GGGGACAAAGTTTGTACAAAAGAGGCTbaATGCTTAAGTAATCTGAAGCTAGGTGTGC | GGGGACCACTTTGTACAAAGAGCTGGGTTCACAACATACATCTGTTTGGAGCAGGAAG |
| ATMCTP4_TMR           |         | PUBO10:eYFP::AMCTP3 TMD     | pB7m34GW  | GGGGACAAAGTTTGTACAAAAGAGGCTbaATGCTTAAGTAATCTGAAGCTAGGTGTGC | GGGGACCACTTTGTACAAAGAGCTGGGTTCACAACATACATCTGTTTGGAGCAGGAAG |
| ATMCTP8_TMR           |         | PUBO10:eYFP::AMCTP4 TMD     | pK7m34GW  | GGGGACAAAGTTTGTACAAAAGAGGCTbaATGCTTAAGTAATCTGAAGCTAGGTGTGC | GGGGACCACTTTGTACAAAGAGCTGGGTTCACAACATACATCTGTTTGGAGCAGGAAG |
| ATMCTP9_TMR           |         | PUBO10:eYFP::AMCTP9 TMD     | pB7m34GW  | GGGGACAAAGTTTGTACAAAAGAGGCTbaATGCTTAAGTAATCTGAAGCTAGGTGTGC | GGGGACCACTTTGTACAAAGAGCTGGGTTCACAACATACATCTGTTTGGAGCAGGAAG |
| ATMCTP15_TMR          |         | PUBO10:eYFP::AMCTP15 TMD    | pB7m34GW  | GGGGACAAAGTTTGTACAAAAGAGGCTbaATGCTTAAGTAATCTGAAGCTAGGTGTGC | GGGGACCACTTTGTACAAAGAGCTGGGTTCACAACATACATCTGTTTGGAGCAGGAAG |
| MCTP_C2s              |         | PUBO10:AMCTP1 C2B-D::mVenus | pB7m34GW  | GGGGACAAAGTTTGTACAAAAGAGGCTbaATGCTTAAGTAATCTGAAGCTAGGTGTGC | GGGGACCACTTTGTACAAAGAGCTGGGTTCACAACATACATCTGTTTGGAGCAGGAAG |
| ATMCTP1_C2s           |         | PUBO10:AMCTP3 C2B-D::mVenus | pB7m34GW  | GGGGACAAAGTTTGTACAAAAGAGGCTbaATGCTTAAGTAATCTGAAGCTAGGTGTGC | GGGGACCACTTTGTACAAAGAGCTGGGTTCACAACATACATCTGTTTGGAGCAGGAAG |
| ATMCTP3_C2s           |         | PUBO10:AMCTP4 C2B-D::mVenus | pB7m34GW  | GGGGACAAAGTTTGTACAAAAGAGGCTbaATGCTTAAGTAATCTGAAGCTAGGTGTGC | GGGGACCACTTTGTACAAAGAGCTGGGTTCACAACATACATCTGTTTGGAGCAGGAAG |
| ATMCTP8_C2s           |         | PUBO10:AB C2::mVenus        | pB7m34GW  | GGGGACAAAGTTTGTACAAAAGAGGCTbaATGCTTAAGTAATCTGAAGCTAGGTGTGC | GGGGACCACTTTGTACAAAGAGCTGGGTTCACAACATACATCTGTTTGGAGCAGGAAG |
| ATMCTP15_C2s          |         | P35S::AT15 C2A-D::eGFP      | pK7WYG2   | GGGGACAAAGTTTGTACAAAAGAGGCTbaATGCTTAAGTAATCTGAAGCTAGGTGTGC | GGGGACCACTTTGTACAAAGAGCTGGGTTCACAACATACATCTGTTTGGAGCAGGAAG |
| NbMCTP7_C2s           |         | P35S::NbMCTP7 C2A-D::eYFP   | pHYWYG2   | GGGGACAAAGTTTGTACAAAAGAGGCTbaATGCTTAAGTAATCTGAAGCTAGGTGTGC | GGGGACCACTTTGTACAAAGAGCTGGGTTCACAACATACATCTGTTTGGAGCAGGAAG |
| GENOTYPING            |         |                             |           |                                                            |                                                            |
| AMCTP3                |         |                             |           | TCAGTCTTATCCCTGGCT                                         | GGGGACCACTTTGTACAAAGAGCTGGGTTCACAACATACATCTGTTTGGAGCAGGAAG |
| AMCTP4                |         |                             |           | CTTGGCTTCAITGGCAAC                                         | GGGGACCACTTTGTACAAAGAGCTGGGTTCACAACATACATCTGTTTGGAGCAGGAAG |
| Transcript expression |         |                             |           | GGGGACCACTTTGTACAAAGAGCTGGGTTCACAACATACATCTGTTTGGAGCAGGAAG | GGGGACCACTTTGTACAAAGAGCTGGGTTCACAACATACATCTGTTTGGAGCAGGAAG |
| AMCTP3                |         |                             |           | GGGGACCACTTTGTACAAAGAGCTGGGTTCACAACATACATCTGTTTGGAGCAGGAAG | GGGGACCACTTTGTACAAAGAGCTGGGTTCACAACATACATCTGTTTGGAGCAGGAAG |
| AMCTP4                |         |                             |           | GGGGACCACTTTGTACAAAGAGCTGGGTTCACAACATACATCTGTTTGGAGCAGGAAG | GGGGACCACTTTGTACAAAGAGCTGGGTTCACAACATACATCTGTTTGGAGCAGGAAG |
| ACT2 (AT1G48240)      |         |                             |           | GGGGACCACTTTGTACAAAGAGCTGGGTTCACAACATACATCTGTTTGGAGCAGGAAG | GGGGACCACTTTGTACAAAGAGCTGGGTTCACAACATACATCTGTTTGGAGCAGGAAG |

Table S2. Primers used for MCTP cloning

838 **Movie S1.**

839 Confocal time lapse imaging of 35S:GFP-NbMCTP7 in *N. benthamiana* epidermal leaves.  
840 One image every 0.2 seconds.

841

842 **Movie S2.**

843 Confocal time lapse imaging of AtMCTP4:GFP-AtMCTP4 in transgenic *Arabidopsis*  
844 epidermal leaves. One image every 0.2 seconds.

845

846 **Movie S3.**

847 Docking of the C2B, C2C and C2D domains of AtMCTP4 on a "PM-like" membrane (see  
848 Fig. 5), containing phosphatidylcholine (PC), phosphatidylserine (PS), sitosterol (Sito) and  
849 phosphoinositol-4-phosphate (PI4P) in the following ratio: PC/PS/Sito/PI4P 57:19:20:4.  
850 Please note that 0.5 $\mu$ s out of total (2.5 $\mu$ s) simulation is shown (moment of docking). The  
851 amino acid colour code is as follow: red, negatively charged (acidic) residues; blue, positively  
852 charged (basic) residues; green, polar uncharged residues; and white, hydrophobic residues.  
853 The lipid colour code is as follow: PC is depicted as light-pink polar heads and grey acyl  
854 chains, PS is depicted as dark-pink polar heads and light-purple acyl chains, PI4P is depicted  
855 as orange (inositol ring) and yellow (phosphate 4) polar heads and light-blue acyl chains and  
856 sitosterol is light-green.

857 **MATERIAL & METHODS**

858

859 **Biological material and growth conditions**

860 *Arabidopsis (Columbia)* and transgenic lines were grown vertically on solid medium  
861 composed of *Murashige and Skoog* (MS) medium including vitamins (2.15g/L), MES  
862 (0.5g/L) and plant-Agar (7g/L), pH 5.7, then transferred to soil under long-day conditions at  
863 22 °C and 70% humidity.

864 *Arabidopsis (Landsberg erecta)* culture cells were cultivated as described in(Nicolas *et al*,  
865 2017a) under constant light (20 $\mu$ E/m/s) at 22°C. Cells were used for experimentation at  
866 various ages ranging from four to seven-day-old (mentioned in individual experiment).

867

868 **MCTP sequence alignment and phylogenetic tree**

869 The 16 members of *Arabidopsis thaliana* MCTP family, gathering a total of 59 C2 domains,  
870 were dissected using a combination of several bioinformatic tools. The alignment of *A.*  
871 *thaliana* MCTP members from(Liu *et al*, 2017) combined with Pfam predictions was used as

872 a first step to segregate the MCTP members into “sub-families”: the short MCTPs, which  
873 contain three C2 domains (C2B to C2D) and the long MCTPs, which contain four C2  
874 domains (C2A to C2D). The short MCTPs lack the C2A domain, whereas the C2B-C-D are  
875 conserved in all members.

876 The prediction and delimitation of C2 domains in proteins, including MCTPs, from databases  
877 such as Pfam are rather imprecise. In order to provide stronger and more accurate predictions  
878 for the delimitation of each C2 domain, we used both the PSIPRED(Buchan *et al*, 2013; Jones,  
879 1999) protein sequence analysis (<http://bioinf.cs.ucl.ac.uk/psipred/>) and Hydrophobic Cluster  
880 Analysis(Callebaut *et al*, 1997) (HCA; <http://www-ext.impmc.upmc.fr/~callebau/HCA.html>).  
881 Multiple sequence alignment was performed using Clustal Omega  
882 (<http://www.ebi.ac.uk/Tools/msa/clustalo/>).

883

#### 884 **Cluster map of Human and *A. thaliana* C2 domains**

885 To generate a C2 cluster map, we first collected all *A. thaliana* and human C2 domains, using  
886 the HHpred webserver(Alva *et al*, 2016; Söding *et al*, 2005). The obtained set was filtered to  
887 a maximum of 100% pairwise sequence identity at a length coverage of 70% using  
888 MMseqs2(Steinegger & Söding, 2017) to eliminate all redundant sequences. The sequences in  
889 the filtered set, comprising almost all human and *A. thaliana* C2 domains (~1800 in total),  
890 was next clustered in CLANS(Frickey & Lupas, 2018) based on their all-against-all pairwise  
891 sequence similarities as evaluated by BLAST P-values .

892

893

#### 894 **Cloning of MCTPs and transformation into *Arabidopsis***

895 The different constructs used in this study were either PCR amplified from cDNA or genomic  
896 DNA (Col-0) using gene specific primers (Supplementary Table S2), or were synthesised and  
897 cloned into donor vectors by GenScript® (Supplementary Table S2). For N-terminal tag  
898 fusion, the PCR/DNA products were cloned into the Multisite Gateway® donor vectors  
899 pDONR-P2RP3 (Invitrogen, Carlsbad, CA), and then subcloned into pB7m34GW or  
900 pK7m34GW using the multisite LR recombination system(Karimi *et al*, 2002), the moderate  
901 promoter UBIQUITIN10 (UBQ10/pDONR-P4P1R previously described in(Marquès-Bueno  
902 *et al*, 2016)) and eYFP/pDONR221. For C-terminal tag fusion, the PCR/DNA products were  
903 first cloned into pDONR221, then multisite recombined using a mVenus/pDONR-P2RP3 and  
904 UBQ10/pDONR-P4P1R.

905 For the expression of GFP-MCTP4 driven by its native promoter we used the binary vector  
906 pRBbar-OCS harboring a BASTA resistance, a multiple cloning site (MCS) and an octopine  
907 synthase (OCS) terminator within the left and right borders. The vector derived from the  
908 pB2GW7 (Karimi *et al*, 2002) by cutting out the expression cassette with the restriction  
909 enzymes SacI and HindIII and replaced it with a synthesized MCS and an OCS terminator  
910 fragment. To combine promoter region and GFP-MCTP4 coding sequence we used In-Fusion  
911 cloning (Takara Bio Europe). To PCR amplify the coding sequence for GFP-MCTP4 with its  
912 respective primers (Supplementary Table2) we used the plasmid coding for GFP-MCTP4 as  
913 template (previously described as GFP-C2-89 by (Kraner *et al*, 2017)). The resulting pRBbar-  
914 pMCTP4: plasmid was linearized with BamHI/PstI the amplified GFP-MCTP4 was fused in  
915 to generate the MCTP4 promoter driven GFP-MCTP4 construct (pMCTP4:GFP-MCTP4).

916 Expression vectors were transformed in *Arabidopsis* Col-0 by floral dip(Clough & Bent,  
917 1998), and transformed seeds were selected based on plasmid resistance.

918 *N. benthamiana* homologs of Arabidopsis MCTP isoforms were identified by protein BLAST  
919 searches against the SolGenomics *N. benthamiana* genome (<https://solgenomics.net>). An  
920 ortholog of AtMCTP7, NbMCTP7 (Niben101Scf03374g08020.1) was amplified from *N.*  
921 *benthamiana* leaf cDNA. The recovered cDNA of NbMCTP7 differed from the SolGenomics  
922 reference by the point mutation G287D and three additional silent nucleotide exchanges, as  
923 well as missing base pairs 1678-1716 which correspond to thirteen in-frame codons (encoding  
924 the amino acid sequence LKKEKFSSRLHLR). We note that this nucleotide and amino acid  
925 sequence is exactly repeated directly upstream (bp 1639-1677) in the SolGenomics reference  
926 and may thus represent an error in the *N. benthamiana* genome assembly. The recovered  
927 NbMCTP7 sequence has been submitted to database.

928

### 929 **Generation of *Atmctp3/Atmctp4* loss-of-function Arabidopsis mutant**

930 *Atmctp3* (Sail\_755\_G08) and *Atmctp4* (Salk\_089046) T-DNA insertional Arabidopsis  
931 mutants (background Col-0) were obtained from the Arabidopsis Biological Resource Center  
932 (<http://www.arabidopsis.org/>). Single T-DNA insertion lines were genotyped and  
933 homozygous lines were crossed to obtain double homozygous *Atmctp3/Atmctp4*.

934 For genotyping, genomic DNA was extracted from Col-0, *Atmctp3* (GABI-285E05) and  
935 *Atmctp4* (SALK-089046) plants using chloroform:isoamyl alcohol (ratio24:1), genomic DNA  
936 isolation buffer (200mM Tris HCL PH7.5, 250mM NaCl, 25mM EDTA and 0.5% SDS) and  
937 isopropanol. PCR were performed with primers indicated in Supplementary Table2. For  
938 transcript expression, total mRNA was extracted from Col-0 and *Atmctp3/Atmctp4* using

939 RNeasy® Plant Mini Kit (QIAGEN) and cDNA was produced using random and oligodT  
940 primers. The expression level of AtMCTP3, AtMCTP4 and ubiquitous Actin2 (ACT2)  
941 transcript was tested by PCR amplification using primers listed in Supplementary Table2.

942

943

#### 944 **Confocal Laser Scanning Microscopy**

945 For transient expression in *N. benthamiana*, leaves of 3 week-old plants were pressure-  
946 infiltrated with GV3101 agrobacterium strains, previously electroporated with the relevant  
947 binary plasmids. Prior to infiltration, agrobacteria cultures were grown in Luria and Bertani  
948 medium with appropriate antibiotics at 28°C for two days then diluted to 1/10 and grown until  
949 the culture reached an OD<sub>600</sub> of about 0.8. Bacteria were then pelleted and resuspended in  
950 water at a final OD<sub>600</sub> of 0.3 for individual constructs, 0.2 each for the combination of two.  
951 The ectopic silencing suppressor 19k was co-infiltrated at an OD<sub>600</sub> of 0.15. Agroinfiltrated *N.*  
952 *benthamiana* leaves were imaged 3-4 days post infiltration at room temperature. ~ 2 by 2 cm  
953 leaf pieces were removed from plants and mounted with the lower epidermis facing up onto  
954 glass microscope slides.

955 Transgenic *Arabidopsis* plants were grown as described above. For primary roots, lateral roots  
956 and hypocotyl imaging, six to seven days old seedlings or leaves of 5-8 leaf stage rosette  
957 plants were mounted onto microscope slides. For shoot apical meristem imaging, the plants  
958 were first dissected under a binocular then transferred to solid MS media and immediately  
959 observed using a water-immersion long-distance working 40X water immersion objective.

960 Confocal imaging was performed on a Zeiss LSM 880 confocal laser scanning microscope  
961 equipped with fast AiryScan using Zeiss C PL APO x63 oil-immersion objective (numerical  
962 aperture 1.4). For GFP, YFP and mVenus imaging, excitation was performed with 2-8% of  
963 488 nm laser power and fluorescence emission collected at 505-550 nm and 520-580 nm,  
964 respectively. For RFP and mCherry imaging, excitation was achieved with 2-5% of 561 nm  
965 laser power and fluorescence emission collected at 580-630 nm. For aniline blue (infiltrated at  
966 the concentration of 25 µg/mL) and Calcofluor White (1 µg /mL), excitation was achieved  
967 with 5% of 405 nm laser and fluorescence emission collected at 440-480 nm. For co-  
968 localisation sequential scanning was systematically used.

969 For quantification of NbMCTP7 co-localisation with VAP27.1, SYT1 and PDCB1, co-  
970 expression of the different constructs was done in *N. benthamiana*. An object based method  
971 was used for colocalization quantification(Bolte & Cordelières, 2006) . Images from different  
972 conditions are all acquired with same parameters (zoom, gain, laser intensity etc.) and



973 channels are acquired sequentially. These images are processed and filtered using ImageJ  
974 software (<https://imagej.nih.gov/ij/>) in order to bring out the foci of the pictures. These foci  
975 were then automatically segmented by thresholding and the segmented points from the two  
976 channels were assessed for colocalization using the ImageJ plugin *Just Another*  
977 *Colocalization Plugin (JACoP)*(Bolte & Cordelières, 2006). This whole process was  
978 automatized using a macro (available upon demand).  
979 Pseudo-Schiff-Propidium iodide stained *Arabidopsis* root tips was performed according  
980 to(Truernit *et al*, 2008). Aniline blue staining was performed according to(Grison *et al*, 2015).  
981 Brightness and contrast were adjusted on ImageJ software (<https://imagej.nih.gov/ij/>).

982

### 983 **Plasmodesmata (PD) index**

984 Plasmodesmata depletion or enrichment was assessed by calculating the fluorescence  
985 intensity of GFP/YFP-tagged full-length MCTP, truncated MCTPs and the proton pump  
986 ATPase GFP-PMA2(Gronnier *et al*, 2017), at 1) plasmodesmata (indicated by mCHERRY-  
987 PDCB1, PDLP1-mRFP or aniline blue) and 2) at the cell periphery (i.e. outside  
988 plasmodesmata pitfields). For that, confocal images of leaf epidermal cells (*N. benthamiana*  
989 or *Arabidopsis*) were acquired by sequential scanning of mCHERRY-PDCB, PDLP1-mRFP  
990 or aniline blue (plasmodesmata markers) in channel 1 and GFP/YFP-tagged MCTPs in  
991 channel 2 (for confocal setting see above). About thirty images of leaf epidermis cells were  
992 acquired with a minimum of three biological replicates. Individual images were then  
993 processed using ImageJ by defining five regions of interest (ROI) at plasmodesmata (using  
994 plasmodesmata marker to define the ROI in channel1) and five ROIs outside plasmodesmata.  
995 The ROI size and imaging condition were kept the same. The GFP/YFP-tagged MCTP mean  
996 intensity (channel 2) was measured for each ROI then averaged for single image. The  
997 plasmodesmata index corresponds to intensity ratio between fluorescence intensity of MCTPs  
998 at plasmodesmata versus outside the pores. For the plasmodesmata-index of RFP-HDEL,  
999 PDLP1-RFP and mCHERRY-PDCB1 we used aniline to indicate pitfields. R software was  
1000 used for making the box plots and statistics.

1001

### 1002 **FRAP analysis**

1003 For FRAP analysis, GFP-NbMCTP7, RFP-HDEL and mCHERRY-PDCB1-expressing *N.*  
1004 *benthamiana* leaves were used. The experiments were performed on a Zeiss LSM 880  
1005 confocal microscope equipped with a Zeiss C PL APO x63 oil-immersion objective  
1006 (numerical aperture 1.4). GFP and mCherry were respectively excited at 488nm and 561nm

1007 with 2% of Argon or DPSS 561-10 laser power, and fluorescence was collected with the  
1008 GaAsp detector at 492-569nm and 579-651nm, respectively. To reduce as much as possible  
1009 scanning time during FRAP monitoring, the acquisition window was cropped to a large  
1010 rectangle of 350 by 50 pixels, with a zoom of 2.7 and pixel size of 0.14 $\mu$ m. By this mean,  
1011 pixel dwell time was of 0.99 $\mu$ s and total frame scan time could be reduced down to 20 ms  
1012 approximately. Photobleaching was performed on rectangle ROIs for the ER-network and on  
1013 circle ROIs for the pitfields with the exciting laser wavelengths set to 100%. The FRAP  
1014 procedure was the following: 30 pre-bleach images, 10 iterations of bleaching with a pixel  
1015 dwell time set at 1.51 $\mu$ s and then 300 images post-bleach with the “safe bleach mode for  
1016 GaAsp”, bringing up the scan time up to approximately 200ms. The recovery profiles were  
1017 background subtracted and then double normalized (according to the last prebleach image  
1018 and to the reference signal, in order to account for observational photobleaching) and set to  
1019 full scale (last pre-bleach set to 1 and first post-bleach image set to 0), as described by Kote  
1020 Miura in his online FRAP-teaching module (EAMNET-FRAP module, <https://embl.de>).  
1021 Plotting and curve fitting was performed on GraphPad Prism (GraphPad Software, Inc.).

1022

### 1023 **3D-SIM imaging**

1024 For 3D structured illumination microscopy (3D-SIM), an epidermal peel was removed from a  
1025 GFP-NbMCTP7-expressing leaf and mounted in Perfluorocarbon PP11 (Littlejohn *et al*, 2014)  
1026 under a high precision (170mm $\pm$ 5mm) coverslip (Marie Enfield). The sample chamber was  
1027 sealed with non-toxic Exaktosil N 21 (Bredent, Germany). 3D-SIM images were obtained  
1028 using a GE Healthcare / Applied Precision OMX v4 BLAZE with a 1.42NA Olympus  
1029 PlanApo N 60X oil immersion objective. GFP was excited with a 488nm laser and imaged  
1030 with emission filter 504-552nm (528/48nm). SR images were captured using Deltavision  
1031 OMX software 3.70.9220.0. SR reconstruction, channel alignment and volume rendering  
1032 were done using softWoRx V. 7.0.0.

### 1033 **Yeast**

1034 Wild-type (SEY6210) and delta-tether yeast strain (Manford *et al*, 2012) were transformed  
1035 with Sec63.mRFP (pSM1959). Sec63.mRFP (Metzger *et al*, 2008) was used as an ER marker  
1036 and was a gift from Susan Mickaelis (Addgene plasmid #41837). Delta-tether/Sec63.mRFP  
1037 strain was transformed with AtMCTP4 (pCU416 : pCU between SacI and SpeI sites, Cyc1  
1038 terminator between XhoI and KpnI sites and AtMCTP4 CDS between BamHI and SmaI sites,  
1039 Supplementary table S2). Calcofluor White was used to stain the cell wall of yeast. All  
1040 fluorescent microscopy was performed on midlog cells, grown on selective yeast media (-

1041 URA -LEU for AtMCTP4 and Sec63 expression, and -LEU for Sec63). Images were acquired  
1042 with Airyscan module, using a 63X oil immersion lens and sequential acquisition. Brightness  
1043 and contrast were adjusted on ImageJ software (<https://imagej.nih.gov/ij/>).

1044

#### 1045 **Supplementary methods**

1046 Methods for plasmodesmata label-free proteomic analysis and dynamic modelling are  
1047 described in details in Supplementary method1.

1048 Sequence data for genes in this article can be found in the GenBank/EMBL databases using  
1049 the following accession numbers: AtMCTP1, At5g06850; AtMCTP2, At5g48060; AtMCTP3,  
1050 At3g57880; AtMCTP4, At1g51570; AtMCTP5, At5g12970; AtMCTP6, At1g22610;  
1051 AtMCTP7, At4g11610; AtMCTP8, At3g61300; AtMCTP9, At4g00700; AtMCTP10,  
1052 At1g04150; AtMCTP11, At4g20080; AtMCTP12, At3g61720; AtMCTP13, At5g03435;  
1053 AtMCTP14, At3g03680; AtMCTP15, At1g74720; AtMCTP16, At5g17980 and NbMCTP7,  
1054 Niben101Scf03374g08020.1.

1055

#### 1056 **Acknowledgements**

1057 This work was supported by the National Agency for Research (Grant ANR-14-CE19-0006-  
1058 01 to E.M.B), the European Research Council (ERC) under the European Union's Horizon  
1059 2020 research and innovation programme (grant agreement No 772103-BRIDGING to  
1060 E.M.B), Fonds National de la Recherche Scientifique (NEAMEMB PDR T.1003.14,  
1061 BRIDGING CDR J.0114.18 and RHAMEMB CDR J.0086.18 to L. L. and M.D.). J.D.P. is  
1062 funded by a PhD fellowship from the Belgian "Formation à la Recherche dans l'Industrie et  
1063 l'Agriculture" (FRIA). Work in J.T, lab is supported by grant BB/M007200/1 from the U.K.  
1064 Biotechnology and Biomedical Sciences Research Council (BBSRC).

1065 Fluorescence microscopy analyses were performed at the plant pole of the Bordeaux Imaging  
1066 Centre (<http://www.bic.u-bordeaux.fr>). The proteomic analyses were performed at the  
1067 Functional Genomic Center of Bordeaux, (<https://proteome.cgfb.u-bordeaux.fr>). We thank  
1068 Steffen Vanneste and Abel Rosado for providing the VAP27.1.RFP and SYT1.GFP binary  
1069 vectors and Yvon Jaillais for providing the 1xPH(FAPP1) *Arabidopsis* transgenic lines. The  
1070 plasmid pRBbar-OCS was kindly provided by Prof. Frederik Börnke (IGZ—Leibniz Institute  
1071 of Vegetable and Ornamental Crops, Großbeeren, Germany). We thank Christophe Trehin  
1072 and Patrice Morel for providing the AtMCT15\_C2s construct and Alenka Copic for providing  
1073 the yeast WT and  $\Delta$ -tether strains. We thank Fabrice Cordelières for his help for the

1074 fluorescence image quantification and Paul Gouget, Yvon Jaillais, Andrea Paterlini, and Yrjo  
1075 Helariutta for critical review of the article prior to submission.

1076

1077 **Contributions**

1078 F.I., M.S.G., M.F. and S.C. carried out the proteomic analysis. M.L.B. cloned the MCTPs,  
1079 produced and phenotyped the *Arabidopsis* transgenic lines, with the exception of  
1080 AtMCTP4:GFP-MCTP4 and 35S:GFP-MCTP6 which were generated by M.K.. M.L.B. and  
1081 J.D.P. imaged the MCTP reporter lines. W.N. carried out the FRAP analysis and image  
1082 quantification for co-localisation with the help of L.B.. A.G. performed the phylogenic  
1083 analysis. J.D.P. carried out the PAO experiments. M.L.B. performed the yeast experiments.  
1084 T.J.H. and J.T. performed the 3D-SIM. V.A. carried out the C2 cluster map analysis. J.D.P.  
1085 carried out the molecular dynamic analysis with the help of J-M.C. and L.L..

1086 E.M.B. conceived the study and designed experiments with the help of J.T and L.L. E.M.B,  
1087 J.D.P., J.T. and M.L.B. wrote the manuscript. All the authors discussed the results and  
1088 commented on the manuscript.

1089

1090 **Competing interests**

1091 The authors declare no competing financial interests.

1092

1093 **BIBLIOGRAPHY**

1094

1095 Abdullah N, Padmanarayana M, Marty NJ & Johnson CP (2014) Quantitation of the calcium  
1096 and membrane binding properties of the C2 domains of dysferlin. *Biophys. J.* **106**: 382–  
1097 389

1098 Alva V, Nam S, Johannes S & Lupas AN (2016) The MPI bioinformatics Toolkit as an  
1099 integrative platform for advanced protein sequence and structure. *Nucleic Acids Res.* **44**:  
1100 410–415

1101 Bayer EM, Mongrand S & Tilsner J (2014) Specialized membrane domains of  
1102 plasmodesmata, plant intercellular nanopores. *Front. Plant Sci.* **5**: 507

1103 Bayer EM, Sparkes I, Vanneste S & Rosado A (2017) From shaping organelles to signalling  
1104 platforms : the emerging functions of plant ER–PM contact sites. *Curr. Opin. Plant Biol.*  
1105 **40**: 89–96

1106 Benitez-Alfonso Y, Faulkner C, Pendle A, Miyashima S, Helariutta Y & Maule A (2013)  
1107 Symplastic intercellular connectivity regulates lateral root patterning. *Dev. Cell* **26**: 136–  
1108 147

1109 Bian X, Saheki Y & De Camilli P (2018) Ca<sup>2+</sup> releases E-Syt1 autoinhibition to couple ER-  
1110 plasma membrane tethering with lipid transport. *EMBO J.* **37**: 219–234

1111 Bolte S & Cordelières FP (2006) A guided tour into subcellular colocalization analysis in  
1112 light microscopy. *J. Microsc.* **224**: 213–232

1113 Buchan DWA, Minneci F, Nugent TCO, Bryson K & Jones DT (2013) Scalable web services  
1114 for the PSIPRED protein analysis workbench. *Nucleic Acids Res.* **41**: W349-357

1115 Burgoyne T, Patel S & Eden ER (2015) Calcium signaling at ER membrane contact sites.  
1116 *Biochim. Biophys. Acta - Mol. Cell Res.* **1853**: 2012–2017

1117 Caillaud M-C, Wirthmueller L, Sklenar J, Findlay K, Piquerez SJM, Jones AME, Robatzek S,  
1118 Jones JDG & Faulkner C (2014) The Plasmodesmal Protein PDLP1 Localises to  
1119 Haustoria-Associated Membranes during Downy Mildew Infection and Regulates  
1120 Callose Deposition. *PLoS Pathog.* **10**: e1004496

1121 Callebaut I, Labesse G, Durand P, Poupon A, Canard L, Chomilier J, Henrissat B & Mormon  
1122 JP (1997) Deciphering protein sequence information through hydrophobic cluster  
1123 analysis ( HCA ): current status and perspectives. *C. Cell. mol. life sci.* **53**: 621–645

1124 Carlsbecker A, Lee J-Y, Roberts CJ, Dettmer J, Lehesranta S, Zhou J, Lindgren O, Moreno-  
1125 Risueno M a, Vatén A, Thitamadee S, Campilho A, Sebastian J, Bowman JL, Helariutta  
1126 Y & Benfey PN (2010) Cell signalling by microRNA165/6 directs gene dose-dependent

- 1127 root cell fate. *Nature* **465**: 316–321
- 1128 Chang CL, Hsieh TS, Yang TT, Rothberg KG, Azizoglu DB, Volk E, Liao JC & Liou J  
1129 (2013) Feedback regulation of receptor-induced Ca<sup>2+</sup> signaling mediated by E-Syt1 and  
1130 Nir2 at endoplasmic reticulum-plasma membrane junctions. *Cell Rep.* **5**: 813–825
- 1131 Clough SJ & Bent AF (1998) Floral dip: a simplified method for *Agrobacterium*-mediated  
1132 transformation of *Arabidopsis thaliana*. *Plant J.* **16**: 735–743
- 1133 Corbalan-Garcia S & Gómez-Fernández JC (2014) Signaling through C2 domains: More than  
1134 one lipid target. *Biochim. Biophys. Acta - Biomembr.* **1838**: 1536–1547
- 1135 Daum G, Medzihradzsky A, Suzaki T & Lohmann JU (2014) A mechanistic framework for  
1136 non-cell autonomous stem cell induction in *Arabidopsis*. *Proc. Natl. Acad. Sci. U. S. A.*  
1137 **111**: 14619–24
- 1138 Ding B, Turgeon R & Parthasarathy M V (1992) Substructure of freeze-substituted  
1139 plasmodesmata. *Protoplasma* **169**: 28–41
- 1140 Dunkley TPJ, Hester S, Shadforth IP, Runions J, Weimar T, Hanton SL, Griffin JL, Bessant  
1141 C, Brandizzi F, Hawes C, Watson RB, Dupree P & Lilley KS (2006) Mapping the  
1142 *Arabidopsis* organelle proteome. *PNAS* **103**: 6518–6523
- 1143 Eden ER, Sanchez-Heras E, Tsapara A, Sobota A, Levine TP & Futter CE (2016) Annexin  
1144 A1 tethers membrane contact sites that mediate ER to endosome cholesterol transport.  
1145 *Dev. Cell* **37**: 473–483
- 1146 Eden ER, White IJ, Tsapara A & Futter CE (2010) Membrane contacts between endosomes  
1147 and ER provide sites for PTP1B-epidermal growth factor receptor interaction. *Nat. Cell*  
1148 *Biol.* **12**: 267–72
- 1149 Eisenberg-Bord M, Shai N, Schuldiner M & Bohnert M (2016) A tether is a tether is a tether:  
1150 tethering at membrane contact sites. *Dev. Cell* **39**: 395–409
- 1151 Faulkner C & Bayer EMF (2017) Isolation of plasmodesmata. *Methods Mol. Biol.* **1511**: 187–  
1152 198
- 1153 Faulkner C, Petutschnig E, Benitez-Alfonso Y, Beck M, Robatzek S, Lipka V & Maule AJ  
1154 (2013) LYM2-dependent chitin perception limits molecular flux via plasmodesmata.  
1155 *Proc. Natl. Acad. Sci. U. S. A.* **110**: 9166–70
- 1156 Fernández-Busnadiego R, Saheki Y & De Camilli P (2015) Three-dimensional architecture of  
1157 extended synaptotagmin-mediated endoplasmic reticulum–plasma membrane contact  
1158 sites. *Proc. Natl. Acad. Sci.* **112**: E2004-13
- 1159 Fernandez-Calvino L, Faulkner C, Walshaw J, Saalbach G, Bayer E, Benitez-Alfonso Y &  
1160 Maule A (2011) *Arabidopsis* plasmodesmal proteome. *PLoS One* **6**: e18880

- 1161 Fitzgibbon J, Bell K, King E & Oparka K (2010) Super-Resolution Imaging of  
1162 Plasmodesmata Using Three-Dimensional Structured Illumination Microscopy. **153:**  
1163 1453–1463
- 1164 Frickey T & Lupas A (2018) CLANS : a Java application for visualizing protein families  
1165 based on pairwise similarity. *Bioinformatics* **20**: 3702–3704
- 1166 Fulton L, Batoux M, Vaddepalli P, Yadav RK, Busch W, Andersen SU, Jeong S, Lohmann  
1167 JU & Schneitz K (2009) DETORQUEO, QUIRKY, and ZERZAUST represent novel  
1168 components involved in organ development mediated by the receptor-like kinase  
1169 STRUBBELIG in *Arabidopsis thaliana*. *PLoS Genet.* **5**:
- 1170 Gallagher KL, Sozzani R & Lee C-M (2014) Intercellular protein movement: deciphering the  
1171 language of development. *Annu. Rev. Cell Dev. Biol.* **30**: 207–233
- 1172 Gallo A, Vannier C & Galli T (2016) ER-PM associations: structures and functions. *Annu.*  
1173 *Rev. Cell Dev. Biol.* **32**: 279–301
- 1174 Giordano F, Saheki Y, Idevall-Hagren O, Colombo SF, Pirruccello M, Milosevic I, Gracheva  
1175 EO, Bagriantsev SN, Borgese N & De Camilli P (2013) PI(4,5)P<sub>2</sub>-Dependent and Ca<sup>2+</sup>-  
1176 regulated ER-PM interactions mediated by the extended synaptotagmins. *Cell* **153**:  
1177 1494–1509
- 1178 Grison MS, Brocard L, Fouillen L, Nicolas W, Wewer V, Dörmann P, Nacir H, Benitez-  
1179 Alfonso Y, Claverol S, Germain V, Boutté Y, Mongrand S & Bayer EM (2015) Specific  
1180 membrane lipid composition is important for plasmodesmata function in *Arabidopsis*.  
1181 *Plant Cell* **27**: 1228–1250
- 1182 Gronnier J, Crowet J-M, Habenstein B, Nasir MN, Bayle V, Hosy E, Platre MP, Gouguet P,  
1183 Raffaele S, Martinez D, Grelard A, Loquet A, Simon-Plas F, Gerbeau-Pissot P, Der C,  
1184 Bayer EM, Jaillais Y, Deleu M, Germain V, Lins L, et al (2017) Structural basis for plant  
1185 plasma membrane protein dynamics and organization into functional nanodomains. *Elife*  
1186 **6**:
- 1187 Han X, Hyun T, Zhang M, Kumar R, Koh EJ, Kang BH, Lucas W & Kim JY (2014) Auxin-  
1188 callose-mediated plasmodesmal gating is essential for tropic auxin gradient formation  
1189 and signaling. *Dev. Cell* **28**: 132–146
- 1190 Henne WM, Liou J & Emr SD (2015) Molecular mechanisms of inter-organelle ER–PM  
1191 contact sites. *Curr. Opin. Cell Biol.* **35**: 123–130
- 1192 Ho C-MK, Paciorek T, Abrash E & Bergmann DC (2016) Modulators of stomatal lineage  
1193 signal transduction alter membrane contact sites and reveal specialization among  
1194 ERECTA Kinases. *Dev. Cell* **38**: 345–357

- 1195 Idevall-Hagren O, Lü A, Xie B & De Camilli P (2015a) Triggered Ca<sup>2+</sup> influx is required for  
1196 extended synaptotagmin 1-induced ER-plasma membrane tethering. *EMBO J.* **34**: 1–15
- 1197 Idevall-Hagren O, Lü A, Xie B & De Camilli P (2015b) Triggered Ca<sup>2+</sup> influx is required for  
1198 extended synaptotagmin 1-induced ER-plasma membrane tethering. *EMBO* **34**: 2291–  
1199 2305
- 1200 Jones DT (1999) Protein secondary structure prediction based on position-specific scoring  
1201 matrices. *J. Mol. Biol.* **292**: 195–202
- 1202 Joshi A, Choudhary V, Levine T & Prinz W (2017) Lipid droplet and peroxisome biogenesis  
1203 occur at the same ER subdomains. *bioRxiv* [http://dx.:](http://dx.)
- 1204 Karimi M, Inzé D & Depicker A (2002) GATEWAYTM vectors for Agrobacterium-mediated  
1205 plant transformation. *Trends Plant Sci.* **7**: 193–195
- 1206 Kim YJ, Guzman-Hernandez ML, Wisniewski E & Balla T (2015) Phosphatidylinositol-  
1207 phosphatidic acid exchange by Nir2 at ER-PM contact sites maintains phosphoinositide  
1208 signaling competence. *Dev. Cell* **33**: 549–561
- 1209 Knox K, Wang P, Kriechbaumer V, Tilsner J, Frigerio L, Sparkes I, Hawes C & Oparka K  
1210 (2015) Putting the Squeeze on Plasmodesmata: A Role for Reticulons in Primary  
1211 Plasmodesmata Formation. *Plant Physiol.* **168**: 1563–72
- 1212 Kraner ME, Müller C & Sonnewald U (2017) Comparative proteomic profiling of the choline  
1213 transporter-like1 (CHER1) mutant provides insights into plasmodesmata composition of  
1214 fully developed Arabidopsis thaliana leaves. *Plant J.* **92**: 696–709
- 1215 Lee J-Y (2015) Plasmodesmata: a signaling hub at the cellular boundary. *Curr. Opin. Plant*  
1216 *Biol.* **27**: 133–140
- 1217 Levy A, Zheng JY & Lazarowitz SG (2015) Synaptotagmin SYTA forms ER-plasma  
1218 membrane junctions that are recruited to plasmodesmata for plant virus movement. *Curr.*  
1219 *Biol.* **25**: 1–8
- 1220 Lim GH, Shine MB, De Lorenzo L, Yu K, Cui W, Navarre D, Hunt AG, Lee JY, Kachroo A  
1221 & Kachroo P (2016) Plasmodesmata Localizing Proteins Regulate Transport and  
1222 Signaling during Systemic Acquired Immunity in Plants. *Cell Host Microbe* **19**: 541–549
- 1223 Littlejohn GR, Mansfield JC, Christmas JT, Witterick E, Fricker MD, Grant MR, Smirnov N,  
1224 Everson RM, Moger J & Love J (2014) An update: improvements in imaging  
1225 perfluorocarbon-mounted plant leaves with implications for studies of plant pathology,  
1226 physiology, development and cell biology. *Front. Plant Sci.* **5**: 1–8
- 1227 Liu L, Li C, Liang Z & Yu H (2017) Characterization of Multiple C2 Domain and  
1228 Transmembrane Region Proteins in Arabidopsis. *Plant Physiol.* **176**: pp.01144.2017



- 1229 Liu L, Li C, Song S, Wang Y, Jackson D, Yu H, Liu L, Li C, Song S, Wei Z, Teo N, Shen L,  
1230 Wang Y, Jackson D & Yu H (2018) FTIP-Dependent STM Trafficking Regulates Shoot  
1231 Meristem Development in Arabidopsis. *Cell Rep.* **23**: 1879–1890
- 1232 Liu L, Liu C, Hou X, Xi W, Shen L, Tao Z, Wang Y & Yu H (2012) FTIP1 is an essential  
1233 regulator required for florigen transport. *PLOS Biol.* **10**: e1001313
- 1234 Manford AG, Stefan CJ, Yuan HL, MacGurn JA & Emr SD (2012) ER-to-plasma membrane  
1235 tethering proteins regulate cell signaling and ER Morphology. *Dev. Cell* **23**: 1129–1140
- 1236 Marquès-Bueno MM, Morao AK, Cayrel A, Platre MP, Barberon M, Caillieux E, Colot V,  
1237 Jaillais Y, Roudier F & Vert G (2016) A versatile Multisite Gateway-compatible  
1238 promoter and transgenic line collection for cell type-specific functional genomics in  
1239 Arabidopsis. *Plant J.* **85**: 320–333
- 1240 Marty NJ, Holman CL, Abdullah N & Johnson CP (2014) The C2 domains of Otoferlin,  
1241 Dysferlin, and Myoferlin alter the packing of lipid bilayers. *Biochemistry* **52**:
- 1242 Metzger MB, Maurer MJ, Dancy BM & Michaelis S (2008) Degradation of a cytosolic  
1243 protein requires endoplasmic reticulum-associated degradation machinery. *J. Biol. Chem.*  
1244 **283**: 32302–32316
- 1245 Nakajima K, Sena G, Nawy T & Benfey PN (2001) Intercellular movement of the putative  
1246 transcription factor SHR in root patterning. *Nature* **413**: 307–311
- 1247 Nicolas W, Grison M, Trépout S, Gaston A, Fouché M, Cordelières F, Oparka K, Tilsner J,  
1248 Brocard L & Bayer E (2017a) Architecture and permeability of post-cytokinesis  
1249 plasmodesmata lacking cytoplasmic sleeve. *Nat. Plants* **3**: 17082
- 1250 Nicolas W, Grison MS & Bayer EMF (2017b) Shaping intercellular channels of  
1251 plasmodesmata: the structure-to-function missing link. *J. Exp. Bot.* **69**: 91–103
- 1252 Nikolovski N, Rubtsov D, Segura MP, Miles GP, Stevens TJ, Dunkley TPJ, Munro S, Lilley  
1253 KS & Dupree P (2012) Putative glycosyltransferases and other plant golgi apparatus  
1254 proteins are revealed. *Plant Physiol.* **160**: 1037–1051
- 1255 Omnus DJ, Manford AG, Bader JM, Emr SD & Stefan CJ (2016) Phosphoinositide kinase  
1256 signaling controls ER-PM cross-talk. *Mol. Biol. Cell* **27**: 1170–80
- 1257 Pérez-Lara Á, Thapa A, Nyenhuis SB, Nyenhuis DA, Halder P, Tietzel M, Tittmann K,  
1258 Cafiso DS & Jahn R (2016) PtdInsP<sub>2</sub> and PtdSer cooperate to trap synaptotagmin-1 to  
1259 the plasma membrane in the presence of calcium. *Elife* **5**: 1–22
- 1260 Pérez-sancho J, Schapire AL, Botella MA & Rosado A (2016) Analysis of protein-Lipid  
1261 interactions using purified C2 domains. *Methods Mol Biol* **1363**: 175–187
- 1262 Pérez-Sancho J, Vanneste S, Lee E, McFarlane H, Esteban del Valle A, Valpuesta V, Friml J,

- 1263 Botella MA & Rosado A (2015a) The Arabidopsis SYT1 is enriched in ER-PM contact  
1264 sites and confers cellular resistance to mechanical stresses. *Plant Physiol.* **168**: 132–143
- 1265 Pérez-Sancho J, Vanneste S, Lee E, McFarlane HE, Esteban Del Valle A, Valpuesta V, Friml  
1266 J, Botella MA & Rosado A (2015b) The Arabidopsis synaptotagmin1 is enriched in  
1267 endoplasmic reticulum-plasma membrane contact sites and confers cellular resistance to  
1268 mechanical stresses. *Plant Physiol.* **168**: 132–43
- 1269 Petkovic M, Jemaïel A, Daste F, Specht CG, Izeddin I, Vorkel D, Verbavatz J-M, Darzacq X,  
1270 Triller A, Pfenninger KH, Taresté D, Jackson CL & Galli T (2014) The SNARE Sec22b  
1271 has a non-fusogenic function in plasma membrane expansion. *Nat. Cell Biol.* **16**: 434–44
- 1272 Phillips MJ & Voeltz GK (2016) Structure and function of ER membrane contact sites with  
1273 other organelles. *Nat Rev Mol Cell Biol* **17**: 69–82
- 1274 Prinz WA (2014) Bridging the gap: Membrane contact sites in signaling, metabolism, and  
1275 organelle dynamics. *J. Cell Biol.* **205**: 759–769
- 1276 Reinisch KM & De Camilli P (2016) SMP-domain proteins at membrane contact sites:  
1277 Structure and function. *Biochim. Biophys. Acta - Mol. Cell Biol. Lipids* **1861**: 924–927
- 1278 Ross-elliott TJ, Jensen KH, Haaning KS, Wager BM, Knoblauch J, Howell AH, Mullendore  
1279 DL, Monteith AG, Paultre D, Yan D, Otero S, Bourdon M, Sager R, Lee J, Helariutta Y,  
1280 Knoblauch M & Oparka KJ (2017) Phloem unloading in Arabidopsis roots is convective  
1281 and regulated by the phloem- pole pericycle. *Elife* **6**: e24125
- 1282 Sager R & Lee J-Y (2014) Plasmodesmata in integrated cell signalling: insights from  
1283 development and environmental signals and stresses. *J. Exp. Bot.* **65**: 6337–6358
- 1284 Saheki Y, Bian X, Schauder CM, Sawaki Y, Surma MA, Klose C, Pincet F, Reinisch KM &  
1285 De Camilli P (2016) Control of plasma membrane lipid homeostasis by the extended  
1286 synaptotagmins. *Nat. Cell Biol.* **18**: 504–15
- 1287 Simon MLA, Platré MP, Marqués-bueno, Maria M, Armengot L, Stanislas T, Bayle V,  
1288 Caillaud M & Jaillais Y (2016) APTdIns(4)P-driven electrostatic field controls cell  
1289 membrane identity and signalling in plants. *Nat. Plants* **20;2**: 16089
- 1290 Simpson C, Thomas C, Findlay K, Bayer E & Maule AJ (2009) An Arabidopsis GPI-anchor  
1291 plasmodesmal neck protein with callose binding activity and potential to regulate cell-to-  
1292 cell trafficking. *Plant Cell* **21**: 581–594
- 1293 Söding J, Biegert A & Lupas AN (2005) The HHpred interactive server for protein homology  
1294 detection and structure prediction. *Nucleic Acids Res.* **33**: 244–248
- 1295 Stahl Y & Faulkner C (2016) Receptor complex mediated regulation of symplastic traffic.  
1296 *Trends Plant Sci.* **21**: 450–459

- 1297 Stahl Y, Grabowski S, Bleckmann A, Kühnemuth R, Weidtkamp-Peters S, Pinto KG,  
1298 Kirschner GK, Schmid JB, Wink RH, Hülsewede A, Felekyan S, Seidel CAM & Simon  
1299 R (2013) Moderation of arabidopsis root stemness by CLAVATA1 and ARABIDOPSIS  
1300 CRINKLY4 receptor kinase complexes. *Curr. Biol.* **23**: 362–371
- 1301 Steinegger M & Söding J (2017) MMseqs2 enables sensitive protein sequence searching for  
1302 the analysis of massive data sets. *Nat Biotechnol* **35**: 1026–1028
- 1303 Thomas CL, Bayer EM, Ritzenthaler C, Fernandez-Calvino L & Maule AJ (2008a) Specific  
1304 targeting of a plasmodesmal protein affecting cell-to-cell communication. *PLoS Biol.* **6**:  
1305 0180–0190
- 1306 Thomas CL, Bayer EM, Ritzenthaler C, Fernandez-Calvino L & Maule AJ (2008b) Specific  
1307 targeting of a plasmodesmal protein affecting cell-to-cell communication. *PLoS Biol.* **6**:  
1308
- 1309 Thompson JD, Gibson TJ, Plewniak F, Jeanmougin F & Higgins DG (1997) The CLUSTAL  
1310 \_ X windows interface: flexible strategies for multiple sequence alignment aided by  
1311 quality analysis tools. *Nucleic Acids Res.* **25**: 4876–4882
- 1312 Tilney LG, Cooke TJ, Connelly PS & Tilney MS (1991) The structure of plasmodesmata as  
1313 revealed by plasmolysis, detergent extraction, and protease digestion. *J. Cell Biol.* **112**:  
1314 739–747
- 1315 Tilsner J, Amari K & Torrance L (2011) Plasmodesmata viewed as specialised membrane  
1316 adhesion sites. *Protoplasma* **248**: 39–60
- 1317 Tilsner J, Nicolas W, Rosado A & Bayer EM (2016) Staying tight: plasmodesmata membrane  
1318 contact sites and the control of cell-to-cell connectivity. *Annu. Rev. Plant Biol.* **67**: 337–  
1319 64
- 1320 Trehin C, Schrempp S, Chauvet A, Berne-Dedieu A, Thierry A-M, Faure J-E, Negrutiu I &  
1321 Morel P (2013) QUIRKY interacts with STRUBBELIG and PAL OF QUIRKY to  
1322 regulate cell growth anisotropy during Arabidopsis gynoecium development.  
1323 *Development* **140**: 4807–4817
- 1324 Truernit E, Bauby H, Dubreucq B, Grandjean O, Runions J, Barthélémy J & Palauqui J-C  
1325 (2008) High-resolution whole-mount imaging of three-dimensional tissue organization  
1326 and gene expression enables the study of phloem development and structure in  
1327 Arabidopsis. *Plant Cell* **20**: 1494–1503
- 1328 Vaddepalli P, Herrmann a., Fulton L, Oelschner M, Hillmer S, Stratil TF, Fastner a.,  
1329 Hammes UZ, Ott T, Robinson DG & Schneitz K (2014) The C2-domain protein  
1330 QUIRKY and the receptor-like kinase STRUBBELIG localize to plasmodesmata and  
1331 mediate tissue morphogenesis in Arabidopsis thaliana. *Development* **141**: 4139–4148

- 1331 Vatén A, Dettmer J, Wu S, Stierhof YD, Miyashima S, Yadav SR, Roberts CJ, Campilho A,  
1332 Bulone V, Lichtenberger R, Lehesranta S, Mähönen AP, Kim JY, Jokitalo E, Sauer N,  
1333 Scheres B, Nakajima K, Carlsbecker A, Gallagher KL & Helariutta Y (2011) Callose  
1334 biosynthesis regulates symplastic trafficking during root development. *Dev. Cell* **21**:  
1335 1144–1155
- 1336 Wang P, Hawkins TJ, Richardson C, Cummins I, Deeks MJ, Sparkes I, Hawes C & Hussey  
1337 PJ (2014) The plant cytoskeleton, NET3C, and VAP27 mediate the link between the  
1338 plasma membrane and endoplasmic reticulum. *Curr. Biol.* **24**: 1397–1405
- 1339 Wang P, Richardson C, Hawkins TJ, Sparkes I, Hawes C & Hussey PJ (2016) Plant VAP27  
1340 proteins: domain characterization , intracellular localization and role in plant  
1341 development. *New Phytol.*: 1–17
- 1342 Wang X, Sager R, Cui W, Zhang C, Lu H & Lee J-Y (2013) Salicylic acid regulates  
1343 Plasmodesmata closure during innate immune responses in Arabidopsis. *Plant Cell* **25**:  
1344 2315–29
- 1345 Wong LH, Levine TP, Wirtz KW, Zilversmit DB, Pagano RE, Vance JE, Bernhard W,  
1346 Rouiller C, Prinz WA, Vihtelic TS, Goebel M, Milligan S, O'Tousa JE, Hyde DR, Levine  
1347 TP, Munro S, Loewen CJ, Roy A, Levine TP, Olkkonen VM, et al (2016) Lipid transfer  
1348 proteins do their thing anchored at membrane contact sites... but what is their thing?  
1349 *Biochem. Soc. Trans.* **44**: 517–27
- 1350 Wu S, O'Lexy R, Xu M, Sang Y, Chen X, Yu Q & Gallagher KL (2016) Symplastic signaling  
1351 instructs cell division, cell expansion, and cell polarity in the ground tissue of  
1352 Arabidopsis thaliana roots. *Proc. Natl. Acad. Sci.* **113**: 11621–11626
- 1353 Xu XM, Wang J, Xuan Z, Goldshmidt A, Borrill PGM, Hariharan N, Kim JY & Jackson D  
1354 (2011) Chaperonins facilitate KNOTTED1 cell-to-cell trafficking and stem cell function.  
1355 *Science* **333**: 1141–1144
- 1356 Zavaliev R, Dong X & Epel BL (2016) Glycosylphosphatidylinositol (GPI) modification  
1357 serves as a primary plasmodesmal sorting signal. *Plant Physiol.* **172**: 1061–1073
- 1358 Zavaliev R, Ueki S, Epel BL & Citovsky V (2011) Biology of callose ( $\beta$ -1,3-glucan) turnover  
1359 at plasmodesmata. *Protoplasma* **248**: 117–130
- 1360 Zhang SL, Yu Y, Roos J, Kozak JA, Deerinck TJ, Ellisman MH, Stauderman KA & Cahalan  
1361 MD (2005) STIM1 is a Ca<sup>2+</sup> sensor that activates CRAC channels and migrates from  
1362 the Ca<sup>2+</sup> store to the plasma membrane. *Nature* **437**: 902–5
- 1363 Zimmermann L, Stephens A, Nam S, Rau D, Kübler J, Lozajic M, Gabler F, Söding J, Lupas  
1364 AN & Alva V (2018) A Completely reimplemented MPI bioinformatics toolkit with a

1365 new HHpred server at its core. *J. Mol. Biol.* **430**: 2237–2243

1366

**a**

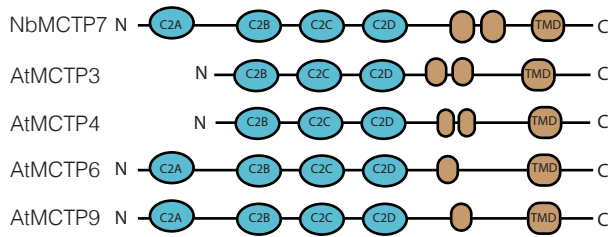

**b**

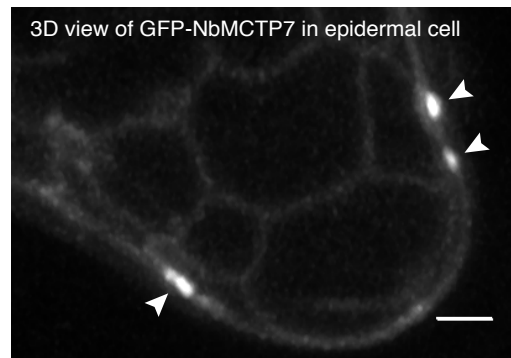

**c**

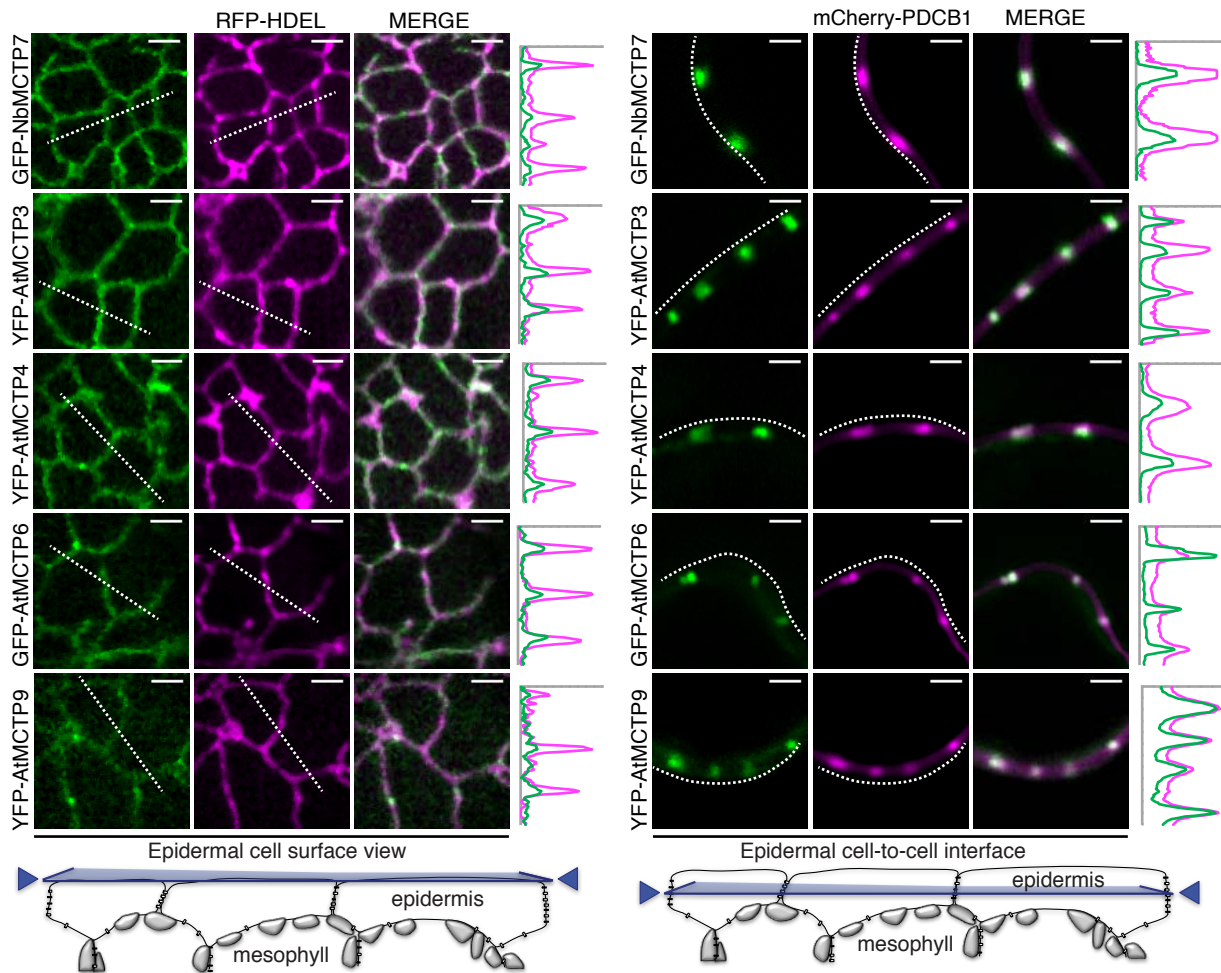

**d**

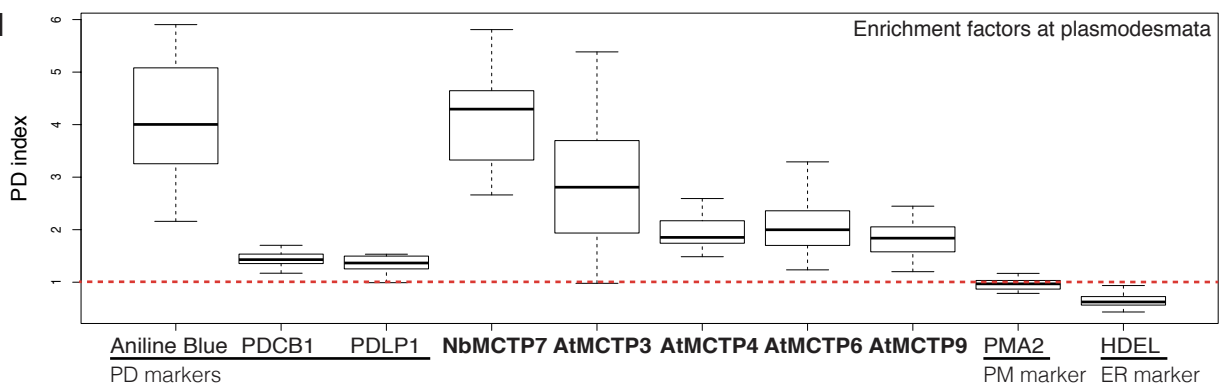

**e**

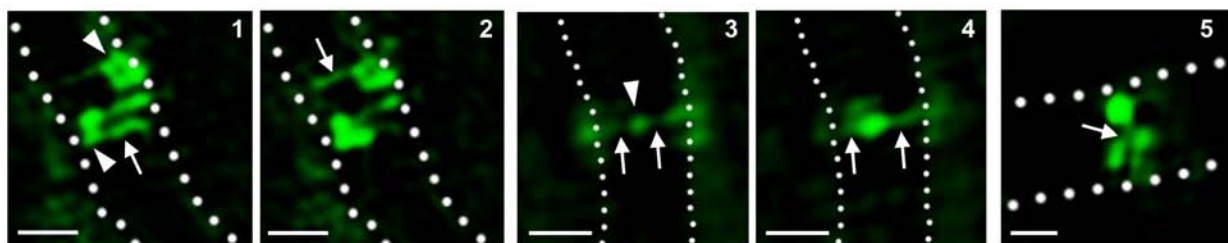

3D SIM of GFP-NbMCTP7

**a**

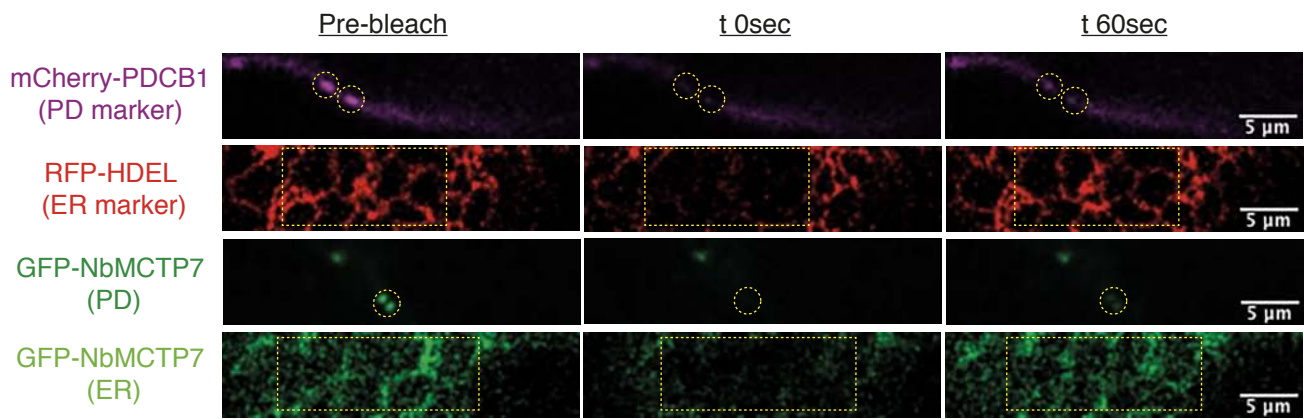

**b**

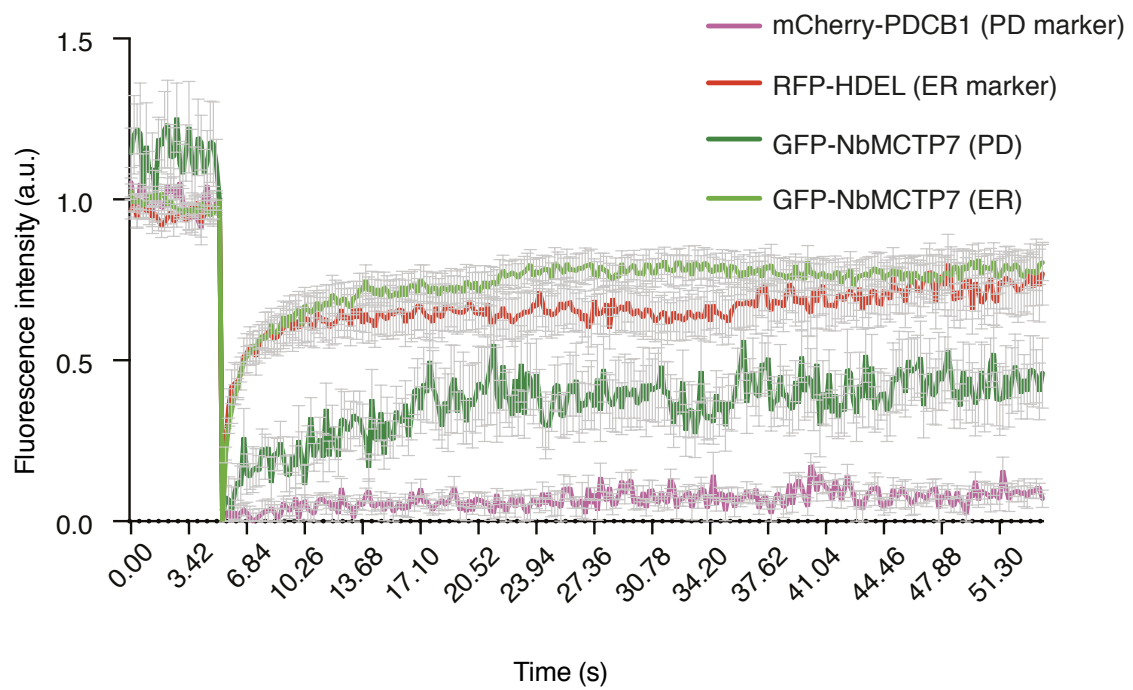

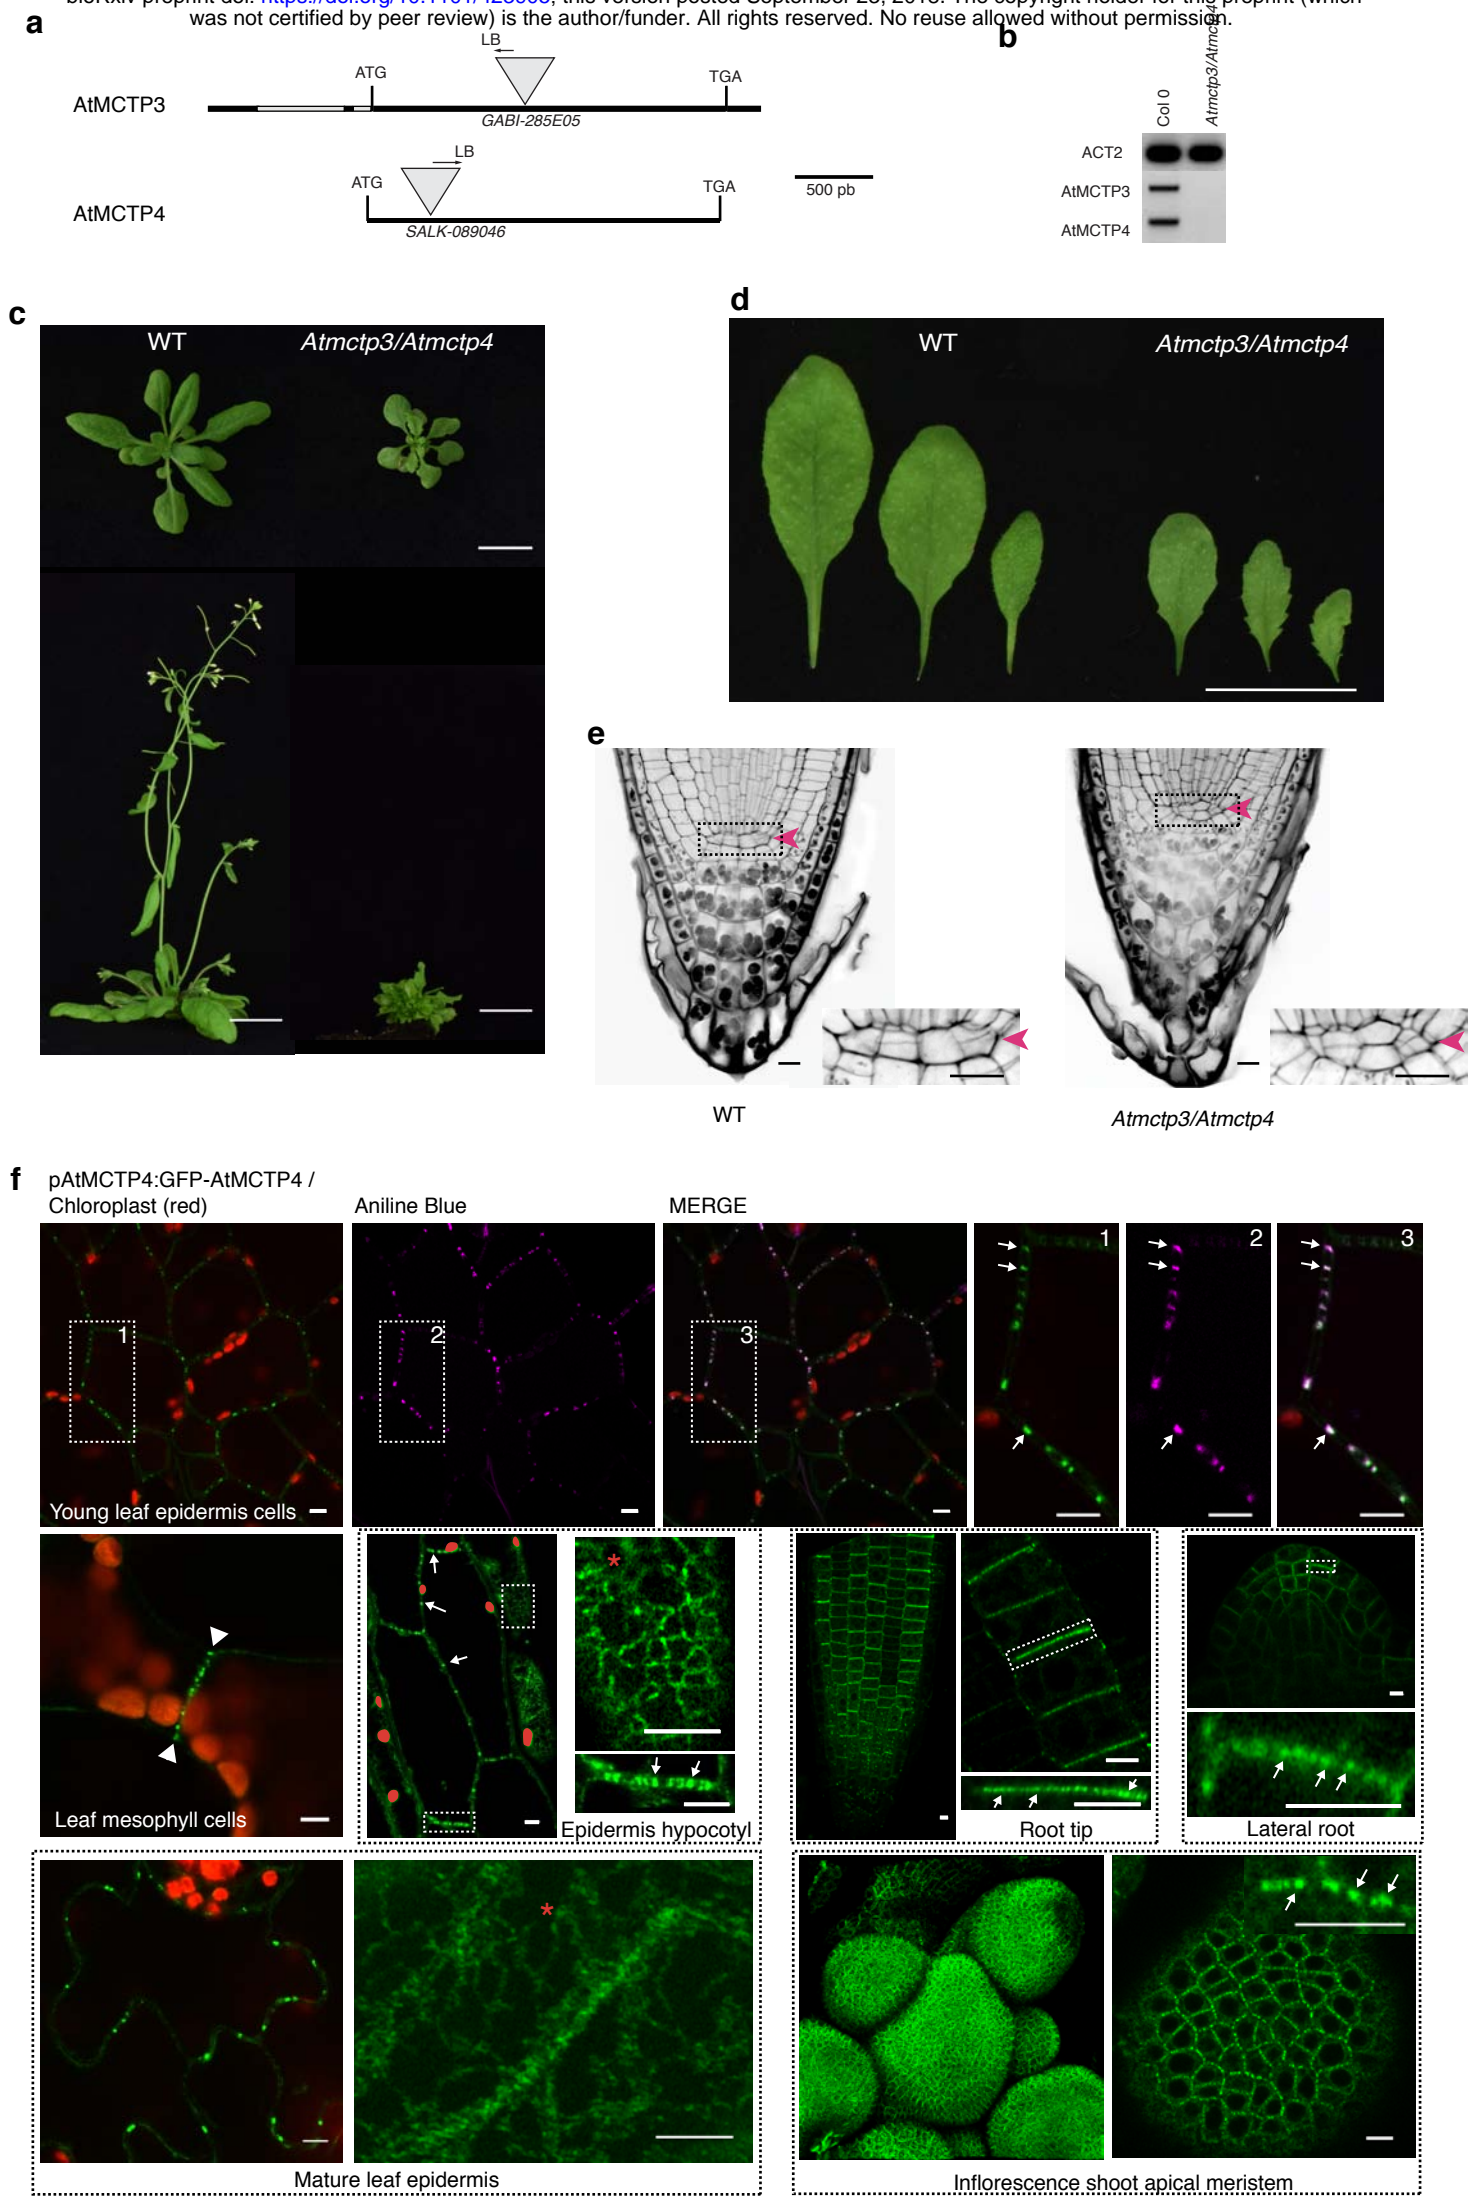



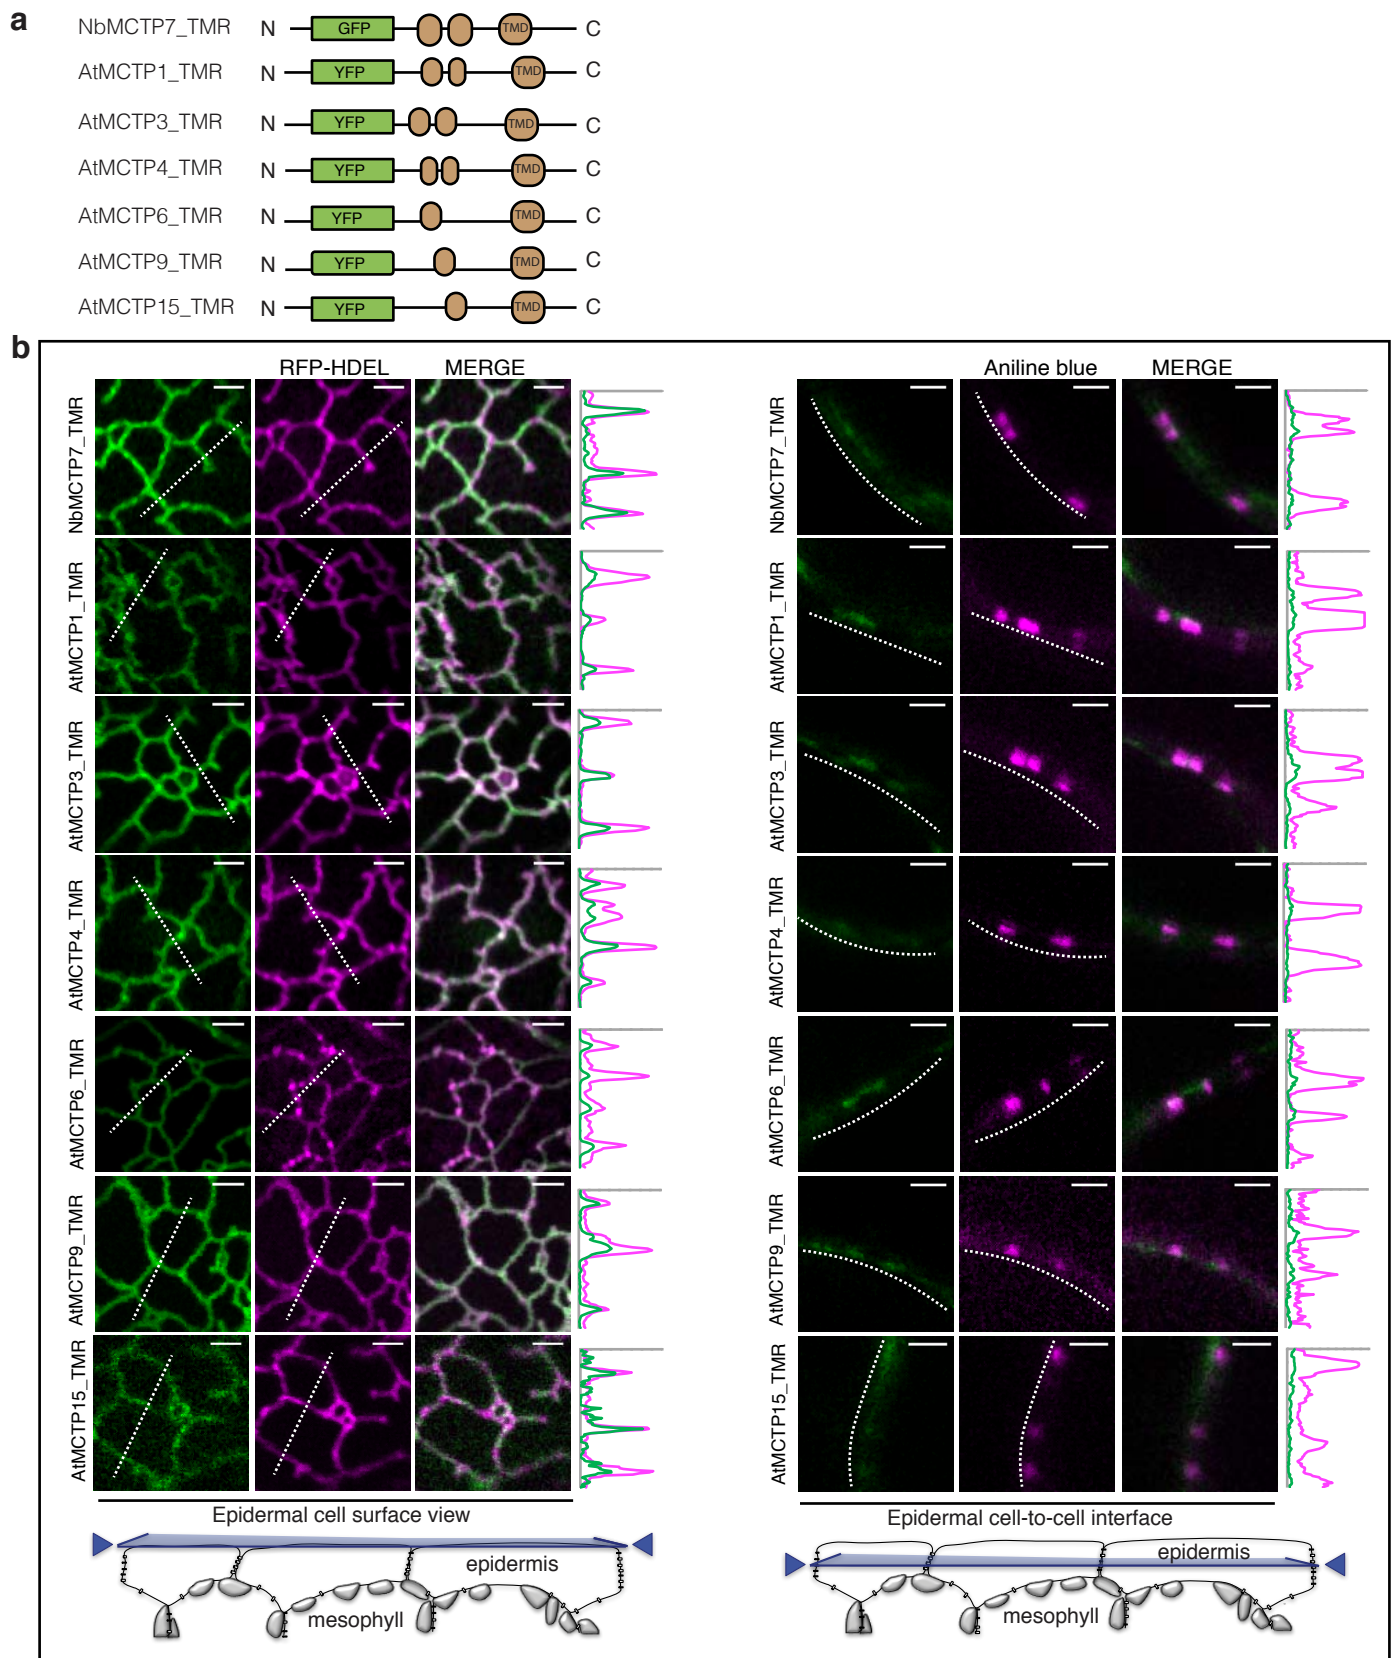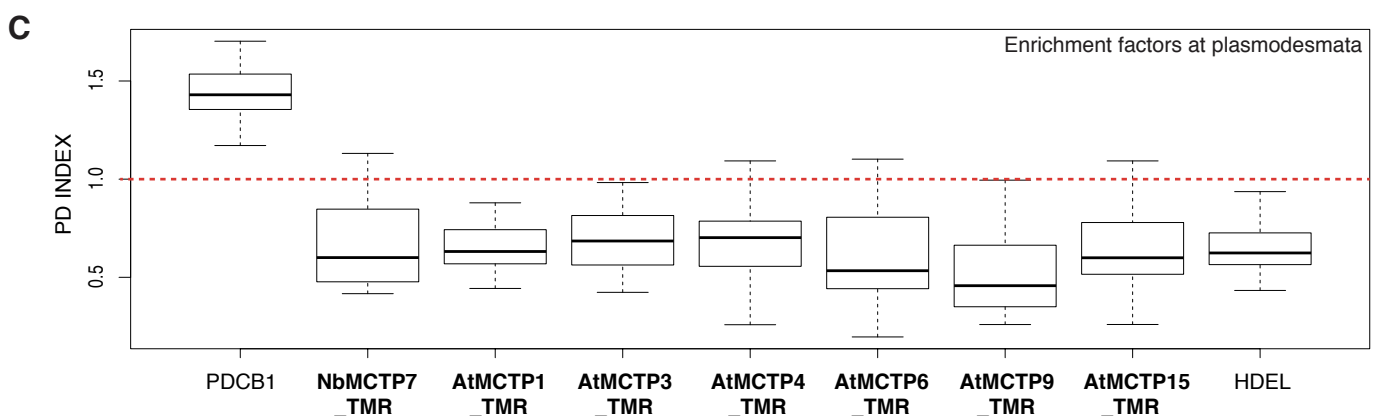

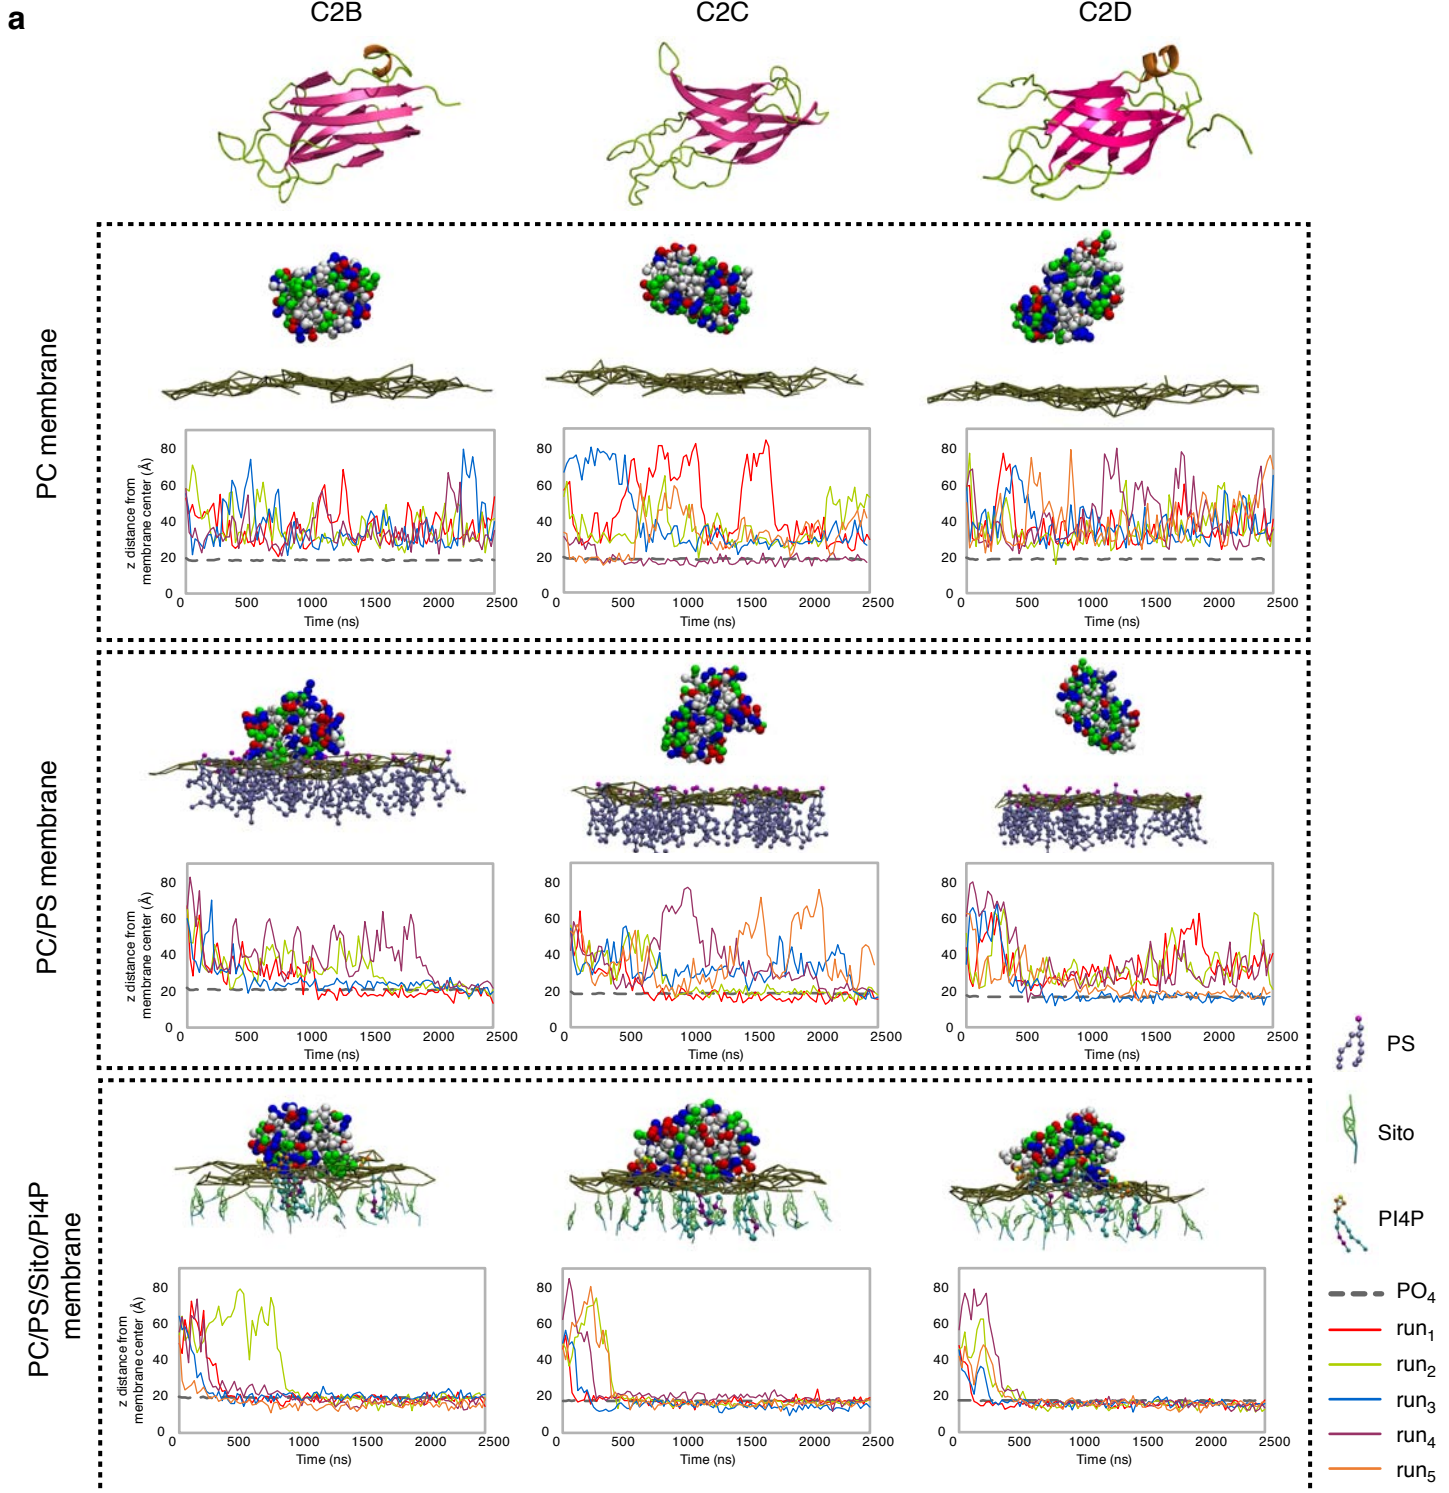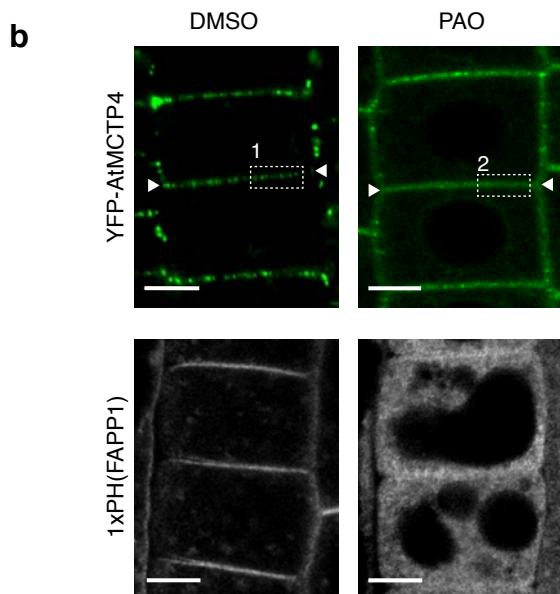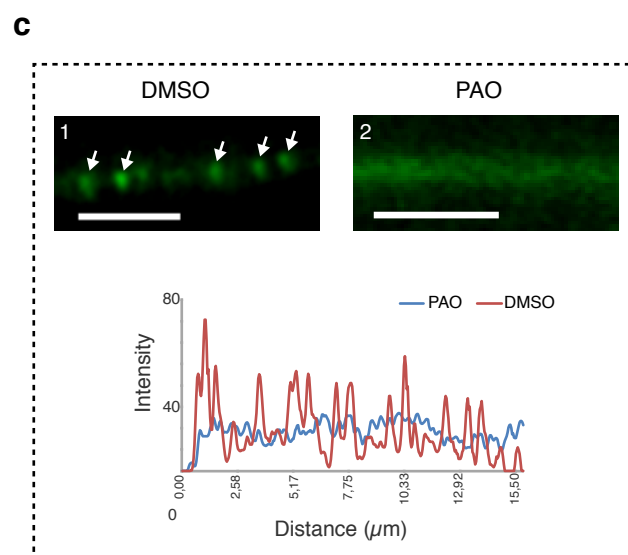

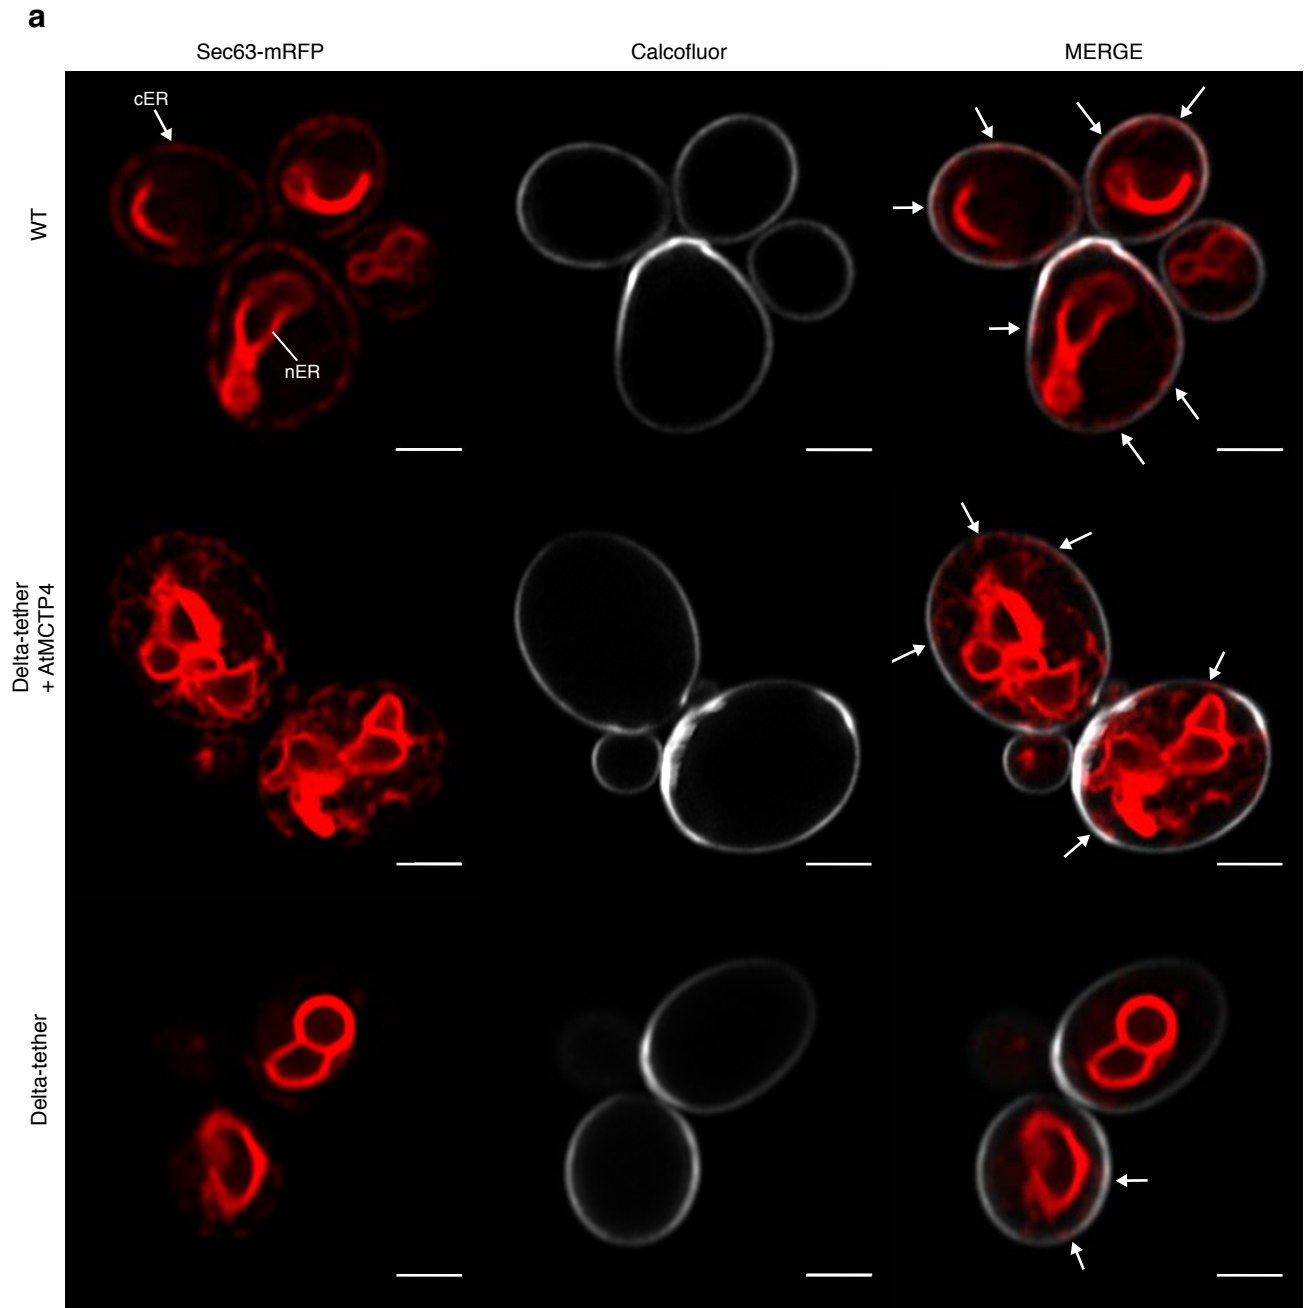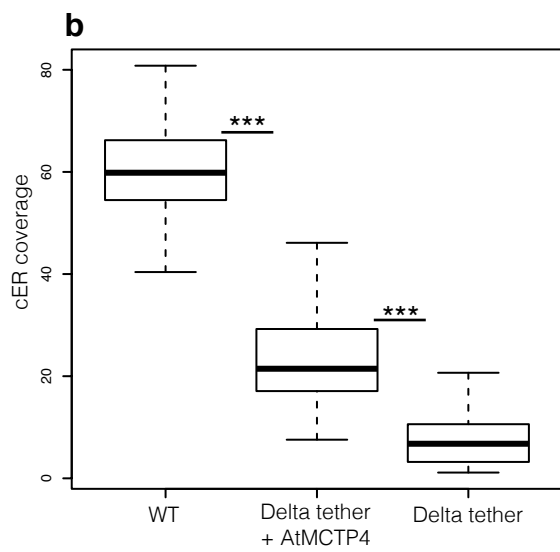

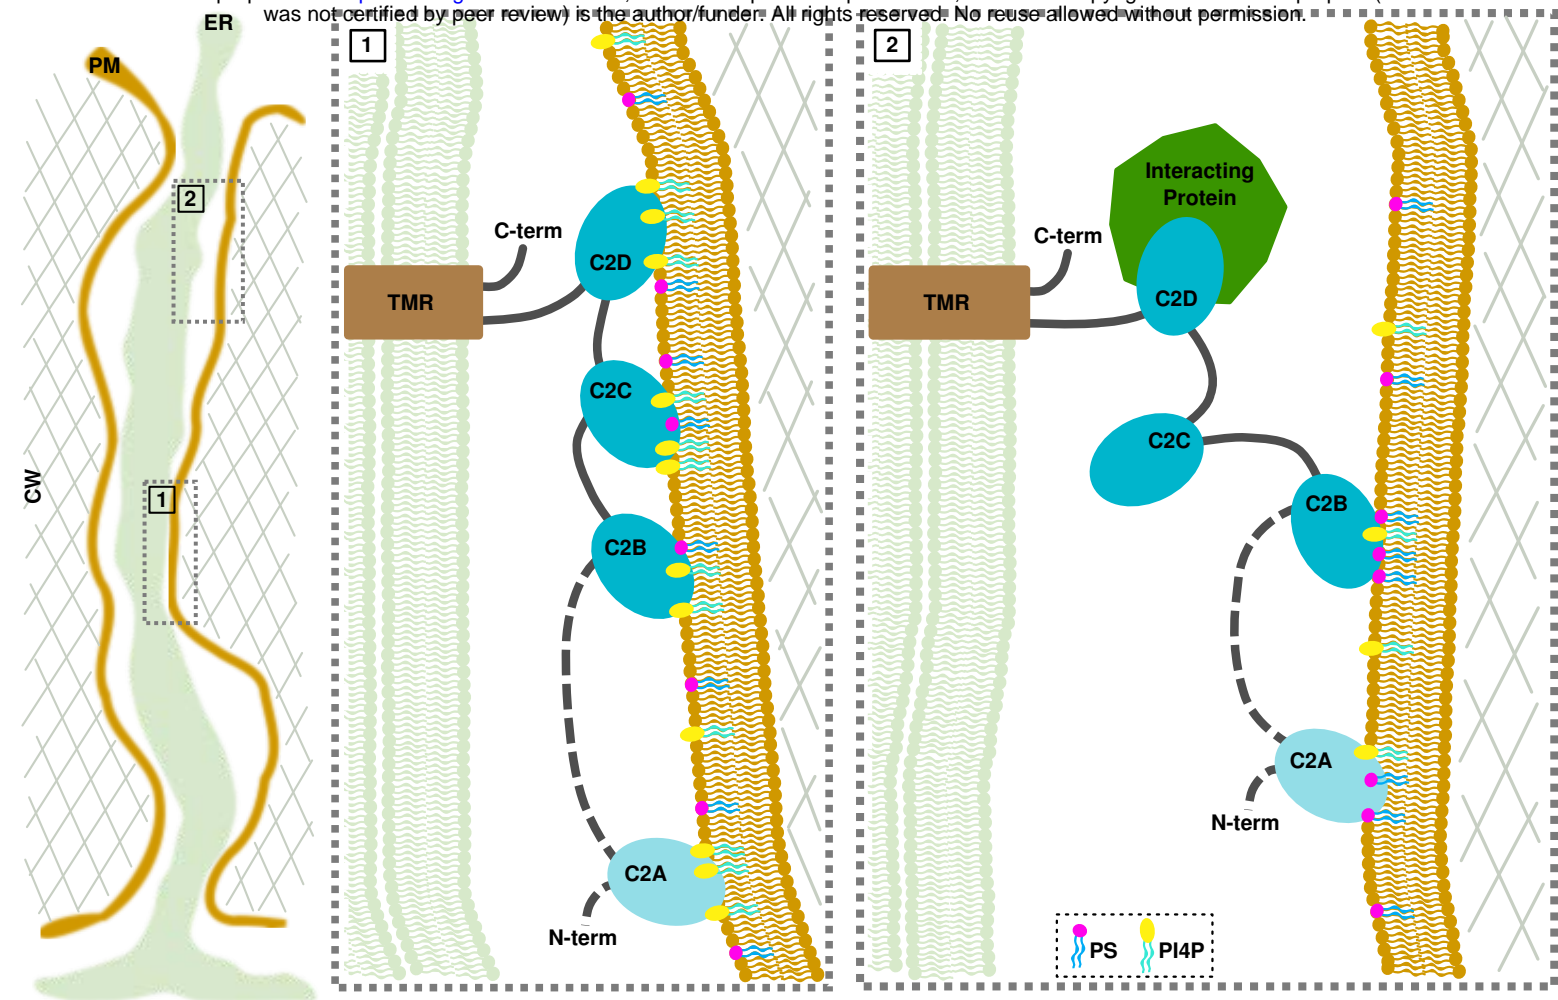

Source: http://biorxiv.org/content/10.1101/423905v1.full.pdf
